# Supplementary material for: Maternal demographic and antenatal factors, low birth weight and preterm birth: findings from the mother and child in the environment (MACE) birth cohort, Durban, South Africa
Source: Springer Nature journal article supplement (doi:10.1186/s12884-020-03328-6), 2020-10-16
Supplement: MOESM1 [file 18499832]

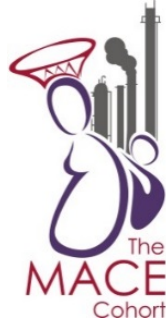

## Mother and Child in the Environment (MACE)

1. Date: \_\_\_/\_\_\_/\_\_\_  
Day Month Year

2. Mother Identification No.    -    -

Gestational Week \_\_\_\_\_

|                                   |                                                                                                                                                                                                                                                                                                                                                                 |
|-----------------------------------|-----------------------------------------------------------------------------------------------------------------------------------------------------------------------------------------------------------------------------------------------------------------------------------------------------------------------------------------------------------------|
| 1. Name of respondent:            | _____<br>First<br>_____<br>Middle<br>_____<br>Surname                                                                                                                                                                                                                                                                                                           |
| 2. Phone numbers:                 | home: _____<br>work: _____<br>cell: _____<br>other: _____                                                                                                                                                                                                                                                                                                       |
| 3. What is your physical address? | _____<br>House No.<br>_____<br>Road/Street<br>_____<br>City<br>_____<br>Postal Code                                                                                                                                                                                                                                                                             |
| 4. How old are you?               | _____ years                                                                                                                                                                                                                                                                                                                                                     |
| 5. What is your date of birth?    | ___/___/___<br>day month year<br><input type="checkbox"/> <sub>9</sub> Refused                                                                                                                                                                                                                                                                                  |
| 6. What is your marital status?   | <input type="checkbox"/> <sub>1</sub> Married<br><input type="checkbox"/> <sub>2</sub> Living together<br><input type="checkbox"/> <sub>3</sub> Single<br><input type="checkbox"/> <sub>4</sub> Divorced<br><input type="checkbox"/> <sub>5</sub> Separated<br><input type="checkbox"/> <sub>6</sub> Widow<br><input type="checkbox"/> <sub>7</sub> Other _____ |

|                                                                                                       |                                                                                                                                                                                                                                                                                                                                                                                                                                                                                                                                                                               |
|-------------------------------------------------------------------------------------------------------|-------------------------------------------------------------------------------------------------------------------------------------------------------------------------------------------------------------------------------------------------------------------------------------------------------------------------------------------------------------------------------------------------------------------------------------------------------------------------------------------------------------------------------------------------------------------------------|
| 7. What is the highest grade or year of school you completed? <b>[READ CHOICES – select only one]</b> | <input type="checkbox"/> <sub>1</sub> Never attended school or only pre-school<br><input type="checkbox"/> <sub>2</sub> Class 1 – Std 5 (Grades 1 through 7 )<br><input type="checkbox"/> <sub>3</sub> Std 6 – Std 9 (Grades 9 through 11- Some high school)<br><input type="checkbox"/> <sub>4</sub> Std 10 / Matric (Grade 12 - High school graduate)<br><input type="checkbox"/> <sub>5</sub> Non-degree training<br><input type="checkbox"/> <sub>6</sub> College / technikon / university (1 year to 3 years)<br><input type="checkbox"/> <sub>7</sub> Refused to answer |
| 8. What is the highest grade or year of school your baby's father completed? <b>[READ CHOICES]</b>    | <input type="checkbox"/> <sub>1</sub> Never attended school or only pre-school<br><input type="checkbox"/> <sub>2</sub> Class 1 – Std 5 (Grades 1 through 7 )<br><input type="checkbox"/> <sub>3</sub> Std 6 – Std 9 (Grades 9 through 11- Some high school)<br><input type="checkbox"/> <sub>4</sub> Std 10 / Matric (Grade 12 - High school graduate)<br><input type="checkbox"/> <sub>5</sub> Non-degree training<br><input type="checkbox"/> <sub>6</sub> College / technikon / university (1 year to 3 years)<br><input type="checkbox"/> <sub>7</sub> Refused to answer |

**[INTRODUCTION: INTERVIEWER READS TO RESPONDENT]**

The purpose of this questionnaire is to collect information about your pregnancy and reproductive health . If there is a question you do not want to answer, please let me know and we can skip it. All of your responses are confidential and will not shown to anyone outside the study team without your written consent. If you wish to stop the interview at anytime, please advise me. We can continue at a later time at your convenience

| <b>A. HOUSEHOLD CONDITIONS</b>                                   |                                                                                                                                                                                                                                                                                                                                                                           |
|------------------------------------------------------------------|---------------------------------------------------------------------------------------------------------------------------------------------------------------------------------------------------------------------------------------------------------------------------------------------------------------------------------------------------------------------------|
| 9. With whom do you live? <i>(Fill in one or several boxes.)</i> | <input type="checkbox"/> <sub>1</sub> Spouse<br><input type="checkbox"/> <sub>2</sub> Partner<br><input type="checkbox"/> <sub>3</sub> Parents<br><input type="checkbox"/> <sub>4</sub> Parents-in-law<br><input type="checkbox"/> <sub>5</sub> Children<br><input type="checkbox"/> <sub>6</sub> No one<br><input type="checkbox"/> <sub>88</sub> Others, describe _____ |
| 10. How many people including you live in your home?             | <input type="checkbox"/> <sub>1</sub> Number of people over 18 years<br><input type="checkbox"/> <sub>2</sub> Number of people between 12 and 18 years<br><input type="checkbox"/> <sub>3</sub> Number of people between 6 and 11 years<br><input type="checkbox"/> <sub>4</sub> Number of people under 6 years                                                           |
| 11. Usual language spoken at home:                               | <input type="checkbox"/> <sub>1</sub> English<br><input type="checkbox"/> <sub>2</sub> Zulu<br><input type="checkbox"/> <sub>3</sub> Xhosa<br><input type="checkbox"/> <sub>4</sub> Afrikaans<br><input type="checkbox"/> <sub>88</sub> Other<br>(Specify: _____ )                                                                                                        |
| 12. How many of your children are at nursery school?             | _____<br>no. of children                                                                                                                                                                                                                                                                                                                                                  |

|                                                                                                                                                                |                                                                                                                                                                                                                                                                                                                                                                                                           |
|----------------------------------------------------------------------------------------------------------------------------------------------------------------|-----------------------------------------------------------------------------------------------------------------------------------------------------------------------------------------------------------------------------------------------------------------------------------------------------------------------------------------------------------------------------------------------------------|
| 13. What is your yearly gross income? <i>(Include child support, unemployment benefits and other allowances.)</i>                                              | <input type="checkbox"/> <sub>0</sub> No income<br><input type="checkbox"/> <sub>1</sub> Less than R2 000<br><input type="checkbox"/> <sub>2</sub> R10 001–30 000<br><input type="checkbox"/> <sub>3</sub> R30 001–75 000<br><input type="checkbox"/> <sub>4</sub> R75 001–150 000<br><input type="checkbox"/> <sub>5</sub> R150 001 and above<br><input type="checkbox"/> <sub>6</sub> Refused to answer |
| 14. What is the baby's father's yearly gross income? <i>(Include child support, unemployment benefits and other allowances.)</i>                               | <input type="checkbox"/> <sub>0</sub> No income<br><input type="checkbox"/> <sub>1</sub> Less than R2 000<br><input type="checkbox"/> <sub>2</sub> R10 001–30 000<br><input type="checkbox"/> <sub>3</sub> R30 001–75 000<br><input type="checkbox"/> <sub>4</sub> R75 001–150 000<br><input type="checkbox"/> <sub>5</sub> R150 001 and above<br><input type="checkbox"/> <sub>6</sub> Refused to answer |
| 15. What type of housing do you live in?                                                                                                                       | <input type="checkbox"/> <sub>1</sub> Detached house, Semidetached<br><input type="checkbox"/> <sub>2</sub> Farm<br><input type="checkbox"/> <sub>3</sub> Flat, Terraced flat, Apartment building<br><input type="checkbox"/> <sub>4</sub> Refused to answer<br><input type="checkbox"/> <sub>88</sub> Other _____                                                                                        |
| 16. Has there been water damage, visible signs of fungus/mildew or a smell of mildew in your home in the past 3 months? <i>(Fill in one or several boxes.)</i> | <input type="checkbox"/> <sub>1</sub> No<br><input type="checkbox"/> <sub>2</sub> Yes, water damage<br><input type="checkbox"/> <sub>3</sub> Yes, signs of fungus and mould<br><input type="checkbox"/> <sub>4</sub> Yes, a smell of mildew                                                                                                                                                               |
| 17. What year was this house/structure originally built?                                                                                                       | _____ year<br><input type="checkbox"/> <sub>99</sub> don't know                                                                                                                                                                                                                                                                                                                                           |
| <b>IF RESPONDENT IS UNSURE ASK:</b><br>18. Would you say it was built:                                                                                         | <input type="checkbox"/> <sub>1</sub> before 1970<br><input type="checkbox"/> <sub>2</sub> between 1970 and 1985<br><input type="checkbox"/> <sub>3</sub> after 1985                                                                                                                                                                                                                                      |
| 19. How many rooms are there in your home? (counting the kitchen, but not the bathroom or toilet)                                                              | _____ rooms                                                                                                                                                                                                                                                                                                                                                                                               |
| 20 How long have you lived at this address?                                                                                                                    | _____ years<br><input type="checkbox"/> <sub>1</sub> less than 1 year                                                                                                                                                                                                                                                                                                                                     |
| 21. Is your home drinking water from the tap or from a river or dam?                                                                                           | <input type="checkbox"/> <sub>1</sub> tap<br><input type="checkbox"/> <sub>2</sub> river or dam<br><input type="checkbox"/> <sub>3</sub> well<br><input type="checkbox"/> <sub>88</sub> other, please specify: _____                                                                                                                                                                                      |
| 22. Do any pets live in this home?                                                                                                                             | <input type="checkbox"/> <sub>1</sub> Yes<br><input type="checkbox"/> <sub>2</sub> No <b>[If no, skip to Q24]</b>                                                                                                                                                                                                                                                                                         |

|                                                                                               |                                                                                                                                                                                                                                                                                                                                                                                                                                                                                               |
|-----------------------------------------------------------------------------------------------|-----------------------------------------------------------------------------------------------------------------------------------------------------------------------------------------------------------------------------------------------------------------------------------------------------------------------------------------------------------------------------------------------------------------------------------------------------------------------------------------------|
| 23. What kind of pets live here?                                                              |                                                                                                                                                                                                                                                                                                                                                                                                                                                                                               |
| (a). a dog?                                                                                   | <input type="checkbox"/> <sub>1</sub> Yes<br><input type="checkbox"/> <sub>2</sub> No                                                                                                                                                                                                                                                                                                                                                                                                         |
| (b). a cat?                                                                                   | <input type="checkbox"/> <sub>1</sub> Yes<br><input type="checkbox"/> <sub>2</sub> No                                                                                                                                                                                                                                                                                                                                                                                                         |
| (c). a bird?                                                                                  | <input type="checkbox"/> <sub>1</sub> Yes<br><input type="checkbox"/> <sub>2</sub> No                                                                                                                                                                                                                                                                                                                                                                                                         |
| (d). any other pet(s)                                                                         | <input type="checkbox"/> <sub>1</sub> Yes<br><input type="checkbox"/> <sub>2</sub> No<br><input type="checkbox"/> <sub>88</sub> please specify:<br>_____                                                                                                                                                                                                                                                                                                                                      |
| 24. During the past 12 months was a room heater used to heat one or more rooms in this house? |                                                                                                                                                                                                                                                                                                                                                                                                                                                                                               |
|                                                                                               | <input type="checkbox"/> <sub>1</sub> Yes<br><input type="checkbox"/> <sub>2</sub> No <b>[If no, skip to Q25]</b><br><input type="checkbox"/> <sub>99</sub> don't know <b>[If don't know, skip to Q25]</b>                                                                                                                                                                                                                                                                                    |
| (a). Was this heater fueled by                                                                | <input type="checkbox"/> <sub>0</sub> not applicable – no furnace<br><input type="checkbox"/> <sub>1</sub> paraffin<br><input type="checkbox"/> <sub>2</sub> gas<br><input type="checkbox"/> <sub>3</sub> electricity<br><input type="checkbox"/> <sub>4</sub> wood<br><input type="checkbox"/> <sub>5</sub> coal<br><input type="checkbox"/> <sub>6</sub> Gel<br><input type="checkbox"/> <sub>88</sub> other, please specify:<br>_____<br><input type="checkbox"/> <sub>88</sub> don't know |
| 25. During the past 12 months was one or more wood stoves used in this house?                 |                                                                                                                                                                                                                                                                                                                                                                                                                                                                                               |
|                                                                                               | <input type="checkbox"/> <sub>1</sub> Yes<br><input type="checkbox"/> <sub>2</sub> No<br><input type="checkbox"/> <sub>99</sub> Don't know                                                                                                                                                                                                                                                                                                                                                    |
| 26. During the past 12 months was a fireplace used to heat the rooms in this house?           |                                                                                                                                                                                                                                                                                                                                                                                                                                                                                               |
|                                                                                               | <input type="checkbox"/> <sub>1</sub> Yes<br><input type="checkbox"/> <sub>2</sub> No<br><input type="checkbox"/> <sub>99</sub> Don't know                                                                                                                                                                                                                                                                                                                                                    |
| 27. During the past 12 months was the stove or oven ever used to heat this house?             |                                                                                                                                                                                                                                                                                                                                                                                                                                                                                               |
|                                                                                               | <input type="checkbox"/> <sub>1</sub> Yes<br><input type="checkbox"/> <sub>2</sub> No<br><input type="checkbox"/> <sub>99</sub> Don't know                                                                                                                                                                                                                                                                                                                                                    |
| 28. Is a stove or oven used for cooking in this house?                                        |                                                                                                                                                                                                                                                                                                                                                                                                                                                                                               |
|                                                                                               | <input type="checkbox"/> <sub>1</sub> Yes<br><input type="checkbox"/> <sub>2</sub> No<br><input type="checkbox"/> <sub>99</sub> Don't know                                                                                                                                                                                                                                                                                                                                                    |
| (a). What is the primary source of heat for this stove or oven?                               | <input type="checkbox"/> <sub>1</sub> paraffin<br><input type="checkbox"/> <sub>2</sub> gas<br><input type="checkbox"/> <sub>3</sub> electricity<br><input type="checkbox"/> <sub>4</sub> wood<br><input type="checkbox"/> <sub>5</sub> coal<br><input type="checkbox"/> <sub>6</sub> Gel<br><input type="checkbox"/> <sub>88</sub> other, please specify:<br>_____<br><input type="checkbox"/> <sub>99</sub> don't know                                                                      |
| <b>B. FAMILY SMOKING CHARACTERISTICS</b>                                                      |                                                                                                                                                                                                                                                                                                                                                                                                                                                                                               |
| 29. Does anyone who lives here smoke cigarettes in the home?                                  |                                                                                                                                                                                                                                                                                                                                                                                                                                                                                               |
|                                                                                               | <input type="checkbox"/> <sub>1</sub> Yes<br><input type="checkbox"/> <sub>2</sub> No <b>[If no, skip to Q30]</b>                                                                                                                                                                                                                                                                                                                                                                             |
| If yes, for each member of the household who smokes, please indicate                          |                                                                                                                                                                                                                                                                                                                                                                                                                                                                                               |
| Cigarettes smoked per day in the home                                                         |                                                                                                                                                                                                                                                                                                                                                                                                                                                                                               |

### C. MENSTRUAL HISTORY

|                                                                                                                                                      |                                                                                                                                                                                                                                                                                                                                                                                            |
|------------------------------------------------------------------------------------------------------------------------------------------------------|--------------------------------------------------------------------------------------------------------------------------------------------------------------------------------------------------------------------------------------------------------------------------------------------------------------------------------------------------------------------------------------------|
| 30. How old were you when you had your first menstrual period?                                                                                       | _____ years<br>age                                                                                                                                                                                                                                                                                                                                                                         |
| 31. How many days between each menstrual cycle?                                                                                                      | <input type="checkbox"/> <sub>1</sub> 28 days<br><input type="checkbox"/> <sub>2</sub> 35 days<br><input type="checkbox"/> <sub>3</sub> > 40 days<br><input type="checkbox"/> <sub>99</sub> don't know                                                                                                                                                                                     |
| 32. Were your periods regular the year before you became pregnant?                                                                                   | <input type="checkbox"/> <sub>1</sub> Yes<br><input type="checkbox"/> <sub>2</sub> No                                                                                                                                                                                                                                                                                                      |
| 33. During the last year before you became pregnant, did you miss your period for more than three months without being pregnant?                     | <input type="checkbox"/> <sub>1</sub> Yes, due to another pregnancy<br><input type="checkbox"/> <sub>2</sub> Yes, due to other reasons<br><input type="checkbox"/> <sub>3</sub> No                                                                                                                                                                                                         |
| 34. Date of first day of last menstrual period                                                                                                       | ____/____/20____<br>Day/month/year                                                                                                                                                                                                                                                                                                                                                         |
| 35. Did your last menstrual period come at the expected time                                                                                         | <input type="checkbox"/> <sub>1</sub> Yes<br><input type="checkbox"/> <sub>2</sub> No                                                                                                                                                                                                                                                                                                      |
| 36. Are you certain about the date of first day of last menstrual period?                                                                            | <input type="checkbox"/> <sub>1</sub> Certain<br><input type="checkbox"/> <sub>2</sub> Uncertain                                                                                                                                                                                                                                                                                           |
| 37. Describe the duration, amount of bleeding and period pains of your last period                                                                   |                                                                                                                                                                                                                                                                                                                                                                                            |
| (a). Was the duration                                                                                                                                | <input type="checkbox"/> <sub>1</sub> Usual<br><input type="checkbox"/> <sub>2</sub> More than usual<br><input type="checkbox"/> <sub>3</sub> Less than usual                                                                                                                                                                                                                              |
| (b). Was the bleeding                                                                                                                                | <input type="checkbox"/> <sub>1</sub> Usual<br><input type="checkbox"/> <sub>2</sub> More than usual<br><input type="checkbox"/> <sub>3</sub> Less than usual                                                                                                                                                                                                                              |
| (c). Was the pain                                                                                                                                    | <input type="checkbox"/> <sub>1</sub> Usual<br><input type="checkbox"/> <sub>2</sub> More than usual<br><input type="checkbox"/> <sub>3</sub> Less than usual                                                                                                                                                                                                                              |
| <b>D. CONTRACEPTION AND REPRODUCTIVE HISTORY</b>                                                                                                     |                                                                                                                                                                                                                                                                                                                                                                                            |
| 38. Have you/your partner at any time during the last year used the following methods to avoid becoming pregnant? ( <i>Fill in all that apply.</i> ) | <input type="checkbox"/> <sub>1</sub> Condom<br><input type="checkbox"/> <sub>2</sub> Diaphragm<br><input type="checkbox"/> <sub>3</sub> IUD<br><input type="checkbox"/> <sub>5</sub> Hormone injection<br><input type="checkbox"/> <sub>7</sub> Pill<br><input type="checkbox"/> <sub>11</sub> No such methods<br><input type="checkbox"/> <sub>88</sub> Other                            |
| 39. If you have used the pill, how long have you used them?                                                                                          | <i>Pill</i><br><input type="checkbox"/> <sub>0</sub> never used<br><input type="checkbox"/> <sub>1</sub> Less than one year<br><input type="checkbox"/> <sub>2</sub> 1-3 years<br><input type="checkbox"/> <sub>3</sub> 4-6 years<br><input type="checkbox"/> <sub>4</sub> 7-9 years<br><input type="checkbox"/> <sub>5</sub> 10 years or more<br><b>[If Pill never used, skip to Q43]</b> |
| 40. If you have used the pill, how old were you when you first used it?                                                                              | _____ years old                                                                                                                                                                                                                                                                                                                                                                            |
| 41. Were you taking the pill during the last 4 months before this pregnancy?                                                                         | <input type="checkbox"/> <sub>1</sub> Yes<br><input type="checkbox"/> <sub>2</sub> No <b>[If no, skip to Q43]</b>                                                                                                                                                                                                                                                                          |
| 42. If yes, how long before your last menstrual period did you stop taking the pill                                                                  | _____ weeks                                                                                                                                                                                                                                                                                                                                                                                |
| 43. Was this pregnancy planned?                                                                                                                      | <input type="checkbox"/> <sub>1</sub> Yes<br><input type="checkbox"/> <sub>2</sub> No <b>[If no, skip to Q44]</b>                                                                                                                                                                                                                                                                          |

|                                                                                                                                                                     |                                                                                                                                                                                                                                                                                                                                                                                                                                           |
|---------------------------------------------------------------------------------------------------------------------------------------------------------------------|-------------------------------------------------------------------------------------------------------------------------------------------------------------------------------------------------------------------------------------------------------------------------------------------------------------------------------------------------------------------------------------------------------------------------------------------|
| (a). If yes, how many months did you have regular intercourse without contraception before you became pregnant?                                                     | <input type="checkbox"/> <sub>1</sub> Less than 1 month<br><input type="checkbox"/> <sub>2</sub> 1-2 months<br><input type="checkbox"/> <sub>3</sub> 3 months or more<br><input type="checkbox"/> <sub>4</sub> Number of months if more than 3                                                                                                                                                                                            |
| 44. Did you become pregnant even though you or your partner used contraceptives                                                                                     | <input type="checkbox"/> <sub>1</sub> Yes<br><input type="checkbox"/> <sub>2</sub> No <b>[If no, skip to Q46]</b>                                                                                                                                                                                                                                                                                                                         |
| 45. If yes, which type of contraceptives were used? (Fill in all that apply.)                                                                                       | <input type="checkbox"/> <sub>1</sub> Condom <b>[skip to Q47]</b><br><input type="checkbox"/> <sub>2</sub> Diaphragm <b>[skip to Q47]</b><br><input type="checkbox"/> <sub>3</sub> IUD<br><input type="checkbox"/> <sub>4</sub> Hormone injection <b>[skip to Q47]</b><br><input type="checkbox"/> <sub>5</sub> Pill <b>[skip to Q47]</b><br><input type="checkbox"/> <sub>88</sub> Other                                                 |
| 46. If you became pregnant while using an IUD, has it now been removed?                                                                                             | <input type="checkbox"/> <sub>1</sub> Yes<br><input type="checkbox"/> <sub>2</sub> No                                                                                                                                                                                                                                                                                                                                                     |
| 47. How long have you and the baby's father had a sexual relationship?                                                                                              | _____ months or _____ years                                                                                                                                                                                                                                                                                                                                                                                                               |
| 48. How often did you have sexual intercourse during the four weeks before you became pregnant ?                                                                    | <input type="checkbox"/> <sub>1</sub> Every day<br><input type="checkbox"/> <sub>2</sub> 5-6 times a week<br><input type="checkbox"/> <sub>3</sub> 3-4 times a week<br><input type="checkbox"/> <sub>4</sub> 1-2 times a week<br><input type="checkbox"/> <sub>5</sub> 1-2 times every two weeks<br><input type="checkbox"/> <sub>6</sub> Less than 1-2 times every 2 weeks<br><input type="checkbox"/> <sub>7</sub> Refused to answer    |
| 49. Have you ever been treated for infertility?                                                                                                                     | <input type="checkbox"/> <sub>1</sub> Yes<br><input type="checkbox"/> <sub>2</sub> No <b>[If no, skip to Q52]</b>                                                                                                                                                                                                                                                                                                                         |
| 50. If yes, was it in connection with this pregnancy or an earlier pregnancy?                                                                                       | <input type="checkbox"/> <sub>1</sub> This pregnancy<br><input type="checkbox"/> <sub>2</sub> Previous pregnancy                                                                                                                                                                                                                                                                                                                          |
| 51 (a) What type of treatment did you have?                                                                                                                         | <input type="checkbox"/> <sub>1</sub> Fallopian tube surgery<br><input type="checkbox"/> <sub>2</sub> Other surgery<br><input type="checkbox"/> <sub>3</sub> Medication for endometriosis<br><input type="checkbox"/> <sub>4</sub> Hormone treatment<br><input type="checkbox"/> <sub>5</sub> Insemination (injection of sperm)<br><input type="checkbox"/> <sub>6</sub> Test-tube method<br><input type="checkbox"/> <sub>88</sub> Other |
| 52. Have you been given information about amniocentesis?                                                                                                            | <input type="checkbox"/> <sub>1</sub> Yes<br><input type="checkbox"/> <sub>2</sub> No                                                                                                                                                                                                                                                                                                                                                     |
| <b>E. PREVIOUS PREGNANCIES</b>                                                                                                                                      |                                                                                                                                                                                                                                                                                                                                                                                                                                           |
| 53. Have you been pregnant before?<br>(Include all pregnancies that ended in abortion, miscarriage or stillbirth)                                                   | <input type="checkbox"/> <sub>1</sub> Yes<br><input type="checkbox"/> <sub>2</sub> No <b>[If no, skip to Q62]</b>                                                                                                                                                                                                                                                                                                                         |
| <b>If yes, fill in for all earlier pregnancies.<br/>[Include all pregnancies that ended in abortion, miscarriage or stillbirth as well as ectopic pregnancies].</b> |                                                                                                                                                                                                                                                                                                                                                                                                                                           |
| 54. Pregnancy No. 1                                                                                                                                                 |                                                                                                                                                                                                                                                                                                                                                                                                                                           |
| (a). Year of pregnancy _____                                                                                                                                        | _____ year                                                                                                                                                                                                                                                                                                                                                                                                                                |
| (b). Pregnancy outcome                                                                                                                                              | <input type="checkbox"/> <sub>1</sub> Live infant born<br><input type="checkbox"/> <sub>2</sub> Spontaneous abortion<br><input type="checkbox"/> <sub>3</sub> Termination of pregnancy<br><input type="checkbox"/> <sub>4</sub> Ectopic pregnancy                                                                                                                                                                                         |
| (c). Week of pregnancy for abortion/still birth                                                                                                                     | _____ weeks                                                                                                                                                                                                                                                                                                                                                                                                                               |
| (d) Did you breastfeed during this pregnancy?                                                                                                                       | <input type="checkbox"/> <sub>1</sub> Yes                                                                                                                                                                                                                                                                                                                                                                                                 |

|                                                 |                                                                                                                                                                                                                                                   |
|-------------------------------------------------|---------------------------------------------------------------------------------------------------------------------------------------------------------------------------------------------------------------------------------------------------|
|                                                 | <input type="checkbox"/> <sub>2</sub> No [If No, skip to Q f)                                                                                                                                                                                     |
| (e). No. of months breast feeding               | _____ months                                                                                                                                                                                                                                      |
| (f). Weight gain during pregnancy               | _____ kg                                                                                                                                                                                                                                          |
| (g). Smoked during pregnancy                    | <input type="checkbox"/> <sub>1</sub> Yes<br><input type="checkbox"/> <sub>2</sub> No                                                                                                                                                             |
| 55. Pregnancy No. 2                             |                                                                                                                                                                                                                                                   |
| (a). Year of pregnancy _____                    | _____ year                                                                                                                                                                                                                                        |
| (b). Pregnancy outcome                          | <input type="checkbox"/> <sub>1</sub> Live infant born<br><input type="checkbox"/> <sub>2</sub> Spontaneous abortion<br><input type="checkbox"/> <sub>3</sub> Termination of pregnancy<br><input type="checkbox"/> <sub>4</sub> Ectopic pregnancy |
| (c). Week of pregnancy for abortion/still birth | _____ weeks                                                                                                                                                                                                                                       |
| (d) Did you breastfeed during this pregnancy?   | <input type="checkbox"/> <sub>1</sub> Yes<br><input type="checkbox"/> <sub>2</sub> No [If No, skip to Q f)                                                                                                                                        |
| (e). No. of months breast feeding               | _____ months                                                                                                                                                                                                                                      |
| (f). Weight gain during pregnancy               | _____ kg                                                                                                                                                                                                                                          |
| (g). Smoked during pregnancy                    | <input type="checkbox"/> <sub>1</sub> Yes<br><input type="checkbox"/> <sub>2</sub> No                                                                                                                                                             |
| 56. Pregnancy No. 3                             |                                                                                                                                                                                                                                                   |
| (a). Year of pregnancy _____                    | _____ year                                                                                                                                                                                                                                        |
| (b). Pregnancy outcome                          | <input type="checkbox"/> <sub>1</sub> Live infant born<br><input type="checkbox"/> <sub>2</sub> Spontaneous abortion<br><input type="checkbox"/> <sub>3</sub> Termination of pregnancy<br><input type="checkbox"/> <sub>4</sub> Ectopic pregnancy |
| (c). Week of pregnancy for abortion/still birth | _____ weeks                                                                                                                                                                                                                                       |
| (d) Did you breastfeed during this pregnancy?   | <input type="checkbox"/> <sub>1</sub> Yes<br><input type="checkbox"/> <sub>2</sub> No [If No, skip to Q f)                                                                                                                                        |
| (e). No. of months breast feeding               | _____ months                                                                                                                                                                                                                                      |
| (f). Weight gain during pregnancy               | _____ kg                                                                                                                                                                                                                                          |
| (g). Smoked during pregnancy                    | <input type="checkbox"/> <sub>1</sub> Yes<br><input type="checkbox"/> <sub>2</sub> No                                                                                                                                                             |
| 57. Pregnancy No. 4                             |                                                                                                                                                                                                                                                   |
| (a). Year of pregnancy _____                    | _____ year                                                                                                                                                                                                                                        |
| (b). Pregnancy outcome                          | <input type="checkbox"/> <sub>1</sub> Live infant born<br><input type="checkbox"/> <sub>2</sub> Spontaneous abortion<br><input type="checkbox"/> <sub>3</sub> Termination of pregnancy<br><input type="checkbox"/> <sub>4</sub> Ectopic pregnancy |
| (c). Week of pregnancy for abortion/still birth | _____ weeks                                                                                                                                                                                                                                       |
| (d) Did you breastfeed during this pregnancy?   | <input type="checkbox"/> <sub>1</sub> Yes<br><input type="checkbox"/> <sub>2</sub> No [If No, skip to Q f)                                                                                                                                        |
| (e). No. of months breast feeding               | _____ months                                                                                                                                                                                                                                      |
| (f). Weight gain during pregnancy               | _____ kg                                                                                                                                                                                                                                          |

|                                                 |                                                                                                                                                                                                                                                   |
|-------------------------------------------------|---------------------------------------------------------------------------------------------------------------------------------------------------------------------------------------------------------------------------------------------------|
|                                                 | kg                                                                                                                                                                                                                                                |
| (g). Smoked during pregnancy                    | <input type="checkbox"/> <sub>1</sub> Yes<br><input type="checkbox"/> <sub>2</sub> No                                                                                                                                                             |
| 58. Pregnancy No. 5                             |                                                                                                                                                                                                                                                   |
| (a). Year of pregnancy _____                    | _____ year                                                                                                                                                                                                                                        |
| (b). Pregnancy outcome                          | <input type="checkbox"/> <sub>1</sub> Live infant born<br><input type="checkbox"/> <sub>2</sub> Spontaneous abortion<br><input type="checkbox"/> <sub>3</sub> Termination of pregnancy<br><input type="checkbox"/> <sub>4</sub> Ectopic pregnancy |
| (c). Week of pregnancy for abortion/still birth | _____ weeks                                                                                                                                                                                                                                       |
| (d) Did you breastfeed during this pregnancy?   | <input type="checkbox"/> <sub>1</sub> Yes<br><input type="checkbox"/> <sub>2</sub> No [If No, skip to Q f)                                                                                                                                        |
| (e). No. of months breast feeding               | _____ months                                                                                                                                                                                                                                      |
| (f). Weight gain during pregnancy               | _____ kg                                                                                                                                                                                                                                          |
| (g). Smoked during pregnancy                    | <input type="checkbox"/> <sub>1</sub> Yes<br><input type="checkbox"/> <sub>2</sub> No                                                                                                                                                             |
| 59. Pregnancy No. 6                             |                                                                                                                                                                                                                                                   |
| (a). Year of pregnancy _____                    | _____ year                                                                                                                                                                                                                                        |
| (b). Pregnancy outcome                          | <input type="checkbox"/> <sub>1</sub> Live infant born<br><input type="checkbox"/> <sub>2</sub> Spontaneous abortion<br><input type="checkbox"/> <sub>3</sub> Termination of pregnancy<br><input type="checkbox"/> <sub>4</sub> Ectopic pregnancy |
| (c). Week of pregnancy for abortion/still birth | _____ weeks                                                                                                                                                                                                                                       |
| (d) Did you breastfeed during this pregnancy?   | <input type="checkbox"/> <sub>1</sub> Yes<br><input type="checkbox"/> <sub>2</sub> No [If No, skip to Q f)                                                                                                                                        |
| (e). No. of months breast feeding               | _____ months                                                                                                                                                                                                                                      |
| (f). Weight gain during pregnancy               | _____ kg                                                                                                                                                                                                                                          |
| (g). Smoked during pregnancy                    | <input type="checkbox"/> <sub>1</sub> Yes<br><input type="checkbox"/> <sub>2</sub> No                                                                                                                                                             |
| 60. Pregnancy No. 7                             |                                                                                                                                                                                                                                                   |
| (a). Year of pregnancy _____                    | _____ year                                                                                                                                                                                                                                        |
| (b). Pregnancy outcome                          | <input type="checkbox"/> <sub>1</sub> Live infant born<br><input type="checkbox"/> <sub>2</sub> Spontaneous abortion<br><input type="checkbox"/> <sub>3</sub> Termination of pregnancy<br><input type="checkbox"/> <sub>4</sub> Ectopic pregnancy |
| (c). Week of pregnancy for abortion/still birth | _____ weeks                                                                                                                                                                                                                                       |
| (d) Did you breastfeed during this pregnancy?   | <input type="checkbox"/> <sub>1</sub> Yes<br><input type="checkbox"/> <sub>2</sub> No [If No, skip to Q f)                                                                                                                                        |
| (e). No. of months breast feeding               | _____ months                                                                                                                                                                                                                                      |
| (f). Weight gain during pregnancy               | _____ kg                                                                                                                                                                                                                                          |
| (g). Smoked during pregnancy                    | <input type="checkbox"/> <sub>1</sub> Yes<br><input type="checkbox"/> <sub>2</sub> No                                                                                                                                                             |
| 61. Pregnancy No. 8                             |                                                                                                                                                                                                                                                   |
| (a). Year of pregnancy _____                    | _____                                                                                                                                                                                                                                             |



|                                                                                                                                                                                    |                                                                                                                                                                                                                                                   |
|------------------------------------------------------------------------------------------------------------------------------------------------------------------------------------|---------------------------------------------------------------------------------------------------------------------------------------------------------------------------------------------------------------------------------------------------|
|                                                                                                                                                                                    | year                                                                                                                                                                                                                                              |
| (b). Pregnancy outcome                                                                                                                                                             | <input type="checkbox"/> <sub>1</sub> Live infant born<br><input type="checkbox"/> <sub>2</sub> Spontaneous abortion<br><input type="checkbox"/> <sub>3</sub> Termination of pregnancy<br><input type="checkbox"/> <sub>4</sub> Ectopic pregnancy |
| (c). Week of pregnancy for abortion/still birth                                                                                                                                    | _____ weeks                                                                                                                                                                                                                                       |
| (d) Did you breastfeed during this pregnancy?                                                                                                                                      | <input type="checkbox"/> <sub>1</sub> Yes<br><input type="checkbox"/> <sub>2</sub> No [If No, skip to Q f)                                                                                                                                        |
| (e). No. of months breast feeding                                                                                                                                                  | _____ months                                                                                                                                                                                                                                      |
| (f). Weight gain during pregnancy                                                                                                                                                  | _____ kg                                                                                                                                                                                                                                          |
| (g). Smoked during pregnancy                                                                                                                                                       | <input type="checkbox"/> <sub>1</sub> Yes<br><input type="checkbox"/> <sub>2</sub> No                                                                                                                                                             |
| 62. Have you had any of the following problems during previous pregnancies? (Fill in all that apply.)                                                                              |                                                                                                                                                                                                                                                   |
| (c). Severe nausea and vomiting                                                                                                                                                    | <input type="checkbox"/> <sub>1</sub> Yes<br><input type="checkbox"/> <sub>2</sub> No                                                                                                                                                             |
| (d). Eclampsia during pregnancy                                                                                                                                                    | <input type="checkbox"/> <sub>1</sub> Yes<br><input type="checkbox"/> <sub>2</sub> No                                                                                                                                                             |
| (e). Diabetes during pregnancy                                                                                                                                                     | <input type="checkbox"/> <sub>1</sub> Yes<br><input type="checkbox"/> <sub>2</sub> No                                                                                                                                                             |
| (f). Sugar in urine                                                                                                                                                                | <input type="checkbox"/> <sub>1</sub> Yes<br><input type="checkbox"/> <sub>2</sub> No                                                                                                                                                             |
| (g). Problems with incontinence                                                                                                                                                    | <input type="checkbox"/> <sub>1</sub> Yes<br><input type="checkbox"/> <sub>2</sub> No                                                                                                                                                             |
|                                                                                                                                                                                    | <b>NONE OF THE ABOVE</b>                                                                                                                                                                                                                          |
| <b>F. ILLNESSES AND HEALTH PROBLEMS DURING THIS PREGNANCY</b>                                                                                                                      |                                                                                                                                                                                                                                                   |
| 63. Have you had bleeding from the vagina once or more during this pregnancy?                                                                                                      | <input type="checkbox"/> <sub>1</sub> Yes<br><input type="checkbox"/> <sub>2</sub> No [If no, skip to Q69]                                                                                                                                        |
| 64. Number of episodes:                                                                                                                                                            | _____                                                                                                                                                                                                                                             |
| <b>If yes, describe from the first to the last bleeding episode. Give the date the bleeding started, how many days the bleeding lasted and how much you bled for each episode.</b> |                                                                                                                                                                                                                                                   |
| 65. First Bleeding Episode:                                                                                                                                                        |                                                                                                                                                                                                                                                   |
| (a). Date when bleeding started                                                                                                                                                    | _____                                                                                                                                                                                                                                             |
| (b). No. of days bleeding                                                                                                                                                          | _____                                                                                                                                                                                                                                             |
| (c). Amount                                                                                                                                                                        | <input type="checkbox"/> <sub>1</sub> Spotting<br><input type="checkbox"/> <sub>2</sub> Light bleeding<br><input type="checkbox"/> <sub>3</sub> Heavy bleeding                                                                                    |
| 66. Second Bleeding Episode:                                                                                                                                                       |                                                                                                                                                                                                                                                   |
| (a). Date when bleeding started                                                                                                                                                    | _____                                                                                                                                                                                                                                             |
| (b). No. of days bleeding                                                                                                                                                          | _____                                                                                                                                                                                                                                             |
| (c). Amount                                                                                                                                                                        | <input type="checkbox"/> <sub>1</sub> Spotting<br><input type="checkbox"/> <sub>2</sub> Light bleeding<br><input type="checkbox"/> <sub>3</sub> heavy bleeding                                                                                    |
| 67. Third Bleeding Episode:                                                                                                                                                        |                                                                                                                                                                                                                                                   |
| (a). Date when bleeding started                                                                                                                                                    | _____                                                                                                                                                                                                                                             |
| (b). No. of days bleeding                                                                                                                                                          | _____                                                                                                                                                                                                                                             |
| (c). Amount                                                                                                                                                                        | <input type="checkbox"/> <sub>1</sub> Spotting <input type="checkbox"/> <sub>2</sub> Light bleeding<br><input type="checkbox"/> <sub>3</sub> Heavy bleeding                                                                                       |
| 68. Fourth Bleeding Episode:                                                                                                                                                       |                                                                                                                                                                                                                                                   |
| (a). Date when bleeding started                                                                                                                                                    | _____                                                                                                                                                                                                                                             |
| (b). No. of days bleeding                                                                                                                                                          | _____                                                                                                                                                                                                                                             |

|                                                                                                                                                                                                                                                                                                                                                                                                                                                                                    |                                                                                                                                                                                                                   |
|------------------------------------------------------------------------------------------------------------------------------------------------------------------------------------------------------------------------------------------------------------------------------------------------------------------------------------------------------------------------------------------------------------------------------------------------------------------------------------|-------------------------------------------------------------------------------------------------------------------------------------------------------------------------------------------------------------------|
| (c). Amount                                                                                                                                                                                                                                                                                                                                                                                                                                                                        | <input type="checkbox"/> <sub>1</sub> Spotting <input type="checkbox"/> <sub>2</sub> Light bleeding<br><input type="checkbox"/> <sub>3</sub> Heavy bleeding                                                       |
| <b>Have you experienced any of the following illnesses or problems during this pregnancy? If you have used medication in connection with these problems give the name of the medicine, the weeks you took the medicines and how many days you took them. (Include all types of medication, both prescription and over the counter medicines in addition to alternative and herbal remedies. Do not include vitamins and dietary supplements as these are discussed elsewhere.)</b> |                                                                                                                                                                                                                   |
| 69. Abdominal Pain                                                                                                                                                                                                                                                                                                                                                                                                                                                                 | <input type="checkbox"/> <sub>1</sub> Yes<br><input type="checkbox"/> <sub>2</sub> No <b>[If no, skip to Q70]</b>                                                                                                 |
| (a). Week of pregnancy                                                                                                                                                                                                                                                                                                                                                                                                                                                             | _____ week of pregnancy                                                                                                                                                                                           |
| (b). Medication taken                                                                                                                                                                                                                                                                                                                                                                                                                                                              | <input type="checkbox"/> <sub>1</sub> Yes<br><input type="checkbox"/> <sub>2</sub> No <b>[If no, skip to Q70]</b>                                                                                                 |
| (i). Name of medication                                                                                                                                                                                                                                                                                                                                                                                                                                                            | _____                                                                                                                                                                                                             |
| (ii). Do you have the bottle or package that you could show?<br>[Interview to indicate whether bottle or package seen:<br>Seen: Yes _____/No _____]                                                                                                                                                                                                                                                                                                                                | <input type="checkbox"/> <sub>1</sub> Yes<br><input type="checkbox"/> <sub>2</sub> No                                                                                                                             |
| 70. Back Pain                                                                                                                                                                                                                                                                                                                                                                                                                                                                      | <input type="checkbox"/> <sub>1</sub> Yes<br><input type="checkbox"/> <sub>2</sub> No <b>[If no, skip to Q71]</b>                                                                                                 |
| (a). Week of pregnancy                                                                                                                                                                                                                                                                                                                                                                                                                                                             | _____ week of pregnancy                                                                                                                                                                                           |
| (b). Medication taken                                                                                                                                                                                                                                                                                                                                                                                                                                                              | <input type="checkbox"/> <sub>1</sub> Yes<br><input type="checkbox"/> <sub>2</sub> No <b>[If no, skip to Q71]</b>                                                                                                 |
| (i). Name of medication                                                                                                                                                                                                                                                                                                                                                                                                                                                            | _____                                                                                                                                                                                                             |
| (ii). Do you have the bottle or package that you could show?<br>[Interview to indicate whether bottle or package seen:<br>Seen: Yes _____/No _____]                                                                                                                                                                                                                                                                                                                                | <input type="checkbox"/> <sub>1</sub> Yes<br><input type="checkbox"/> <sub>2</sub> No                                                                                                                             |
| (iii). Was this prescribed by:                                                                                                                                                                                                                                                                                                                                                                                                                                                     | <input type="checkbox"/> <sub>1</sub> Doctor<br><input type="checkbox"/> <sub>2</sub> Clinic nurse<br><input type="checkbox"/> <sub>3</sub> None of the above<br><input type="checkbox"/> <sub>4</sub> Don't know |
| (iv). Was this over the counter medication                                                                                                                                                                                                                                                                                                                                                                                                                                         | <input type="checkbox"/> <sub>1</sub> Yes<br><input type="checkbox"/> <sub>2</sub> No                                                                                                                             |
| (v). No. of days taken                                                                                                                                                                                                                                                                                                                                                                                                                                                             | _____ days                                                                                                                                                                                                        |
| 71. Neck and Shoulder Pain                                                                                                                                                                                                                                                                                                                                                                                                                                                         | <input type="checkbox"/> <sub>1</sub> Yes<br><input type="checkbox"/> <sub>2</sub> No <b>[If no, skip to Q72]</b>                                                                                                 |
| (a). Week of pregnancy                                                                                                                                                                                                                                                                                                                                                                                                                                                             | _____ week of pregnancy                                                                                                                                                                                           |
| (b). Medication taken                                                                                                                                                                                                                                                                                                                                                                                                                                                              | <input type="checkbox"/> <sub>1</sub> Yes<br><input type="checkbox"/> <sub>2</sub> No <b>[If no, skip to Q72]</b>                                                                                                 |
| (i). Name of medication                                                                                                                                                                                                                                                                                                                                                                                                                                                            | _____                                                                                                                                                                                                             |
| (ii). Do you have the bottle or package that you could show?<br>[Interview to indicate whether bottle or package seen:<br>Seen: Yes _____/No _____]                                                                                                                                                                                                                                                                                                                                | <input type="checkbox"/> <sub>1</sub> Yes<br><input type="checkbox"/> <sub>2</sub> No                                                                                                                             |
| (iii). Was this prescribed by:                                                                                                                                                                                                                                                                                                                                                                                                                                                     | <input type="checkbox"/> <sub>1</sub> Doctor<br><input type="checkbox"/> <sub>2</sub> Clinic nurse<br><input type="checkbox"/> <sub>3</sub> None of the above<br><input type="checkbox"/> <sub>4</sub> Don't know |
| (iv). Was this over the counter medication                                                                                                                                                                                                                                                                                                                                                                                                                                         | <input type="checkbox"/> <sub>1</sub> Yes                                                                                                                                                                         |

|                                                                                                                                                     |                                                                                                                                                                                                                   |
|-----------------------------------------------------------------------------------------------------------------------------------------------------|-------------------------------------------------------------------------------------------------------------------------------------------------------------------------------------------------------------------|
|                                                                                                                                                     | <input type="checkbox"/> <sub>2</sub> No                                                                                                                                                                          |
| (v). No. of days taken                                                                                                                              | _____ days                                                                                                                                                                                                        |
| 72. Nausea                                                                                                                                          | <input type="checkbox"/> <sub>1</sub> Yes<br><input type="checkbox"/> <sub>2</sub> No <b>[If no, skip to Q73]</b>                                                                                                 |
| (a). Week of pregnancy                                                                                                                              | _____ week of pregnancy                                                                                                                                                                                           |
| (b). Medication taken                                                                                                                               | <input type="checkbox"/> <sub>1</sub> Yes<br><input type="checkbox"/> <sub>2</sub> No <b>[If no, skip to Q73]</b>                                                                                                 |
| (i). Name of medication                                                                                                                             | _____                                                                                                                                                                                                             |
| (ii). Do you have the bottle or package that you could show?<br>[Interview to indicate whether bottle or package seen:<br>Seen: Yes _____/No _____] | <input type="checkbox"/> <sub>1</sub> Yes<br><input type="checkbox"/> <sub>2</sub> No                                                                                                                             |
| (iii). Was this prescribed by:                                                                                                                      | <input type="checkbox"/> <sub>1</sub> Doctor<br><input type="checkbox"/> <sub>2</sub> Clinic nurse<br><input type="checkbox"/> <sub>3</sub> None of the above<br><input type="checkbox"/> <sub>4</sub> Don't know |
| (iv). Was this over the counter medication                                                                                                          | <input type="checkbox"/> <sub>1</sub> Yes<br><input type="checkbox"/> <sub>2</sub> No                                                                                                                             |
| (v). No. of days taken                                                                                                                              | _____ days                                                                                                                                                                                                        |
| 73. Nausea with Vomiting                                                                                                                            | <input type="checkbox"/> <sub>1</sub> Yes<br><input type="checkbox"/> <sub>2</sub> No <b>[If no, skip to Q74]</b>                                                                                                 |
| (a). Week of pregnancy                                                                                                                              | _____ week of pregnancy                                                                                                                                                                                           |
| (b). Medication taken                                                                                                                               | <input type="checkbox"/> <sub>1</sub> Yes<br><input type="checkbox"/> <sub>2</sub> No <b>[If no, skip to Q74]</b>                                                                                                 |
| (i). Name of medication                                                                                                                             | _____                                                                                                                                                                                                             |
| (ii). Do you have the bottle or package that you could show?<br>[Interview to indicate whether bottle or package seen:<br>Seen: Yes _____/No _____] | <input type="checkbox"/> <sub>1</sub> Yes<br><input type="checkbox"/> <sub>2</sub> No                                                                                                                             |
| (iii). Was this prescribed by:                                                                                                                      | <input type="checkbox"/> <sub>1</sub> Doctor<br><input type="checkbox"/> <sub>2</sub> Clinic nurse<br><input type="checkbox"/> <sub>3</sub> None of the above<br><input type="checkbox"/> <sub>4</sub> Don't know |
| (iv). Was this over the counter medication                                                                                                          | <input type="checkbox"/> <sub>1</sub> Yes<br><input type="checkbox"/> <sub>2</sub> No                                                                                                                             |
| (v). No. of days taken                                                                                                                              | _____ days                                                                                                                                                                                                        |
| 74. Vaginal Thrush                                                                                                                                  | <input type="checkbox"/> <sub>1</sub> Yes<br><input type="checkbox"/> <sub>2</sub> No <b>[If no, skip to Q75]</b>                                                                                                 |
| (a). Week of pregnancy                                                                                                                              | _____ week of pregnancy                                                                                                                                                                                           |
| (b). Medication taken                                                                                                                               | <input type="checkbox"/> <sub>1</sub> Yes<br><input type="checkbox"/> <sub>2</sub> No <b>[If no, skip to Q75]</b>                                                                                                 |
| (i). Name of medication                                                                                                                             | _____                                                                                                                                                                                                             |
| (ii). Do you have the bottle or package that you could show?<br>[Interview to indicate whether bottle or package seen:<br>Seen: Yes _____/No _____] | <input type="checkbox"/> <sub>1</sub> Yes<br><input type="checkbox"/> <sub>2</sub> No                                                                                                                             |
| (iii). Was this prescribed by:                                                                                                                      | <input type="checkbox"/> <sub>1</sub> Doctor<br><input type="checkbox"/> <sub>2</sub> Clinic nurse<br><input type="checkbox"/> <sub>3</sub> None of the above<br><input type="checkbox"/> <sub>4</sub> Don't know |
| (iv). Was this over the counter medication                                                                                                          | <input type="checkbox"/> <sub>1</sub> Yes<br><input type="checkbox"/> <sub>2</sub> No                                                                                                                             |
| (v). No. of days taken                                                                                                                              | _____ days                                                                                                                                                                                                        |

|                                                                                                                                                     |                                                                                                                                                                                                                   |
|-----------------------------------------------------------------------------------------------------------------------------------------------------|-------------------------------------------------------------------------------------------------------------------------------------------------------------------------------------------------------------------|
| 75. Vaginal Discharge                                                                                                                               | <input type="checkbox"/> <sub>1</sub> Yes<br><input type="checkbox"/> <sub>2</sub> No <b>[If no, skip to Q76]</b>                                                                                                 |
| (a). Week of pregnancy                                                                                                                              | _____ week of pregnancy                                                                                                                                                                                           |
| (b). Medication taken                                                                                                                               | <input type="checkbox"/> <sub>1</sub> Yes<br><input type="checkbox"/> <sub>2</sub> No <b>[If no, skip to Q76]</b>                                                                                                 |
| (i). Name of medication                                                                                                                             | _____                                                                                                                                                                                                             |
| (ii). Do you have the bottle or package that you could show?<br>[Interview to indicate whether bottle or package seen:<br>Seen: Yes _____/No _____] | <input type="checkbox"/> <sub>1</sub> Yes<br><input type="checkbox"/> <sub>2</sub> No                                                                                                                             |
| (iii). Was this prescribed by:                                                                                                                      | <input type="checkbox"/> <sub>1</sub> Doctor<br><input type="checkbox"/> <sub>2</sub> Clinic nurse<br><input type="checkbox"/> <sub>3</sub> None of the above<br><input type="checkbox"/> <sub>4</sub> Don't know |
| (iv). Was this over the counter medication                                                                                                          | <input type="checkbox"/> <sub>1</sub> Yes<br><input type="checkbox"/> <sub>2</sub> No                                                                                                                             |
| (v). No. of days taken                                                                                                                              | _____ days                                                                                                                                                                                                        |
| 76. Itchy rash                                                                                                                                      | <input type="checkbox"/> <sub>1</sub> Yes<br><input type="checkbox"/> <sub>2</sub> No <b>[If no, skip to Q77]</b>                                                                                                 |
| (a). Week of pregnancy                                                                                                                              | _____ week of pregnancy                                                                                                                                                                                           |
| (b). Medication taken                                                                                                                               | <input type="checkbox"/> <sub>1</sub> Yes<br><input type="checkbox"/> <sub>2</sub> No <b>[If no, skip to Q77]</b>                                                                                                 |
| (i). Name of medication                                                                                                                             | _____                                                                                                                                                                                                             |
| (ii). Do you have the bottle or package that you could show?<br>[Interview to indicate whether bottle or package seen:<br>Seen: Yes _____/No _____] | <input type="checkbox"/> <sub>1</sub> Yes<br><input type="checkbox"/> <sub>2</sub> No                                                                                                                             |
| (iii). Was this prescribed by:                                                                                                                      | <input type="checkbox"/> <sub>1</sub> Doctor<br><input type="checkbox"/> <sub>2</sub> Clinic nurse<br><input type="checkbox"/> <sub>3</sub> None of the above<br><input type="checkbox"/> <sub>4</sub> Don't know |
| (iv). Was this over the counter medication                                                                                                          | <input type="checkbox"/> <sub>1</sub> Yes<br><input type="checkbox"/> <sub>2</sub> No                                                                                                                             |
| (v). No. of days taken                                                                                                                              | _____ days                                                                                                                                                                                                        |
| 77. Constipation                                                                                                                                    | <input type="checkbox"/> <sub>1</sub> Yes<br><input type="checkbox"/> <sub>2</sub> No <b>[If no, skip to Q78]</b>                                                                                                 |
| (a). Week of pregnancy                                                                                                                              | _____ week of pregnancy                                                                                                                                                                                           |
| (b). Medication taken                                                                                                                               | <input type="checkbox"/> <sub>1</sub> Yes<br><input type="checkbox"/> <sub>2</sub> No <b>[If no, skip to Q78]</b>                                                                                                 |
| (i). Name of medication                                                                                                                             | _____                                                                                                                                                                                                             |
| (ii). Do you have the bottle or package that you could show?<br>[Interview to indicate whether bottle or package seen:<br>Seen: Yes _____/No _____] | <input type="checkbox"/> <sub>1</sub> Yes<br><input type="checkbox"/> <sub>2</sub> No                                                                                                                             |
| (iii). Was this prescribed by:                                                                                                                      | <input type="checkbox"/> <sub>1</sub> Doctor<br><input type="checkbox"/> <sub>2</sub> Clinic nurse<br><input type="checkbox"/> <sub>3</sub> None of the above<br><input type="checkbox"/> <sub>4</sub> Don't know |
| (iv). Was this over the counter medication                                                                                                          | <input type="checkbox"/> <sub>1</sub> Yes<br><input type="checkbox"/> <sub>2</sub> No                                                                                                                             |
| (v). No. of days taken                                                                                                                              | _____ days                                                                                                                                                                                                        |
| 78. Diarrhoea                                                                                                                                       | <input type="checkbox"/> <sub>1</sub> Yes                                                                                                                                                                         |

|                                                                                                                                                     |                                                                                                                                                                                                                   |
|-----------------------------------------------------------------------------------------------------------------------------------------------------|-------------------------------------------------------------------------------------------------------------------------------------------------------------------------------------------------------------------|
|                                                                                                                                                     | <input type="checkbox"/> <sub>2</sub> No <b>[If no, skip to Q79]</b>                                                                                                                                              |
| (a). Week of pregnancy                                                                                                                              | _____ week of pregnancy                                                                                                                                                                                           |
| (b). Medication taken                                                                                                                               | <input type="checkbox"/> <sub>1</sub> Yes<br><input type="checkbox"/> <sub>2</sub> No <b>[If no, skip to Q79]</b>                                                                                                 |
| (i). Name of medication                                                                                                                             | _____                                                                                                                                                                                                             |
| (ii). Do you have the bottle or package that you could show?<br>[Interview to indicate whether bottle or package seen:<br>Seen: Yes _____/No _____] | <input type="checkbox"/> <sub>1</sub> Yes<br><input type="checkbox"/> <sub>2</sub> No                                                                                                                             |
| (iii). Was this prescribed by:                                                                                                                      | <input type="checkbox"/> <sub>1</sub> Doctor<br><input type="checkbox"/> <sub>2</sub> Clinic nurse<br><input type="checkbox"/> <sub>3</sub> None of the above<br><input type="checkbox"/> <sub>4</sub> Don't know |
| (iv). Was this over the counter medication                                                                                                          | <input type="checkbox"/> <sub>1</sub> Yes<br><input type="checkbox"/> <sub>2</sub> No                                                                                                                             |
| (v). No. of days taken                                                                                                                              | _____ days                                                                                                                                                                                                        |
| <b>79. Unusual tiredness or sleepiness</b>                                                                                                          |                                                                                                                                                                                                                   |
|                                                                                                                                                     | <input type="checkbox"/> <sub>1</sub> Yes<br><input type="checkbox"/> <sub>2</sub> No <b>[If no, skip to Q80]</b>                                                                                                 |
| (a). Week of pregnancy                                                                                                                              | _____ week of pregnancy                                                                                                                                                                                           |
| (b). Medication taken                                                                                                                               | <input type="checkbox"/> <sub>1</sub> Yes<br><input type="checkbox"/> <sub>2</sub> No <b>[If no, skip to Q80]</b>                                                                                                 |
| (i). Name of medication                                                                                                                             | _____                                                                                                                                                                                                             |
| (ii). Do you have the bottle or package that you could show?<br>[Interview to indicate whether bottle or package seen:<br>Seen: Yes _____/No _____] | <input type="checkbox"/> <sub>1</sub> Yes<br><input type="checkbox"/> <sub>2</sub> No                                                                                                                             |
| (iii). Was this prescribed by:                                                                                                                      | <input type="checkbox"/> <sub>1</sub> Doctor<br><input type="checkbox"/> <sub>2</sub> Clinic nurse<br><input type="checkbox"/> <sub>3</sub> None of the above<br><input type="checkbox"/> <sub>4</sub> Don't know |
| (iv). Was this over the counter medication                                                                                                          | <input type="checkbox"/> <sub>1</sub> Yes<br><input type="checkbox"/> <sub>2</sub> No                                                                                                                             |
| (v). No. of days taken                                                                                                                              | _____ days                                                                                                                                                                                                        |
| <b>80. Sleeping Problems</b>                                                                                                                        |                                                                                                                                                                                                                   |
|                                                                                                                                                     | <input type="checkbox"/> <sub>1</sub> Yes<br><input type="checkbox"/> <sub>2</sub> No <b>[If no, skip to Q81]</b>                                                                                                 |
| (a). Week of pregnancy                                                                                                                              | _____ week of pregnancy                                                                                                                                                                                           |
| (b). Medication taken                                                                                                                               | <input type="checkbox"/> <sub>1</sub> Yes<br><input type="checkbox"/> <sub>2</sub> No <b>[If no, skip to Q81]</b>                                                                                                 |
| (i). Name of medication                                                                                                                             | _____                                                                                                                                                                                                             |
| (ii). Do you have the bottle or package that you could show?<br>[Interview to indicate whether bottle or package seen:<br>Seen: Yes _____/No _____] | <input type="checkbox"/> <sub>1</sub> Yes<br><input type="checkbox"/> <sub>2</sub> No                                                                                                                             |
| (iii). Was this prescribed by:                                                                                                                      | <input type="checkbox"/> <sub>1</sub> Doctor<br><input type="checkbox"/> <sub>2</sub> Clinic nurse<br><input type="checkbox"/> <sub>3</sub> None of the above<br><input type="checkbox"/> <sub>4</sub> Don't know |
| (iv). Was this over the counter medication                                                                                                          | <input type="checkbox"/> <sub>1</sub> Yes<br><input type="checkbox"/> <sub>2</sub> No                                                                                                                             |
| (v). No. of days taken                                                                                                                              | _____ days                                                                                                                                                                                                        |
| <b>81. Heartburn</b>                                                                                                                                |                                                                                                                                                                                                                   |
|                                                                                                                                                     | <input type="checkbox"/> <sub>1</sub> Yes<br><input type="checkbox"/> <sub>2</sub> No <b>[If no, skip to Q82]</b>                                                                                                 |
| (a). Week of pregnancy                                                                                                                              | _____ week of pregnancy                                                                                                                                                                                           |

|                                                                                                                                                     |                                                                                                                                                                                                                   |
|-----------------------------------------------------------------------------------------------------------------------------------------------------|-------------------------------------------------------------------------------------------------------------------------------------------------------------------------------------------------------------------|
| (b). Medication taken                                                                                                                               | <input type="checkbox"/> <sub>1</sub> Yes<br><input type="checkbox"/> <sub>2</sub> No <b>[If no, skip to Q82]</b>                                                                                                 |
| (i). Name of medication                                                                                                                             | _____                                                                                                                                                                                                             |
| (ii). Do you have the bottle or package that you could show?<br>[Interview to indicate whether bottle or package seen:<br>Seen: Yes _____/No _____] | <input type="checkbox"/> <sub>1</sub> Yes<br><input type="checkbox"/> <sub>2</sub> No                                                                                                                             |
| (iii). Was this prescribed by:                                                                                                                      | <input type="checkbox"/> <sub>1</sub> Doctor<br><input type="checkbox"/> <sub>2</sub> Clinic nurse<br><input type="checkbox"/> <sub>3</sub> None of the above<br><input type="checkbox"/> <sub>4</sub> Don't know |
| (iv). Was this over the counter medication                                                                                                          | <input type="checkbox"/> <sub>1</sub> Yes<br><input type="checkbox"/> <sub>2</sub> No                                                                                                                             |
| (v). No. of days taken                                                                                                                              | _____ days                                                                                                                                                                                                        |
| 82. Swelling of the legs and feet                                                                                                                   | <input type="checkbox"/> <sub>1</sub> Yes<br><input type="checkbox"/> <sub>2</sub> No <b>[If no, skip to Q83]</b>                                                                                                 |
| (a). Week of pregnancy                                                                                                                              | _____ week of pregnancy                                                                                                                                                                                           |
| (b). Medication taken                                                                                                                               | <input type="checkbox"/> <sub>1</sub> Yes<br><input type="checkbox"/> <sub>2</sub> No <b>[If no, skip to Q83]</b>                                                                                                 |
| (i). Name of medication                                                                                                                             | _____                                                                                                                                                                                                             |
| (ii). Do you have the bottle or package that you could show?<br>[Interview to indicate whether bottle or package seen:<br>Seen: Yes _____/No _____] | <input type="checkbox"/> <sub>1</sub> Yes<br><input type="checkbox"/> <sub>2</sub> No                                                                                                                             |
| (iii). Was this prescribed by:                                                                                                                      | <input type="checkbox"/> <sub>1</sub> Doctor<br><input type="checkbox"/> <sub>2</sub> Clinic nurse<br><input type="checkbox"/> <sub>3</sub> None of the above<br><input type="checkbox"/> <sub>4</sub> Don't know |
| (iv). Was this over the counter medication                                                                                                          | <input type="checkbox"/> <sub>1</sub> Yes<br><input type="checkbox"/> <sub>2</sub> No                                                                                                                             |
| (v). No. of days taken                                                                                                                              | _____ days                                                                                                                                                                                                        |
| 83. Fever with rash                                                                                                                                 | <input type="checkbox"/> <sub>1</sub> Yes<br><input type="checkbox"/> <sub>2</sub> No <b>[If no, skip to Q84]</b>                                                                                                 |
| (a). Week of pregnancy                                                                                                                              | _____ week of pregnancy                                                                                                                                                                                           |
| (b). Medication taken                                                                                                                               | <input type="checkbox"/> <sub>1</sub> Yes<br><input type="checkbox"/> <sub>2</sub> No <b>[If no, skip to Q84]</b>                                                                                                 |
| (i). Name of medication                                                                                                                             | _____                                                                                                                                                                                                             |
| (ii). Do you have the bottle or package that you could show?<br>[Interview to indicate whether bottle or package seen:<br>Seen: Yes _____/No _____] | <input type="checkbox"/> <sub>1</sub> Yes<br><input type="checkbox"/> <sub>2</sub> No                                                                                                                             |
| (iii). Was this prescribed by:                                                                                                                      | <input type="checkbox"/> <sub>1</sub> Doctor<br><input type="checkbox"/> <sub>2</sub> Clinic nurse<br><input type="checkbox"/> <sub>3</sub> None of the above<br><input type="checkbox"/> <sub>4</sub> Don't know |
| (iv). Was this over the counter medication                                                                                                          | <input type="checkbox"/> <sub>1</sub> Yes<br><input type="checkbox"/> <sub>2</sub> No                                                                                                                             |
| (v). No. of days taken                                                                                                                              | _____ days                                                                                                                                                                                                        |
| 84. High fever (over 38.5 degrees C)                                                                                                                | <input type="checkbox"/> <sub>1</sub> Yes<br><input type="checkbox"/> <sub>2</sub> No <b>[If no, skip to Q85]</b>                                                                                                 |
| (a). Week of pregnancy                                                                                                                              | _____ week of pregnancy                                                                                                                                                                                           |
| (b). Medication taken                                                                                                                               | <input type="checkbox"/> <sub>1</sub> Yes<br><input type="checkbox"/> <sub>2</sub> No <b>[If no, skip to Q85]</b>                                                                                                 |

|                                                                                                                                                     |                                                                                                                                                                                                                   |
|-----------------------------------------------------------------------------------------------------------------------------------------------------|-------------------------------------------------------------------------------------------------------------------------------------------------------------------------------------------------------------------|
| (i). Name of medication                                                                                                                             | _____                                                                                                                                                                                                             |
| (ii). Do you have the bottle or package that you could show?<br>[Interview to indicate whether bottle or package seen:<br>Seen: Yes _____/No _____] | <input type="checkbox"/> <sub>1</sub> Yes<br><input type="checkbox"/> <sub>2</sub> No                                                                                                                             |
| (iii). Was this prescribed by:                                                                                                                      | <input type="checkbox"/> <sub>1</sub> Doctor<br><input type="checkbox"/> <sub>2</sub> Clinic nurse<br><input type="checkbox"/> <sub>3</sub> None of the above<br><input type="checkbox"/> <sub>4</sub> Don't know |
| (iv). Was this over the counter medication                                                                                                          | <input type="checkbox"/> <sub>1</sub> Yes<br><input type="checkbox"/> <sub>2</sub> No                                                                                                                             |
| (v). No. of days taken                                                                                                                              | _____ days                                                                                                                                                                                                        |
| 85. Common cold                                                                                                                                     | <input type="checkbox"/> <sub>1</sub> Yes<br><input type="checkbox"/> <sub>2</sub> No <b>[If no, skip to Q 86]</b>                                                                                                |
| (a). Week of pregnancy                                                                                                                              | _____ week of pregnancy                                                                                                                                                                                           |
| (b). Medication taken                                                                                                                               | <input type="checkbox"/> <sub>1</sub> Yes<br><input type="checkbox"/> <sub>2</sub> No <b>[If no, skip to Q86]</b>                                                                                                 |
| (i). Name of medication                                                                                                                             | _____                                                                                                                                                                                                             |
| (ii). Do you have the bottle or package that you could show?<br>[Interview to indicate whether bottle or package seen:<br>Seen: Yes _____/No _____] | <input type="checkbox"/> <sub>1</sub> Yes<br><input type="checkbox"/> <sub>2</sub> No                                                                                                                             |
| (iii). Was this prescribed by:                                                                                                                      | <input type="checkbox"/> <sub>1</sub> Doctor<br><input type="checkbox"/> <sub>2</sub> Clinic nurse<br><input type="checkbox"/> <sub>3</sub> None of the above<br><input type="checkbox"/> <sub>4</sub> Don't know |
| (iv). Was this over the counter medication                                                                                                          | <input type="checkbox"/> <sub>1</sub> Yes<br><input type="checkbox"/> <sub>2</sub> No                                                                                                                             |
| (v). No. of days taken                                                                                                                              | _____ days                                                                                                                                                                                                        |
| 86. Throat infection                                                                                                                                | <input type="checkbox"/> <sub>1</sub> Yes<br><input type="checkbox"/> <sub>2</sub> No <b>[If no, skip to Q87]</b>                                                                                                 |
| (a). Week of pregnancy                                                                                                                              | _____ week of pregnancy                                                                                                                                                                                           |
| (b). Medication taken                                                                                                                               | <input type="checkbox"/> <sub>1</sub> Yes<br><input type="checkbox"/> <sub>2</sub> No <b>[If no, skip to Q87]</b>                                                                                                 |
| (i). Name of medication                                                                                                                             | _____                                                                                                                                                                                                             |
| (ii). Do you have the bottle or package that you could show?<br>[Interview to indicate whether bottle or package seen:<br>Seen: Yes _____/No _____] | <input type="checkbox"/> <sub>1</sub> Yes<br><input type="checkbox"/> <sub>2</sub> No                                                                                                                             |
| (iii). Was this prescribed by:                                                                                                                      | <input type="checkbox"/> <sub>1</sub> Doctor<br><input type="checkbox"/> <sub>2</sub> Clinic nurse<br><input type="checkbox"/> <sub>3</sub> None of the above<br><input type="checkbox"/> <sub>4</sub> Don't know |
| (iv). Was this over the counter medication                                                                                                          | <input type="checkbox"/> <sub>1</sub> Yes<br><input type="checkbox"/> <sub>2</sub> No                                                                                                                             |
| (v). No. of days taken                                                                                                                              | _____ days                                                                                                                                                                                                        |
| 87. Sinusitis with ear infection                                                                                                                    | <input type="checkbox"/> <sub>1</sub> Yes<br><input type="checkbox"/> <sub>2</sub> No <b>[If no, skip to Q88]</b>                                                                                                 |
| (a). Week of pregnancy                                                                                                                              | _____ week of pregnancy                                                                                                                                                                                           |
| (b). Medication taken                                                                                                                               | <input type="checkbox"/> <sub>1</sub> Yes<br><input type="checkbox"/> <sub>2</sub> No <b>[If no, skip to Q88]</b>                                                                                                 |
| (i). Name of medication                                                                                                                             | _____                                                                                                                                                                                                             |

|                                                                                                                                                     |                                                                                                                                                                                                                   |
|-----------------------------------------------------------------------------------------------------------------------------------------------------|-------------------------------------------------------------------------------------------------------------------------------------------------------------------------------------------------------------------|
| (ii). Do you have the bottle or package that you could show?<br>[Interview to indicate whether bottle or package seen:<br>Seen: Yes _____/No _____] | <input type="checkbox"/> <sub>1</sub> Yes<br><input type="checkbox"/> <sub>2</sub> No                                                                                                                             |
| (iii). Was this prescribed by:                                                                                                                      | <input type="checkbox"/> <sub>1</sub> Doctor<br><input type="checkbox"/> <sub>2</sub> Clinic nurse<br><input type="checkbox"/> <sub>3</sub> None of the above<br><input type="checkbox"/> <sub>4</sub> Don't know |
| (iv). Was this over the counter medication                                                                                                          | <input type="checkbox"/> <sub>1</sub> Yes<br><input type="checkbox"/> <sub>2</sub> No                                                                                                                             |
| (v). No. of days taken                                                                                                                              | _____ days                                                                                                                                                                                                        |
| 88. The 'Flu                                                                                                                                        | <input type="checkbox"/> <sub>1</sub> Yes<br><input type="checkbox"/> <sub>2</sub> No <b>[If no, skip to Q89]</b>                                                                                                 |
| (a). Week of pregnancy                                                                                                                              | _____ week of pregnancy                                                                                                                                                                                           |
| (b). Medication taken                                                                                                                               | <input type="checkbox"/> <sub>1</sub> Yes<br><input type="checkbox"/> <sub>2</sub> No <b>[If no, skip to Q89]</b>                                                                                                 |
| (i). Name of medication                                                                                                                             | _____                                                                                                                                                                                                             |
| (ii). Do you have the bottle or package that you could show?<br>[Interview to indicate whether bottle or package seen:<br>Seen: Yes _____/No _____] | <input type="checkbox"/> <sub>1</sub> Yes<br><input type="checkbox"/> <sub>2</sub> No                                                                                                                             |
| (iii). Was this prescribed by:                                                                                                                      | <input type="checkbox"/> <sub>1</sub> Doctor<br><input type="checkbox"/> <sub>2</sub> Clinic nurse<br><input type="checkbox"/> <sub>3</sub> None of the above<br><input type="checkbox"/> <sub>4</sub> Don't know |
| (iv). Was this over the counter medication                                                                                                          | <input type="checkbox"/> <sub>1</sub> Yes<br><input type="checkbox"/> <sub>2</sub> No                                                                                                                             |
| (v). No. of days taken                                                                                                                              | _____ days                                                                                                                                                                                                        |
| 89. Pneumonia or bronchitis                                                                                                                         | <input type="checkbox"/> <sub>1</sub> Yes<br><input type="checkbox"/> <sub>2</sub> No <b>[If no, skip to Q90]</b>                                                                                                 |
| (a). Week of pregnancy                                                                                                                              | _____ week of pregnancy                                                                                                                                                                                           |
| (b). Medication taken                                                                                                                               | <input type="checkbox"/> <sub>1</sub> Yes<br><input type="checkbox"/> <sub>2</sub> No <b>[If no, skip to Q90]</b>                                                                                                 |
| (i). Name of medication                                                                                                                             | _____                                                                                                                                                                                                             |
| (ii). Do you have the bottle or package that you could show?<br>[Interview to indicate whether bottle or package seen:<br>Seen: Yes _____/No _____] | <input type="checkbox"/> <sub>1</sub> Yes<br><input type="checkbox"/> <sub>2</sub> No                                                                                                                             |
| (iii). Was this prescribed by:                                                                                                                      | <input type="checkbox"/> <sub>1</sub> Doctor<br><input type="checkbox"/> <sub>2</sub> Clinic nurse<br><input type="checkbox"/> <sub>3</sub> None of the above<br><input type="checkbox"/> <sub>4</sub> Don't know |
| (iv). Was this over the counter medication                                                                                                          | <input type="checkbox"/> <sub>1</sub> Yes<br><input type="checkbox"/> <sub>2</sub> No                                                                                                                             |
| (v). No. of days taken                                                                                                                              | _____ days                                                                                                                                                                                                        |
| 90. Sugar in the urine                                                                                                                              | <input type="checkbox"/> <sub>1</sub> Yes<br><input type="checkbox"/> <sub>2</sub> No <b>[If no, skip to Q91]</b>                                                                                                 |
| (a). Week of pregnancy                                                                                                                              | _____ week of pregnancy                                                                                                                                                                                           |
| (b). Medication taken                                                                                                                               | <input type="checkbox"/> <sub>1</sub> Yes<br><input type="checkbox"/> <sub>2</sub> No <b>[If no, skip to Q91]</b>                                                                                                 |
| (i). Name of medication                                                                                                                             | _____                                                                                                                                                                                                             |
| (ii). Do you have the bottle or package that you could show?                                                                                        | <input type="checkbox"/> <sub>1</sub> Yes<br><input type="checkbox"/> <sub>2</sub> No                                                                                                                             |



|                                                                                                                                                     |                                                                                                                                                                                                                   |
|-----------------------------------------------------------------------------------------------------------------------------------------------------|-------------------------------------------------------------------------------------------------------------------------------------------------------------------------------------------------------------------|
| [Interview to indicate whether bottle or package seen:<br>Seen: Yes _____/No _____]                                                                 |                                                                                                                                                                                                                   |
| (iii). Was this prescribed by:                                                                                                                      | <input type="checkbox"/> <sub>1</sub> Doctor<br><input type="checkbox"/> <sub>2</sub> Clinic nurse<br><input type="checkbox"/> <sub>3</sub> None of the above<br><input type="checkbox"/> <sub>4</sub> Don't know |
| (iv). Was this over the counter medication                                                                                                          | <input type="checkbox"/> <sub>1</sub> Yes<br><input type="checkbox"/> <sub>2</sub> No                                                                                                                             |
| (v). No. of days taken                                                                                                                              | _____ days                                                                                                                                                                                                        |
| 91. Protein in the urine                                                                                                                            | <input type="checkbox"/> <sub>1</sub> Yes<br><input type="checkbox"/> <sub>2</sub> No <b>[If no, skip to Q92]</b>                                                                                                 |
| (a). Week of pregnancy                                                                                                                              | _____ week of pregnancy                                                                                                                                                                                           |
| (b). Medication taken                                                                                                                               | <input type="checkbox"/> <sub>1</sub> Yes<br><input type="checkbox"/> <sub>2</sub> No <b>[If no, skip to Q92]</b>                                                                                                 |
| (i). Name of medication                                                                                                                             | _____                                                                                                                                                                                                             |
| (ii). Do you have the bottle or package that you could show?<br>[Interview to indicate whether bottle or package seen:<br>Seen: Yes _____/No _____] | <input type="checkbox"/> <sub>1</sub> Yes<br><input type="checkbox"/> <sub>2</sub> No                                                                                                                             |
| (iii). Was this prescribed by:                                                                                                                      | <input type="checkbox"/> <sub>1</sub> Doctor<br><input type="checkbox"/> <sub>2</sub> Clinic nurse<br><input type="checkbox"/> <sub>3</sub> None of the above<br><input type="checkbox"/> <sub>4</sub> Don't know |
| (iv). Was this over the counter medication                                                                                                          | <input type="checkbox"/> <sub>1</sub> Yes<br><input type="checkbox"/> <sub>2</sub> No                                                                                                                             |
| (v). No. of days taken                                                                                                                              | _____ days                                                                                                                                                                                                        |
| 92. In the last three months, have you had diarrhea that lasted for more than three days?                                                           | <input type="checkbox"/> <sub>1</sub> Yes<br><input type="checkbox"/> <sub>2</sub> No                                                                                                                             |
| 93. In the last three months did you have fever for more than one month on end?                                                                     | <input type="checkbox"/> <sub>1</sub> Yes<br><input type="checkbox"/> <sub>2</sub> No                                                                                                                             |
| 94. Have you had white sores in your mouth over the last three months?                                                                              | <input type="checkbox"/> <sub>1</sub> Yes<br><input type="checkbox"/> <sub>2</sub> No                                                                                                                             |
| 95. Do you have swollen lymph nodes in your neck, under your arms or in your groin?                                                                 | <input type="checkbox"/> <sub>1</sub> Yes<br><input type="checkbox"/> <sub>2</sub> No                                                                                                                             |
| 96. Have you had shingles (painful blisters or sores usually in a narrow band on one side of the head or body) over the last 12 months?             | <input type="checkbox"/> <sub>1</sub> Yes<br><input type="checkbox"/> <sub>2</sub> No                                                                                                                             |

**G. PAST AND PRESENT ILLNESSES AND HEALTH PROBLEMS**

**Do you have or have you had any of the following illnesses or health problems? If you have taken medication (tablets, mixtures, suppositories, inhalers, creams, etc.) in conjunction with the illness or health problem give the name(s) of the medication(s) and when you took them.**

**Respiratory, Allergy and Skin Disorders**

|                                                                                                                                                     |                                                                                                                                                                                                                   |
|-----------------------------------------------------------------------------------------------------------------------------------------------------|-------------------------------------------------------------------------------------------------------------------------------------------------------------------------------------------------------------------|
| 97. Have you ever been told by a doctor that you have asthma                                                                                        | <input type="checkbox"/> <sub>1</sub> Yes<br><input type="checkbox"/> <sub>2</sub> No [If no, skip to Q98]                                                                                                        |
| (a). Were you told this more than six months before this pregnancy?                                                                                 | <input type="checkbox"/> <sub>1</sub> Yes [If yes, skip to d]<br><input type="checkbox"/> <sub>2</sub> No                                                                                                         |
| (b). Were you told this in the last six months before this pregnancy?                                                                               | <input type="checkbox"/> <sub>1</sub> Yes [If yes, skip to d]<br><input type="checkbox"/> <sub>2</sub> No                                                                                                         |
| (c). Were you told this during this pregnancy?                                                                                                      | <input type="checkbox"/> <sub>1</sub> Yes<br><input type="checkbox"/> <sub>2</sub> No                                                                                                                             |
| (i). If yes, in what week of the pregnancy?                                                                                                         | <input type="checkbox"/> <sub>1</sub> 0-4 weeks<br><input type="checkbox"/> <sub>2</sub> 5-8 weeks<br><input type="checkbox"/> <sub>3</sub> 9-12 weeks<br><input type="checkbox"/> <sub>4</sub> 13+ weeks         |
| (d). Have you taken any medication for this problem                                                                                                 | <input type="checkbox"/> <sub>1</sub> Yes<br><input type="checkbox"/> <sub>2</sub> No [If no, skip to Q98]                                                                                                        |
| (i). Name of medication                                                                                                                             | _____                                                                                                                                                                                                             |
| (ii). Do you have the bottle or package that you could show?<br>[Interview to indicate whether bottle or package seen:<br>Seen: Yes _____/No _____] | <input type="checkbox"/> <sub>1</sub> Yes<br><input type="checkbox"/> <sub>2</sub> No                                                                                                                             |
| (iii). Was this prescribed by:                                                                                                                      | <input type="checkbox"/> <sub>1</sub> Doctor<br><input type="checkbox"/> <sub>2</sub> Clinic nurse<br><input type="checkbox"/> <sub>3</sub> None of the above<br><input type="checkbox"/> <sub>4</sub> Don't know |
| (iv). Was this over the counter medication                                                                                                          | <input type="checkbox"/> <sub>1</sub> Yes<br><input type="checkbox"/> <sub>2</sub> No                                                                                                                             |
| (v). No. of days taken                                                                                                                              | _____ days                                                                                                                                                                                                        |
| 98. Have you ever been told by a doctor that you have chronic bronchitis                                                                            | <input type="checkbox"/> <sub>1</sub> Yes<br><input type="checkbox"/> <sub>2</sub> No [If no, skip to Q99]                                                                                                        |
| (a). Were you told this more than six months before this pregnancy?                                                                                 | <input type="checkbox"/> <sub>1</sub> Yes<br><input type="checkbox"/> <sub>2</sub> No                                                                                                                             |
| (b). Were you told this in the last six months before this pregnancy?                                                                               | <input type="checkbox"/> <sub>1</sub> Yes<br><input type="checkbox"/> <sub>2</sub> No                                                                                                                             |
| (c). Were you told this during this pregnancy?                                                                                                      | <input type="checkbox"/> <sub>1</sub> Yes<br><input type="checkbox"/> <sub>2</sub> No                                                                                                                             |
| (i). If yes, in what week of the pregnancy?                                                                                                         | <input type="checkbox"/> <sub>1</sub> 0-4 weeks<br><input type="checkbox"/> <sub>2</sub> 5-8 weeks<br><input type="checkbox"/> <sub>3</sub> 9-12 weeks<br><input type="checkbox"/> <sub>4</sub> 13+ weeks         |
| (d). Have you taken any medication for this problem                                                                                                 | <input type="checkbox"/> <sub>1</sub> Yes<br><input type="checkbox"/> <sub>2</sub> No [If no, skip to Q99]                                                                                                        |
| (i). Name of medication                                                                                                                             | _____                                                                                                                                                                                                             |
| (ii). Do you have the bottle or package that you could show?<br>[Interview to indicate whether bottle or package seen:<br>Seen: Yes _____/No _____] | <input type="checkbox"/> <sub>1</sub> Yes<br><input type="checkbox"/> <sub>2</sub> No                                                                                                                             |
| (iii). Was this prescribed by:                                                                                                                      | <input type="checkbox"/> <sub>1</sub> Doctor<br><input type="checkbox"/> <sub>2</sub> Clinic nurse<br><input type="checkbox"/> <sub>3</sub> None of the above                                                     |

|                                                                                                                                                     |                                                                                                                                                                                                                   |
|-----------------------------------------------------------------------------------------------------------------------------------------------------|-------------------------------------------------------------------------------------------------------------------------------------------------------------------------------------------------------------------|
|                                                                                                                                                     | <input type="checkbox"/> <sub>4</sub> Don't know                                                                                                                                                                  |
| (iv). Was this over the counter medication                                                                                                          | <input type="checkbox"/> <sub>1</sub> Yes<br><input type="checkbox"/> <sub>2</sub> No                                                                                                                             |
| (v). No. of days taken                                                                                                                              | _____ days                                                                                                                                                                                                        |
|                                                                                                                                                     |                                                                                                                                                                                                                   |
| 99. Have you ever been told by a doctor that you have emphysema                                                                                     | <input type="checkbox"/> <sub>1</sub> Yes<br><input type="checkbox"/> <sub>2</sub> No [If no, skip to Q100]                                                                                                       |
| (a). Were you told this more than six months before this pregnancy?                                                                                 | <input type="checkbox"/> <sub>1</sub> Yes<br><input type="checkbox"/> <sub>2</sub> No                                                                                                                             |
| (b). Were you told this in the last six months before this pregnancy?                                                                               | <input type="checkbox"/> <sub>1</sub> Yes<br><input type="checkbox"/> <sub>2</sub> No                                                                                                                             |
| (c). Were you told this during this pregnancy?                                                                                                      | <input type="checkbox"/> <sub>1</sub> Yes<br><input type="checkbox"/> <sub>2</sub> No                                                                                                                             |
| (i). If yes, in what week of the pregnancy?                                                                                                         | <input type="checkbox"/> <sub>1</sub> 0-4 weeks<br><input type="checkbox"/> <sub>2</sub> 5-8 weeks<br><input type="checkbox"/> <sub>3</sub> 9-12 weeks<br><input type="checkbox"/> <sub>4</sub> 13+ weeks         |
| (d). Have you taken any medication for this problem                                                                                                 | <input type="checkbox"/> <sub>1</sub> Yes<br><input type="checkbox"/> <sub>2</sub> No [If no, skip to Q100]                                                                                                       |
| (i). Name of medication                                                                                                                             | _____                                                                                                                                                                                                             |
| (ii). Do you have the bottle or package that you could show?<br>[Interview to indicate whether bottle or package seen:<br>Seen: Yes _____/No _____] | <input type="checkbox"/> <sub>1</sub> Yes<br><input type="checkbox"/> <sub>2</sub> No                                                                                                                             |
| (iii). Was this prescribed by:                                                                                                                      | <input type="checkbox"/> <sub>1</sub> Doctor<br><input type="checkbox"/> <sub>2</sub> Clinic nurse<br><input type="checkbox"/> <sub>3</sub> None of the above<br><input type="checkbox"/> <sub>4</sub> Don't know |
| (iv). Was this over the counter medication                                                                                                          | <input type="checkbox"/> <sub>1</sub> Yes<br><input type="checkbox"/> <sub>2</sub> No                                                                                                                             |
| (v). No. of days taken                                                                                                                              | _____ days                                                                                                                                                                                                        |
|                                                                                                                                                     |                                                                                                                                                                                                                   |
| 100. Have you ever been told by a doctor that you have TB (or tuberculosis)                                                                         | <input type="checkbox"/> <sub>1</sub> Yes<br><input type="checkbox"/> <sub>2</sub> No [If no, skip to Q101]                                                                                                       |
| (a). Were you told this more than six months before this pregnancy?                                                                                 | <input type="checkbox"/> <sub>1</sub> Yes<br><input type="checkbox"/> <sub>2</sub> No                                                                                                                             |
| (b). Were you told this in the last six months before this pregnancy?                                                                               | <input type="checkbox"/> <sub>1</sub> Yes<br><input type="checkbox"/> <sub>2</sub> No                                                                                                                             |
| (c). Were you told this during this pregnancy?                                                                                                      | <input type="checkbox"/> <sub>1</sub> Yes<br><input type="checkbox"/> <sub>2</sub> No                                                                                                                             |
| (i). If yes, in what week of the pregnancy?                                                                                                         | <input type="checkbox"/> <sub>1</sub> 0-4 weeks<br><input type="checkbox"/> <sub>2</sub> 5-8 weeks<br><input type="checkbox"/> <sub>3</sub> 9-12 weeks<br><input type="checkbox"/> <sub>4</sub> 13+ weeks         |
| (d). Have you taken any medication for this problem                                                                                                 | <input type="checkbox"/> <sub>1</sub> Yes<br><input type="checkbox"/> <sub>2</sub> No [If no, skip to Q101]                                                                                                       |
| (i). Name of medication                                                                                                                             | _____                                                                                                                                                                                                             |
| (ii). Do you have the bottle or package that you could show?<br>[Interview to indicate whether bottle or package seen:<br>Seen: Yes _____/No _____] | <input type="checkbox"/> <sub>1</sub> Yes<br><input type="checkbox"/> <sub>2</sub> No                                                                                                                             |
| (iii). Was this prescribed by:                                                                                                                      | <input type="checkbox"/> <sub>1</sub> Doctor<br><input type="checkbox"/> <sub>2</sub> Clinic nurse<br><input type="checkbox"/> <sub>3</sub> None of the above                                                     |

|                                                                                                                                                     |                                                                                                                                                                                                                   |
|-----------------------------------------------------------------------------------------------------------------------------------------------------|-------------------------------------------------------------------------------------------------------------------------------------------------------------------------------------------------------------------|
|                                                                                                                                                     | <input type="checkbox"/> <sub>4</sub> Don't know                                                                                                                                                                  |
| (iv). Was this over the counter medication                                                                                                          | <input type="checkbox"/> <sub>1</sub> Yes<br><input type="checkbox"/> <sub>2</sub> No                                                                                                                             |
| (v). No. of days taken                                                                                                                              | _____ days                                                                                                                                                                                                        |
|                                                                                                                                                     |                                                                                                                                                                                                                   |
| 101. Have you ever been told by a doctor that you have hayfever?                                                                                    | <input type="checkbox"/> <sub>1</sub> Yes<br><input type="checkbox"/> <sub>2</sub> No <b>[If no, skip to Q102]</b>                                                                                                |
| (a). Were you told this more than six months before this pregnancy?                                                                                 | <input type="checkbox"/> <sub>1</sub> Yes<br><input type="checkbox"/> <sub>2</sub> No                                                                                                                             |
| (b). Were you told this in the last six months before this pregnancy?                                                                               | <input type="checkbox"/> <sub>1</sub> Yes<br><input type="checkbox"/> <sub>2</sub> No                                                                                                                             |
| (c). Were you told this during this pregnancy?                                                                                                      | <input type="checkbox"/> <sub>1</sub> Yes<br><input type="checkbox"/> <sub>2</sub> No                                                                                                                             |
| (i). If yes, in what week of the pregnancy?                                                                                                         | <input type="checkbox"/> <sub>1</sub> 0-4 weeks<br><input type="checkbox"/> <sub>2</sub> 5-8 weeks<br><input type="checkbox"/> <sub>3</sub> 9-12 weeks<br><input type="checkbox"/> <sub>4</sub> 13+ weeks         |
| (d). Have you taken any medication for this problem                                                                                                 | <input type="checkbox"/> <sub>1</sub> Yes<br><input type="checkbox"/> <sub>2</sub> No <b>[If no, skip to Q102]</b>                                                                                                |
| (i). Name of medication                                                                                                                             | _____                                                                                                                                                                                                             |
| (ii). Do you have the bottle or package that you could show?<br>[Interview to indicate whether bottle or package seen:<br>Seen: Yes _____/No _____] | <input type="checkbox"/> <sub>1</sub> Yes<br><input type="checkbox"/> <sub>2</sub> No                                                                                                                             |
| (iii). Was this prescribed by:                                                                                                                      | <input type="checkbox"/> <sub>1</sub> Doctor<br><input type="checkbox"/> <sub>2</sub> Clinic nurse<br><input type="checkbox"/> <sub>3</sub> None of the above<br><input type="checkbox"/> <sub>4</sub> Don't know |
| (iv). Was this over the counter medication                                                                                                          | <input type="checkbox"/> <sub>1</sub> Yes<br><input type="checkbox"/> <sub>2</sub> No                                                                                                                             |
| (v). No. of days taken                                                                                                                              | _____ days                                                                                                                                                                                                        |
|                                                                                                                                                     |                                                                                                                                                                                                                   |
| 102. Have you ever been told by a doctor that you have an allergy?                                                                                  | <input type="checkbox"/> <sub>1</sub> Yes<br><input type="checkbox"/> <sub>2</sub> No <b>[If no, skip to Q103]</b>                                                                                                |
| (a). Were you told this more than six months before this pregnancy?                                                                                 | <input type="checkbox"/> <sub>1</sub> Yes<br><input type="checkbox"/> <sub>2</sub> No                                                                                                                             |
| (b). Were you told this in the last six months before this pregnancy?                                                                               | <input type="checkbox"/> <sub>1</sub> Yes<br><input type="checkbox"/> <sub>2</sub> No                                                                                                                             |
| (c). Were you told this during this pregnancy?                                                                                                      | <input type="checkbox"/> <sub>1</sub> Yes<br><input type="checkbox"/> <sub>2</sub> No                                                                                                                             |
| (i). If yes, in what week of the pregnancy?                                                                                                         | <input type="checkbox"/> <sub>1</sub> 0-4 weeks<br><input type="checkbox"/> <sub>2</sub> 5-8 weeks<br><input type="checkbox"/> <sub>3</sub> 9-12 weeks<br><input type="checkbox"/> <sub>4</sub> 13+ weeks         |
| (d). Have you taken any medication for this problem                                                                                                 | <input type="checkbox"/> <sub>1</sub> Yes<br><input type="checkbox"/> <sub>2</sub> No <b>[If no, skip to Q103]</b>                                                                                                |
| (i). Name of medication                                                                                                                             | _____                                                                                                                                                                                                             |
| (ii). Do you have the bottle or package that you could show?<br>[Interview to indicate whether bottle or package seen:<br>Seen: Yes _____/No _____] | <input type="checkbox"/> <sub>1</sub> Yes<br><input type="checkbox"/> <sub>2</sub> No                                                                                                                             |
| (iii). Was this prescribed by:                                                                                                                      | <input type="checkbox"/> <sub>1</sub> Doctor<br><input type="checkbox"/> <sub>2</sub> Clinic nurse<br><input type="checkbox"/> <sub>3</sub> None of the above                                                     |

|                                                                                                                                                      |                                                                                                                                                                                                                                                                                                                                                                                                      |
|------------------------------------------------------------------------------------------------------------------------------------------------------|------------------------------------------------------------------------------------------------------------------------------------------------------------------------------------------------------------------------------------------------------------------------------------------------------------------------------------------------------------------------------------------------------|
|                                                                                                                                                      | <input type="checkbox"/> <sub>4</sub> Don't know                                                                                                                                                                                                                                                                                                                                                     |
| (iv). Was this over the counter medication                                                                                                           | <input type="checkbox"/> <sub>1</sub> Yes<br><input type="checkbox"/> <sub>2</sub> No                                                                                                                                                                                                                                                                                                                |
| (v). No. of days taken                                                                                                                               | _____ days                                                                                                                                                                                                                                                                                                                                                                                           |
| (e). What were you told you were allergic too?                                                                                                       | <input type="checkbox"/> <sub>1</sub> food<br><input type="checkbox"/> <sub>2</sub> pollen<br><input type="checkbox"/> <sub>3</sub> animal hair<br><input type="checkbox"/> <sub>4</sub> medication<br><input type="checkbox"/> <sub>88</sub> other: _____                                                                                                                                           |
|                                                                                                                                                      |                                                                                                                                                                                                                                                                                                                                                                                                      |
| 103. Have you ever been told by a doctor that you have one or more of the following skin problems                                                    | <input type="checkbox"/> <sub>1</sub> Eczema<br><input type="checkbox"/> <sub>2</sub> Urticaria (hives)<br><input type="checkbox"/> <sub>3</sub> Psoriasis<br><input type="checkbox"/> <sub>4</sub> Cold sores (herpes)<br><input type="checkbox"/> <sub>5</sub> Acne<br><input type="checkbox"/> <sub>6</sub> Other: _____<br><input type="checkbox"/> <sub>7</sub> No <b>[If no, skip to Q104]</b> |
| (a). Were you told this more than six months before this pregnancy?                                                                                  | <input type="checkbox"/> <sub>1</sub> Yes<br><input type="checkbox"/> <sub>2</sub> No                                                                                                                                                                                                                                                                                                                |
| (b). Were you told this in the last six months before this pregnancy?                                                                                | <input type="checkbox"/> <sub>1</sub> Yes<br><input type="checkbox"/> <sub>2</sub> No                                                                                                                                                                                                                                                                                                                |
| (c). Were you told this during this pregnancy?                                                                                                       | <input type="checkbox"/> <sub>1</sub> Yes<br><input type="checkbox"/> <sub>2</sub> No                                                                                                                                                                                                                                                                                                                |
| (i). If yes, in what week of the pregnancy?                                                                                                          | <input type="checkbox"/> <sub>1</sub> 0-4 weeks<br><input type="checkbox"/> <sub>2</sub> 5-8 weeks<br><input type="checkbox"/> <sub>3</sub> 9-12 weeks<br><input type="checkbox"/> <sub>4</sub> 13+ weeks                                                                                                                                                                                            |
| (d). Have you taken any medication for this problem                                                                                                  | <input type="checkbox"/> <sub>1</sub> Yes<br><input type="checkbox"/> <sub>2</sub> No <b>[If no, skip to Q104]</b>                                                                                                                                                                                                                                                                                   |
| (i). Name of medication                                                                                                                              | _____ (skin disease: _____)<br>_____ (skin disease: _____)                                                                                                                                                                                |
| (ii). Do you have the bottle or package that you could show?<br>[Interview to indicate whether bottle or package seen:<br>Seen: Yes _____ /No _____] | <input type="checkbox"/> <sub>1</sub> Yes<br><input type="checkbox"/> <sub>2</sub> No                                                                                                                                                                                                                                                                                                                |
| (iii). Was this prescribed by:                                                                                                                       | <input type="checkbox"/> <sub>1</sub> Doctor<br><input type="checkbox"/> <sub>2</sub> Clinic nurse<br><input type="checkbox"/> <sub>3</sub> None of the above<br><input type="checkbox"/> <sub>4</sub> Don't know                                                                                                                                                                                    |
| (iv). Was this over the counter medication                                                                                                           | <input type="checkbox"/> <sub>1</sub> Yes<br><input type="checkbox"/> <sub>2</sub> No                                                                                                                                                                                                                                                                                                                |
| (v). No. of days taken                                                                                                                               | _____ days                                                                                                                                                                                                                                                                                                                                                                                           |
|                                                                                                                                                      |                                                                                                                                                                                                                                                                                                                                                                                                      |
| 104. Have you ever been told by a doctor that you have diabetes                                                                                      | <input type="checkbox"/> <sub>1</sub> Yes<br><input type="checkbox"/> <sub>2</sub> No <b>[If no, skip to Q105]</b>                                                                                                                                                                                                                                                                                   |
| (a). Were you told this more than six months before this pregnancy?                                                                                  | <input type="checkbox"/> <sub>1</sub> Yes<br><input type="checkbox"/> <sub>2</sub> No                                                                                                                                                                                                                                                                                                                |
| (i). If yes, was this in a previous pregnancy?                                                                                                       | <input type="checkbox"/> <sub>1</sub> Yes<br><input type="checkbox"/> <sub>2</sub> No                                                                                                                                                                                                                                                                                                                |

|                                                                                                                                                     |                                                                                                                                                                                                                   |
|-----------------------------------------------------------------------------------------------------------------------------------------------------|-------------------------------------------------------------------------------------------------------------------------------------------------------------------------------------------------------------------|
| (ii) If yes, was your blood sugar normal after the pregnancy?                                                                                       | <input type="checkbox"/> <sub>1</sub> Yes<br><input type="checkbox"/> <sub>2</sub> No                                                                                                                             |
| (b). Were you told this in the last six months before this pregnancy?                                                                               | <input type="checkbox"/> <sub>1</sub> Yes<br><input type="checkbox"/> <sub>2</sub> No                                                                                                                             |
| (c). Were you told this during this pregnancy?                                                                                                      | <input type="checkbox"/> <sub>1</sub> Yes<br><input type="checkbox"/> <sub>2</sub> No                                                                                                                             |
| (i). If yes, in what week of the pregnancy?                                                                                                         | <input type="checkbox"/> <sub>1</sub> 0-4 weeks<br><input type="checkbox"/> <sub>2</sub> 5-8 weeks<br><input type="checkbox"/> <sub>3</sub> 9-12 weeks<br><input type="checkbox"/> <sub>4</sub> 13+ weeks         |
| (ii). Are you <u>now</u> taking insulin?                                                                                                            | <input type="checkbox"/> <sub>1</sub> Yes<br><input type="checkbox"/> <sub>2</sub> No                                                                                                                             |
| (iii). Was this prescribed by:                                                                                                                      | <input type="checkbox"/> <sub>1</sub> Doctor<br><input type="checkbox"/> <sub>2</sub> Clinic nurse<br><input type="checkbox"/> <sub>3</sub> None of the above<br><input type="checkbox"/> <sub>4</sub> Don't know |
| (iv). Name of medication                                                                                                                            | _____                                                                                                                                                                                                             |
| (v). Do you have the bottle or package that you could show?<br>[Interview to indicate whether bottle or package seen:<br>Seen: Yes _____/No _____]  | <input type="checkbox"/> <sub>1</sub> Yes<br><input type="checkbox"/> <sub>2</sub> No                                                                                                                             |
| (vi). Was this prescribed by a doctor                                                                                                               | <input type="checkbox"/> <sub>1</sub> Yes<br><input type="checkbox"/> <sub>2</sub> No                                                                                                                             |
| (vii). Was this over the counter medication                                                                                                         | <input type="checkbox"/> <sub>1</sub> Yes<br><input type="checkbox"/> <sub>2</sub> No                                                                                                                             |
| (viii). No. of days taken                                                                                                                           | _____ days                                                                                                                                                                                                        |
| <b>Heart / Blood / Metabolism / Blood vessels</b>                                                                                                   |                                                                                                                                                                                                                   |
| 105. Have you ever been told by a doctor that you have heart defect since birth (a congenital heart defect)?                                        | <input type="checkbox"/> <sub>1</sub> Yes<br><input type="checkbox"/> <sub>2</sub> No <b>[If no, skip to Q106]</b>                                                                                                |
| (a). Were you told this more than six months before this pregnancy?                                                                                 | <input type="checkbox"/> <sub>1</sub> Yes<br><input type="checkbox"/> <sub>2</sub> No                                                                                                                             |
| (b). Were you told this in the last six months before this pregnancy?                                                                               | <input type="checkbox"/> <sub>1</sub> Yes<br><input type="checkbox"/> <sub>2</sub> No                                                                                                                             |
| (c). Were you told this during this pregnancy?                                                                                                      | <input type="checkbox"/> <sub>1</sub> Yes<br><input type="checkbox"/> <sub>2</sub> No                                                                                                                             |
| (i). If yes, in what week of the pregnancy?                                                                                                         | <input type="checkbox"/> <sub>1</sub> 0-4 weeks<br><input type="checkbox"/> <sub>2</sub> 5-8 weeks<br><input type="checkbox"/> <sub>3</sub> 9-12 weeks<br><input type="checkbox"/> <sub>4</sub> 13+ weeks         |
| (d). Have you taken any medication for this problem                                                                                                 | <input type="checkbox"/> <sub>1</sub> Yes<br><input type="checkbox"/> <sub>2</sub> No <b>[If no, skip to Q106]</b>                                                                                                |
| (i). Name of medication                                                                                                                             | _____                                                                                                                                                                                                             |
| (ii). Do you have the bottle or package that you could show?<br>[Interview to indicate whether bottle or package seen:<br>Seen: Yes _____/No _____] | <input type="checkbox"/> <sub>1</sub> Yes<br><input type="checkbox"/> <sub>2</sub> No                                                                                                                             |
| (iii). Was this prescribed by:                                                                                                                      | <input type="checkbox"/> <sub>1</sub> Doctor<br><input type="checkbox"/> <sub>2</sub> Clinic nurse<br><input type="checkbox"/> <sub>3</sub> None of the above<br><input type="checkbox"/> <sub>4</sub> Don't know |
| (iv). Was this over the counter medication                                                                                                          | <input type="checkbox"/> <sub>1</sub> Yes<br><input type="checkbox"/> <sub>2</sub> No                                                                                                                             |
| (v). No. of days taken                                                                                                                              | _____ days                                                                                                                                                                                                        |

|                                                                                                                                                     |                                                                                                                                                                                                                   |
|-----------------------------------------------------------------------------------------------------------------------------------------------------|-------------------------------------------------------------------------------------------------------------------------------------------------------------------------------------------------------------------|
| 106. Have you ever been told by a doctor that you have any other heart disease                                                                      | <input type="checkbox"/> <sub>1</sub> Yes<br><input type="checkbox"/> <sub>2</sub> No <b>[If no, skip to Q107]</b>                                                                                                |
| (a). If yes, please describe                                                                                                                        | _____                                                                                                                                                                                                             |
| (b). Were you told this more than six months before this pregnancy?                                                                                 | <input type="checkbox"/> <sub>1</sub> Yes<br><input type="checkbox"/> <sub>2</sub> No                                                                                                                             |
| (c). Were you told this in the last six months before this pregnancy?                                                                               | <input type="checkbox"/> <sub>1</sub> Yes<br><input type="checkbox"/> <sub>2</sub> No                                                                                                                             |
| (d). Were you told this during this pregnancy?                                                                                                      | <input type="checkbox"/> <sub>1</sub> Yes<br><input type="checkbox"/> <sub>2</sub> No                                                                                                                             |
| (i). If yes, in what week of the pregnancy?                                                                                                         | <input type="checkbox"/> <sub>1</sub> 0-4 weeks<br><input type="checkbox"/> <sub>2</sub> 5-8 weeks<br><input type="checkbox"/> <sub>3</sub> 9-12 weeks<br><input type="checkbox"/> <sub>4</sub> 13+ weeks         |
| (e). Have you taken any medication for this problem                                                                                                 | <input type="checkbox"/> <sub>1</sub> Yes<br><input type="checkbox"/> <sub>2</sub> No <b>[If no, skip to Q107]</b>                                                                                                |
| (i). Name of medication                                                                                                                             | _____                                                                                                                                                                                                             |
| (ii). Do you have the bottle or package that you could show?<br>[Interview to indicate whether bottle or package seen:<br>Seen: Yes _____/No _____] | <input type="checkbox"/> <sub>1</sub> Yes<br><input type="checkbox"/> <sub>2</sub> No                                                                                                                             |
| (iii). Was this prescribed by:                                                                                                                      | <input type="checkbox"/> <sub>1</sub> Doctor<br><input type="checkbox"/> <sub>2</sub> Clinic nurse<br><input type="checkbox"/> <sub>3</sub> None of the above<br><input type="checkbox"/> <sub>4</sub> Don't know |
| (iv). Was this over the counter medication                                                                                                          | <input type="checkbox"/> <sub>1</sub> Yes<br><input type="checkbox"/> <sub>2</sub> No                                                                                                                             |
| (v). No. of days taken                                                                                                                              | _____ days                                                                                                                                                                                                        |
| 107. Have you ever been told by a doctor that you have high cholesterol                                                                             | <input type="checkbox"/> <sub>1</sub> Yes<br><input type="checkbox"/> <sub>2</sub> No <b>[If no, skip to Q108]</b>                                                                                                |
| (a). Were you told this more than six months before this pregnancy?                                                                                 | <input type="checkbox"/> <sub>1</sub> Yes<br><input type="checkbox"/> <sub>2</sub> No                                                                                                                             |
| (b). Were you told this in the last six months before this pregnancy?                                                                               | <input type="checkbox"/> <sub>1</sub> Yes<br><input type="checkbox"/> <sub>2</sub> No                                                                                                                             |
| (c). Were you told this during this pregnancy?                                                                                                      | <input type="checkbox"/> <sub>1</sub> Yes<br><input type="checkbox"/> <sub>2</sub> No                                                                                                                             |
| (i). If yes, in what week of the pregnancy?                                                                                                         | <input type="checkbox"/> <sub>1</sub> 0-4 weeks<br><input type="checkbox"/> <sub>2</sub> 5-8 weeks<br><input type="checkbox"/> <sub>3</sub> 9-12 weeks<br><input type="checkbox"/> <sub>4</sub> 13+ weeks         |
| (d). Have you taken any medication for this problem                                                                                                 | <input type="checkbox"/> <sub>1</sub> Yes<br><input type="checkbox"/> <sub>2</sub> No <b>[If no, skip to Q108]</b>                                                                                                |
| (i). Name of medication                                                                                                                             | _____                                                                                                                                                                                                             |
| (ii). Do you have the bottle or package that you could show?<br>[Interview to indicate whether bottle or package seen:<br>Seen: Yes _____/No _____] | <input type="checkbox"/> <sub>1</sub> Yes<br><input type="checkbox"/> <sub>2</sub> No                                                                                                                             |
| (iii). Was this prescribed by:                                                                                                                      | <input type="checkbox"/> <sub>1</sub> Doctor<br><input type="checkbox"/> <sub>2</sub> Clinic nurse<br><input type="checkbox"/> <sub>3</sub> None of the above<br><input type="checkbox"/> <sub>4</sub> Don't know |
| (iv). Was this over the counter medication                                                                                                          | <input type="checkbox"/> <sub>1</sub> Yes<br><input type="checkbox"/> <sub>2</sub> No                                                                                                                             |
| (v). No. of days taken                                                                                                                              | _____ days                                                                                                                                                                                                        |

|                                                                                                                                                     |                                                                                                                                                                                                                   |
|-----------------------------------------------------------------------------------------------------------------------------------------------------|-------------------------------------------------------------------------------------------------------------------------------------------------------------------------------------------------------------------|
| 108. Have you ever been told by a doctor that you have high blood pressure?                                                                         | <input type="checkbox"/> <sub>1</sub> Yes<br><input type="checkbox"/> <sub>2</sub> No <b>[If no, skip to Q109]</b>                                                                                                |
| (a). Were you told this more than six months before this pregnancy?                                                                                 | <input type="checkbox"/> <sub>1</sub> Yes<br><input type="checkbox"/> <sub>2</sub> No                                                                                                                             |
| (i). If yes, was this in a previous pregnancy?                                                                                                      | <input type="checkbox"/> <sub>1</sub> Yes<br><input type="checkbox"/> <sub>2</sub> No                                                                                                                             |
| (ii). If yes, was your blood pressure normal after the pregnancy?                                                                                   | <input type="checkbox"/> <sub>1</sub> Yes<br><input type="checkbox"/> <sub>2</sub> No                                                                                                                             |
| (b). Were you told this in the last six months before this pregnancy?                                                                               | <input type="checkbox"/> <sub>1</sub> Yes<br><input type="checkbox"/> <sub>2</sub> No                                                                                                                             |
| (c). Were you told this during this pregnancy?                                                                                                      | <input type="checkbox"/> <sub>1</sub> Yes<br><input type="checkbox"/> <sub>2</sub> No                                                                                                                             |
| (i). If yes, in what week of the pregnancy?                                                                                                         | <input type="checkbox"/> <sub>1</sub> 0-4 weeks<br><input type="checkbox"/> <sub>2</sub> 5-8 weeks<br><input type="checkbox"/> <sub>3</sub> 9-12 weeks<br><input type="checkbox"/> <sub>4</sub> 13+ weeks         |
| (d). Have you taken any medication for this problem                                                                                                 | <input type="checkbox"/> <sub>1</sub> Yes<br><input type="checkbox"/> <sub>2</sub> No <b>[If no, skip to Q109]</b>                                                                                                |
| (i). Name of medication                                                                                                                             | _____                                                                                                                                                                                                             |
| (ii). Do you have the bottle or package that you could show?<br>[Interview to indicate whether bottle or package seen:<br>Seen: Yes _____/No _____] | <input type="checkbox"/> <sub>1</sub> Yes<br><input type="checkbox"/> <sub>2</sub> No                                                                                                                             |
| (iii). Was this prescribed by:                                                                                                                      | <input type="checkbox"/> <sub>1</sub> Doctor<br><input type="checkbox"/> <sub>2</sub> Clinic nurse<br><input type="checkbox"/> <sub>3</sub> None of the above<br><input type="checkbox"/> <sub>4</sub> Don't know |
| (iv). Was this over the counter medication                                                                                                          | <input type="checkbox"/> <sub>1</sub> Yes<br><input type="checkbox"/> <sub>2</sub> No                                                                                                                             |
| (v). No. of days taken                                                                                                                              | _____ days                                                                                                                                                                                                        |
| 109. Have you ever been told by a doctor that you have hypothyroidism or hyperthyroidism                                                            | <input type="checkbox"/> <sub>1</sub> Yes<br><input type="checkbox"/> <sub>2</sub> No <b>[If no, skip to Q110]</b>                                                                                                |
| (a). Were you told this more than six months before this pregnancy?                                                                                 | <input type="checkbox"/> <sub>1</sub> Yes<br><input type="checkbox"/> <sub>2</sub> No                                                                                                                             |
| (b). Were you told this in the last six months before this pregnancy?                                                                               | <input type="checkbox"/> <sub>1</sub> Yes<br><input type="checkbox"/> <sub>2</sub> No                                                                                                                             |
| (c). Were you told this during this pregnancy?                                                                                                      | <input type="checkbox"/> <sub>1</sub> Yes<br><input type="checkbox"/> <sub>2</sub> No                                                                                                                             |
| (i). If yes, in what week of the pregnancy?                                                                                                         | <input type="checkbox"/> <sub>1</sub> 0-4 weeks<br><input type="checkbox"/> <sub>2</sub> 5-8 weeks<br><input type="checkbox"/> <sub>3</sub> 9-12 weeks<br><input type="checkbox"/> <sub>4</sub> 13+ weeks         |
| (d). Have you taken any medication for this problem                                                                                                 | <input type="checkbox"/> <sub>1</sub> Yes<br><input type="checkbox"/> <sub>2</sub> No <b>[If no, skip to Q110]</b>                                                                                                |
| (i). Name of medication                                                                                                                             | _____                                                                                                                                                                                                             |
| (ii). Do you have the bottle or package that you could show?<br>[Interview to indicate whether bottle or package seen:<br>Seen: Yes _____/No _____] | <input type="checkbox"/> <sub>1</sub> Yes<br><input type="checkbox"/> <sub>2</sub> No                                                                                                                             |
| (iii). Was this prescribed by:                                                                                                                      | <input type="checkbox"/> <sub>1</sub> Doctor<br><input type="checkbox"/> <sub>2</sub> Clinic nurse<br><input type="checkbox"/> <sub>3</sub> None of the above                                                     |



|                                                                                                                                                     |                                                                                                                                                                                                                   |
|-----------------------------------------------------------------------------------------------------------------------------------------------------|-------------------------------------------------------------------------------------------------------------------------------------------------------------------------------------------------------------------|
|                                                                                                                                                     | <input type="checkbox"/> <sub>4</sub> Don't know                                                                                                                                                                  |
| (iv). Was this over the counter medication                                                                                                          | <input type="checkbox"/> <sub>1</sub> Yes<br><input type="checkbox"/> <sub>2</sub> No                                                                                                                             |
| (v). No. of days taken                                                                                                                              | _____ days                                                                                                                                                                                                        |
|                                                                                                                                                     |                                                                                                                                                                                                                   |
| 110. Have you ever been told by a doctor that you have anaemia                                                                                      | <input type="checkbox"/> <sub>1</sub> Yes<br><input type="checkbox"/> <sub>2</sub> No <b>[If no, skip to Q111]</b>                                                                                                |
| (a). Were you told this more than six months before this pregnancy?                                                                                 | <input type="checkbox"/> <sub>1</sub> Yes<br><input type="checkbox"/> <sub>2</sub> No                                                                                                                             |
| (b). Were you told this in the last six months before this pregnancy?                                                                               | <input type="checkbox"/> <sub>1</sub> Yes<br><input type="checkbox"/> <sub>2</sub> No                                                                                                                             |
| (c). Were you told this during this pregnancy?                                                                                                      | <input type="checkbox"/> <sub>1</sub> Yes<br><input type="checkbox"/> <sub>2</sub> No                                                                                                                             |
| (i). If yes, in what week of the pregnancy?                                                                                                         | <input type="checkbox"/> <sub>1</sub> 0-4 weeks<br><input type="checkbox"/> <sub>2</sub> 5-8 weeks<br><input type="checkbox"/> <sub>3</sub> 9-12 weeks<br><input type="checkbox"/> <sub>4</sub> 13+ weeks         |
| (d). Have you taken any medication for this problem                                                                                                 | <input type="checkbox"/> <sub>1</sub> Yes<br><input type="checkbox"/> <sub>2</sub> No <b>[If no, skip to Q111]</b>                                                                                                |
| (i). Name of medication                                                                                                                             | _____                                                                                                                                                                                                             |
| (ii). Do you have the bottle or package that you could show?<br>[Interview to indicate whether bottle or package seen:<br>Seen: Yes _____/No _____] | <input type="checkbox"/> <sub>1</sub> Yes<br><input type="checkbox"/> <sub>2</sub> No                                                                                                                             |
| (iii). Was this prescribed by:                                                                                                                      | <input type="checkbox"/> <sub>1</sub> Doctor<br><input type="checkbox"/> <sub>2</sub> Clinic nurse<br><input type="checkbox"/> <sub>3</sub> None of the above<br><input type="checkbox"/> <sub>4</sub> Don't know |
| (iv). Was this over the counter medication                                                                                                          | <input type="checkbox"/> <sub>1</sub> Yes<br><input type="checkbox"/> <sub>2</sub> No                                                                                                                             |
| (v). No. of days taken                                                                                                                              | _____ days                                                                                                                                                                                                        |
|                                                                                                                                                     |                                                                                                                                                                                                                   |
| 111. Have you ever been told by a doctor that you have B-12/folic acid insufficiency                                                                | <input type="checkbox"/> <sub>1</sub> Yes<br><input type="checkbox"/> <sub>2</sub> No <b>[If no, skip to Q112]</b>                                                                                                |
| (a). Were you told this more than six months before this pregnancy?                                                                                 | <input type="checkbox"/> <sub>1</sub> Yes<br><input type="checkbox"/> <sub>2</sub> No                                                                                                                             |
| (b). Were you told this in the last six months before this pregnancy?                                                                               | <input type="checkbox"/> <sub>1</sub> Yes<br><input type="checkbox"/> <sub>2</sub> No                                                                                                                             |
| (c). Were you told this during this pregnancy?                                                                                                      | <input type="checkbox"/> <sub>1</sub> Yes<br><input type="checkbox"/> <sub>2</sub> No                                                                                                                             |
| (i). If yes, in what week of the pregnancy?                                                                                                         | <input type="checkbox"/> <sub>1</sub> 0-4 weeks<br><input type="checkbox"/> <sub>2</sub> 5-8 weeks<br><input type="checkbox"/> <sub>3</sub> 9-12 weeks<br><input type="checkbox"/> <sub>4</sub> 13+ weeks         |
| (d). Have you taken any medication for this problem                                                                                                 | <input type="checkbox"/> <sub>1</sub> Yes<br><input type="checkbox"/> <sub>2</sub> No <b>[If no, skip to Q112]</b>                                                                                                |
| (i). Name of medication                                                                                                                             | _____                                                                                                                                                                                                             |
| (ii). Do you have the bottle or package that you could show?<br>[Interview to indicate whether bottle or package seen:<br>Seen: Yes _____/No _____] | <input type="checkbox"/> <sub>1</sub> Yes<br><input type="checkbox"/> <sub>2</sub> No                                                                                                                             |
| (iii). Was this prescribed by:                                                                                                                      | <input type="checkbox"/> <sub>1</sub> Doctor<br><input type="checkbox"/> <sub>2</sub> Clinic nurse<br><input type="checkbox"/> <sub>3</sub> None of the above                                                     |

|                                                                                                                                                     |                                                                                                                                                                                                                   |
|-----------------------------------------------------------------------------------------------------------------------------------------------------|-------------------------------------------------------------------------------------------------------------------------------------------------------------------------------------------------------------------|
|                                                                                                                                                     | <input type="checkbox"/> <sub>4</sub> Don't know                                                                                                                                                                  |
| (iv). Was this over the counter medication                                                                                                          | <input type="checkbox"/> <sub>1</sub> Yes<br><input type="checkbox"/> <sub>2</sub> No                                                                                                                             |
| (v). No. of days taken                                                                                                                              | _____ days                                                                                                                                                                                                        |
| <b>Gastrointestinal</b>                                                                                                                             |                                                                                                                                                                                                                   |
| 112. Have you ever been told by a doctor that you have Hepatitis/jaundice/                                                                          | <input type="checkbox"/> <sub>1</sub> Yes<br><input type="checkbox"/> <sub>2</sub> No <b>[If no, skip to Q113]</b>                                                                                                |
| (a). Were you told this more than six months before this pregnancy?                                                                                 | <input type="checkbox"/> <sub>1</sub> Yes<br><input type="checkbox"/> <sub>2</sub> No                                                                                                                             |
| (b). Were you told this in the last six months before this pregnancy?                                                                               | <input type="checkbox"/> <sub>1</sub> Yes<br><input type="checkbox"/> <sub>2</sub> No                                                                                                                             |
| (c). Were you told this during this pregnancy?                                                                                                      | <input type="checkbox"/> <sub>1</sub> Yes<br><input type="checkbox"/> <sub>2</sub> No                                                                                                                             |
| (i). If yes, in what week of the pregnancy?                                                                                                         | <input type="checkbox"/> <sub>1</sub> 0-4 weeks<br><input type="checkbox"/> <sub>2</sub> 5-8 weeks<br><input type="checkbox"/> <sub>3</sub> 9-12 weeks<br><input type="checkbox"/> <sub>4</sub> 13+ weeks         |
| (d). Have you taken any medication for this problem                                                                                                 | <input type="checkbox"/> <sub>1</sub> Yes<br><input type="checkbox"/> <sub>2</sub> No <b>[If no, skip to Q113]</b>                                                                                                |
| (i). Name of medication                                                                                                                             | _____                                                                                                                                                                                                             |
| (ii). Do you have the bottle or package that you could show?<br>[Interview to indicate whether bottle or package seen:<br>Seen: Yes _____/No _____] | <input type="checkbox"/> <sub>1</sub> Yes<br><input type="checkbox"/> <sub>2</sub> No                                                                                                                             |
| (iii). Was this prescribed by:                                                                                                                      | <input type="checkbox"/> <sub>1</sub> Doctor<br><input type="checkbox"/> <sub>2</sub> Clinic nurse<br><input type="checkbox"/> <sub>3</sub> None of the above<br><input type="checkbox"/> <sub>4</sub> Don't know |
| (iv). Was this over the counter medication                                                                                                          | <input type="checkbox"/> <sub>1</sub> Yes<br><input type="checkbox"/> <sub>2</sub> No                                                                                                                             |
| (v). No. of days taken                                                                                                                              | _____ days                                                                                                                                                                                                        |
| <b>113. Have you ever been told by a doctor that you have Gall stones</b>                                                                           |                                                                                                                                                                                                                   |
|                                                                                                                                                     | <input type="checkbox"/> <sub>1</sub> Yes<br><input type="checkbox"/> <sub>2</sub> No <b>[If no, skip to Q114]</b>                                                                                                |
| (a). Were you told this more than six months before this pregnancy?                                                                                 | <input type="checkbox"/> <sub>1</sub> Yes<br><input type="checkbox"/> <sub>2</sub> No                                                                                                                             |
| (b). Were you told this in the last six months before this pregnancy?                                                                               | <input type="checkbox"/> <sub>1</sub> Yes<br><input type="checkbox"/> <sub>2</sub> No                                                                                                                             |
| (c). Were you told this during this pregnancy?                                                                                                      | <input type="checkbox"/> <sub>1</sub> Yes<br><input type="checkbox"/> <sub>2</sub> No                                                                                                                             |
| (i). If yes, in what week of the pregnancy?                                                                                                         | <input type="checkbox"/> <sub>1</sub> 0-4 weeks<br><input type="checkbox"/> <sub>2</sub> 5-8 weeks<br><input type="checkbox"/> <sub>3</sub> 9-12 weeks<br><input type="checkbox"/> <sub>4</sub> 13+ weeks         |
| (d). Have you taken any medication for this problem                                                                                                 | <input type="checkbox"/> <sub>1</sub> Yes<br><input type="checkbox"/> <sub>2</sub> No <b>[If no, skip to Q114]</b>                                                                                                |
| (i). Name of medication                                                                                                                             | _____                                                                                                                                                                                                             |
| (ii). Do you have the bottle or package that you could show?<br>[Interview to indicate whether bottle or package seen:<br>Seen: Yes _____/No _____] | <input type="checkbox"/> <sub>1</sub> Yes<br><input type="checkbox"/> <sub>2</sub> No                                                                                                                             |
| (iii). Was this prescribed by:                                                                                                                      | <input type="checkbox"/> <sub>1</sub> Doctor<br><input type="checkbox"/> <sub>2</sub> Clinic nurse<br><input type="checkbox"/> <sub>3</sub> None of the above                                                     |

|                                                                                                                                                     |                                                                                                                                                                                                                   |
|-----------------------------------------------------------------------------------------------------------------------------------------------------|-------------------------------------------------------------------------------------------------------------------------------------------------------------------------------------------------------------------|
|                                                                                                                                                     | <input type="checkbox"/> <sub>4</sub> Don't know                                                                                                                                                                  |
| (iv). Was this over the counter medication                                                                                                          | <input type="checkbox"/> <sub>1</sub> Yes<br><input type="checkbox"/> <sub>2</sub> No                                                                                                                             |
| (v). No. of days taken                                                                                                                              | _____ days                                                                                                                                                                                                        |
|                                                                                                                                                     |                                                                                                                                                                                                                   |
| 114. Have you ever been told by a doctor that you have stomach ulcer                                                                                | <input type="checkbox"/> <sub>1</sub> Yes<br><input type="checkbox"/> <sub>2</sub> No <b>[If no, skip to Q115]</b>                                                                                                |
| (a). Were you told this more than six months before this pregnancy?                                                                                 | <input type="checkbox"/> <sub>1</sub> Yes<br><input type="checkbox"/> <sub>2</sub> No                                                                                                                             |
| (b). Were you told this in the last six months before this pregnancy?                                                                               | <input type="checkbox"/> <sub>1</sub> Yes<br><input type="checkbox"/> <sub>2</sub> No                                                                                                                             |
| (c). Were you told this during this pregnancy?                                                                                                      | <input type="checkbox"/> <sub>1</sub> Yes<br><input type="checkbox"/> <sub>2</sub> No                                                                                                                             |
| (i). If yes, in what week of the pregnancy?                                                                                                         | <input type="checkbox"/> <sub>1</sub> 0-4 weeks<br><input type="checkbox"/> <sub>2</sub> 5-8 weeks<br><input type="checkbox"/> <sub>3</sub> 9-12 weeks<br><input type="checkbox"/> <sub>4</sub> 13+ weeks         |
| (d). Have you taken any medication for this problem                                                                                                 | <input type="checkbox"/> <sub>1</sub> Yes<br><input type="checkbox"/> <sub>2</sub> No <b>[If no, skip to Q115]</b>                                                                                                |
| (i). Name of medication                                                                                                                             | _____                                                                                                                                                                                                             |
| (ii). Do you have the bottle or package that you could show?<br>[Interview to indicate whether bottle or package seen:<br>Seen: Yes _____/No _____] | <input type="checkbox"/> <sub>1</sub> Yes<br><input type="checkbox"/> <sub>2</sub> No                                                                                                                             |
| (iii). Was this prescribed by:                                                                                                                      | <input type="checkbox"/> <sub>1</sub> Doctor<br><input type="checkbox"/> <sub>2</sub> Clinic nurse<br><input type="checkbox"/> <sub>3</sub> None of the above<br><input type="checkbox"/> <sub>4</sub> Don't know |
| (iv). Was this over the counter medication                                                                                                          | <input type="checkbox"/> <sub>1</sub> Yes<br><input type="checkbox"/> <sub>2</sub> No                                                                                                                             |
| (v). No. of days taken                                                                                                                              | _____ days                                                                                                                                                                                                        |
|                                                                                                                                                     |                                                                                                                                                                                                                   |
| 115. Have you ever been told by a doctor that you have other gastro-intestinal problems                                                             | <input type="checkbox"/> <sub>1</sub> Yes<br><input type="checkbox"/> <sub>2</sub> No <b>[If no, skip to Q116]</b>                                                                                                |
| (a). If yes, please describe                                                                                                                        | _____                                                                                                                                                                                                             |
| (b). Were you told this more than six months before this pregnancy?                                                                                 | <input type="checkbox"/> <sub>1</sub> Yes<br><input type="checkbox"/> <sub>2</sub> No                                                                                                                             |
| (c). Were you told this in the last six months before this pregnancy?                                                                               | <input type="checkbox"/> <sub>1</sub> Yes<br><input type="checkbox"/> <sub>2</sub> No                                                                                                                             |
| (d). Were you told this during this pregnancy?                                                                                                      | <input type="checkbox"/> <sub>1</sub> Yes<br><input type="checkbox"/> <sub>2</sub> No                                                                                                                             |
| (i). If yes, in what week of the pregnancy?                                                                                                         | <input type="checkbox"/> <sub>1</sub> 0-4 weeks<br><input type="checkbox"/> <sub>2</sub> 5-8 weeks<br><input type="checkbox"/> <sub>3</sub> 9-12 weeks<br><input type="checkbox"/> <sub>4</sub> 13+ weeks         |
| (e). Have you taken any medication for this problem                                                                                                 | <input type="checkbox"/> <sub>1</sub> Yes<br><input type="checkbox"/> <sub>2</sub> No <b>[If no, skip to Q116]</b>                                                                                                |
| (i). Name of medication                                                                                                                             | _____                                                                                                                                                                                                             |
| (ii). Do you have the bottle or package that you could show?<br>[Interview to indicate whether bottle or package seen:<br>Seen: Yes _____/No _____] | <input type="checkbox"/> <sub>1</sub> Yes<br><input type="checkbox"/> <sub>2</sub> No                                                                                                                             |
| (iii). Was this prescribed by:                                                                                                                      | <input type="checkbox"/> <sub>1</sub> Doctor<br><input type="checkbox"/> <sub>2</sub> Clinic nurse                                                                                                                |

|                                                                                                                                                     |                                                                                                                                                                                                                   |
|-----------------------------------------------------------------------------------------------------------------------------------------------------|-------------------------------------------------------------------------------------------------------------------------------------------------------------------------------------------------------------------|
|                                                                                                                                                     | <input type="checkbox"/> <sub>3</sub> None of the above<br><input type="checkbox"/> <sub>4</sub> Don't know                                                                                                       |
| (iv). Was this over the counter medication                                                                                                          | <input type="checkbox"/> <sub>1</sub> Yes<br><input type="checkbox"/> <sub>2</sub> No                                                                                                                             |
| (v). No. of days taken                                                                                                                              | _____ days                                                                                                                                                                                                        |
| <b>Musculoskeletal or Connective tissue</b>                                                                                                         |                                                                                                                                                                                                                   |
| 116. Have you ever been told by a doctor that you have Rheumatoid arthritis/                                                                        | <input type="checkbox"/> <sub>1</sub> Yes<br><input type="checkbox"/> <sub>2</sub> No <b>[If no, skip to Q117]</b>                                                                                                |
| (a). Were you told this more than six months before this pregnancy?                                                                                 | <input type="checkbox"/> <sub>1</sub> Yes<br><input type="checkbox"/> <sub>2</sub> No                                                                                                                             |
| (b). Were you told this in the last six months before this pregnancy?                                                                               | <input type="checkbox"/> <sub>1</sub> Yes<br><input type="checkbox"/> <sub>2</sub> No                                                                                                                             |
| (c). Were you told this during this pregnancy?                                                                                                      | <input type="checkbox"/> <sub>1</sub> Yes<br><input type="checkbox"/> <sub>2</sub> No                                                                                                                             |
| (i). If yes, in what week of the pregnancy?                                                                                                         | <input type="checkbox"/> <sub>1</sub> 0-4 weeks<br><input type="checkbox"/> <sub>2</sub> 5-8 weeks<br><input type="checkbox"/> <sub>3</sub> 9-12 weeks<br><input type="checkbox"/> <sub>4</sub> 13+ weeks         |
| (d). Have you taken any medication for this problem                                                                                                 | <input type="checkbox"/> <sub>1</sub> Yes<br><input type="checkbox"/> <sub>2</sub> No <b>[If no, skip to Q117]</b>                                                                                                |
| (i). Name of medication                                                                                                                             | _____                                                                                                                                                                                                             |
| (ii). Do you have the bottle or package that you could show?<br>[Interview to indicate whether bottle or package seen:<br>Seen: Yes _____/No _____] | <input type="checkbox"/> <sub>1</sub> Yes<br><input type="checkbox"/> <sub>2</sub> No                                                                                                                             |
| (iii). Was this prescribed by:                                                                                                                      | <input type="checkbox"/> <sub>1</sub> Doctor<br><input type="checkbox"/> <sub>2</sub> Clinic nurse<br><input type="checkbox"/> <sub>3</sub> None of the above<br><input type="checkbox"/> <sub>4</sub> Don't know |
| (iv). Was this over the counter medication                                                                                                          | <input type="checkbox"/> <sub>1</sub> Yes<br><input type="checkbox"/> <sub>2</sub> No                                                                                                                             |
| (v). No. of days taken                                                                                                                              | _____ days                                                                                                                                                                                                        |
|                                                                                                                                                     |                                                                                                                                                                                                                   |
| 117. Have you ever been told by a doctor that you have Lupus (SLE)/                                                                                 | <input type="checkbox"/> <sub>1</sub> Yes<br><input type="checkbox"/> <sub>2</sub> No <b>[If no, skip to Q118]</b>                                                                                                |
| (a). Were you told this more than six months before this pregnancy?                                                                                 | <input type="checkbox"/> <sub>1</sub> Yes<br><input type="checkbox"/> <sub>2</sub> No                                                                                                                             |
| (b). Were you told this in the last six months before this pregnancy?                                                                               | <input type="checkbox"/> <sub>1</sub> Yes<br><input type="checkbox"/> <sub>2</sub> No                                                                                                                             |
| (c). Were you told this during this pregnancy?                                                                                                      | <input type="checkbox"/> <sub>1</sub> Yes<br><input type="checkbox"/> <sub>2</sub> No                                                                                                                             |
| (i). If yes, in what week of the pregnancy?                                                                                                         | <input type="checkbox"/> <sub>1</sub> 0-4 weeks<br><input type="checkbox"/> <sub>2</sub> 5-8 weeks<br><input type="checkbox"/> <sub>3</sub> 9-12 weeks<br><input type="checkbox"/> <sub>4</sub> 13+ weeks         |
| (d). Have you taken any medication for this problem                                                                                                 | <input type="checkbox"/> <sub>1</sub> Yes<br><input type="checkbox"/> <sub>2</sub> No <b>[If no, skip to Q118]</b>                                                                                                |
| (i). Name of medication                                                                                                                             | _____                                                                                                                                                                                                             |
| (ii). Do you have the bottle or package that you could show?<br>[Interview to indicate whether bottle or package seen:<br>Seen: Yes _____/No _____] | <input type="checkbox"/> <sub>1</sub> Yes<br><input type="checkbox"/> <sub>2</sub> No                                                                                                                             |
| (iii). Was this prescribed by:                                                                                                                      | <input type="checkbox"/> <sub>1</sub> Doctor<br><input type="checkbox"/> <sub>2</sub> Clinic nurse                                                                                                                |

|                                                                                                                                                     |                                                                                                                                                                                                                   |
|-----------------------------------------------------------------------------------------------------------------------------------------------------|-------------------------------------------------------------------------------------------------------------------------------------------------------------------------------------------------------------------|
|                                                                                                                                                     | <input type="checkbox"/> <sub>3</sub> None of the above<br><input type="checkbox"/> <sub>4</sub> Don't know                                                                                                       |
| (iv). Was this over the counter medication                                                                                                          | <input type="checkbox"/> <sub>1</sub> Yes<br><input type="checkbox"/> <sub>2</sub> No                                                                                                                             |
| (v). No. of days taken                                                                                                                              | _____ days                                                                                                                                                                                                        |
| 118. Have you ever been told by a doctor that you have Sciatica                                                                                     | <input type="checkbox"/> <sub>1</sub> Yes<br><input type="checkbox"/> <sub>2</sub> No <b>[If no, skip to Q119]</b>                                                                                                |
| (a). Were you told this more than six months before this pregnancy?                                                                                 | <input type="checkbox"/> <sub>1</sub> Yes<br><input type="checkbox"/> <sub>2</sub> No                                                                                                                             |
| (b). Were you told this in the last six months before this pregnancy?                                                                               | <input type="checkbox"/> <sub>1</sub> Yes<br><input type="checkbox"/> <sub>2</sub> No                                                                                                                             |
| (c). Were you told this during this pregnancy?                                                                                                      | <input type="checkbox"/> <sub>1</sub> Yes<br><input type="checkbox"/> <sub>2</sub> No                                                                                                                             |
| (i). If yes, in what week of the pregnancy?                                                                                                         | <input type="checkbox"/> <sub>1</sub> 0-4 weeks<br><input type="checkbox"/> <sub>2</sub> 5-8 weeks<br><input type="checkbox"/> <sub>3</sub> 9-12 weeks<br><input type="checkbox"/> <sub>4</sub> 13+ weeks         |
| (d). Have you taken any medication for this problem                                                                                                 | <input type="checkbox"/> <sub>1</sub> Yes<br><input type="checkbox"/> <sub>2</sub> No <b>[If no, skip to Q119]</b>                                                                                                |
| (i). Name of medication                                                                                                                             | _____                                                                                                                                                                                                             |
| (ii). Do you have the bottle or package that you could show?<br>[Interview to indicate whether bottle or package seen:<br>Seen: Yes _____/No _____] | <input type="checkbox"/> <sub>1</sub> Yes<br><input type="checkbox"/> <sub>2</sub> No                                                                                                                             |
| (iii). Was this prescribed by:                                                                                                                      | <input type="checkbox"/> <sub>1</sub> Doctor<br><input type="checkbox"/> <sub>2</sub> Clinic nurse<br><input type="checkbox"/> <sub>3</sub> None of the above<br><input type="checkbox"/> <sub>4</sub> Don't know |
| (iv). Was this over the counter medication                                                                                                          | <input type="checkbox"/> <sub>1</sub> Yes<br><input type="checkbox"/> <sub>2</sub> No                                                                                                                             |
| (v). No. of days taken                                                                                                                              | _____ days                                                                                                                                                                                                        |
| 119. Have you ever been told by a doctor that you have myalgia                                                                                      | <input type="checkbox"/> <sub>1</sub> Yes<br><input type="checkbox"/> <sub>2</sub> No <b>[If no, skip to Q120]</b>                                                                                                |
| (a). Were you told this more than six months before this pregnancy?                                                                                 | <input type="checkbox"/> <sub>1</sub> Yes<br><input type="checkbox"/> <sub>2</sub> No                                                                                                                             |
| (b). Were you told this in the last six months before this pregnancy?                                                                               | <input type="checkbox"/> <sub>1</sub> Yes<br><input type="checkbox"/> <sub>2</sub> No                                                                                                                             |
| (c). Were you told this during this pregnancy?                                                                                                      | <input type="checkbox"/> <sub>1</sub> Yes<br><input type="checkbox"/> <sub>2</sub> No                                                                                                                             |
| (i). If yes, in what week of the pregnancy?                                                                                                         | <input type="checkbox"/> <sub>1</sub> 0-4 weeks<br><input type="checkbox"/> <sub>2</sub> 5-8 weeks<br><input type="checkbox"/> <sub>3</sub> 9-12 weeks<br><input type="checkbox"/> <sub>4</sub> 13+ weeks         |
| (d). Have you taken any medication for this problem                                                                                                 | <input type="checkbox"/> <sub>1</sub> Yes<br><input type="checkbox"/> <sub>2</sub> No <b>[If no, skip to Q120]</b>                                                                                                |
| (i). Name of medication                                                                                                                             | _____                                                                                                                                                                                                             |
| (ii). Do you have the bottle or package that you could show?<br>[Interview to indicate whether bottle or package seen:<br>Seen: Yes _____/No _____] | <input type="checkbox"/> <sub>1</sub> Yes<br><input type="checkbox"/> <sub>2</sub> No                                                                                                                             |
| (iii). Was this prescribed by:                                                                                                                      | <input type="checkbox"/> <sub>1</sub> Doctor<br><input type="checkbox"/> <sub>2</sub> Clinic nurse                                                                                                                |

|                                                                                                                                                     |                                                                                                                                                                                                                   |
|-----------------------------------------------------------------------------------------------------------------------------------------------------|-------------------------------------------------------------------------------------------------------------------------------------------------------------------------------------------------------------------|
|                                                                                                                                                     | <input type="checkbox"/> <sub>3</sub> None of the above<br><input type="checkbox"/> <sub>4</sub> Don't know                                                                                                       |
| (iv). Was this over the counter medication                                                                                                          | <input type="checkbox"/> <sub>1</sub> Yes<br><input type="checkbox"/> <sub>2</sub> No                                                                                                                             |
| (v). No. of days taken                                                                                                                              | _____ days                                                                                                                                                                                                        |
| <b>Genital and urinary tract</b>                                                                                                                    |                                                                                                                                                                                                                   |
| 120. Have you ever been told by a doctor that you have Ovary/fallopian tube infection                                                               | <input type="checkbox"/> <sub>1</sub> Yes<br><input type="checkbox"/> <sub>2</sub> No <b>[If no, skip to Q121]</b>                                                                                                |
| (a). Were you told this more than six months before this pregnancy?                                                                                 | <input type="checkbox"/> <sub>1</sub> Yes<br><input type="checkbox"/> <sub>2</sub> No                                                                                                                             |
| (b). Were you told this in the last six months before this pregnancy?                                                                               | <input type="checkbox"/> <sub>1</sub> Yes<br><input type="checkbox"/> <sub>2</sub> No                                                                                                                             |
| (c). Were you told this during this pregnancy?                                                                                                      | <input type="checkbox"/> <sub>1</sub> Yes<br><input type="checkbox"/> <sub>2</sub> No                                                                                                                             |
| (i). If yes, in what week of the pregnancy?                                                                                                         | <input type="checkbox"/> <sub>1</sub> 0-4 weeks<br><input type="checkbox"/> <sub>2</sub> 5-8 weeks<br><input type="checkbox"/> <sub>3</sub> 9-12 weeks<br><input type="checkbox"/> <sub>4</sub> 13+ weeks         |
| (d). Have you taken any medication for this problem                                                                                                 | <input type="checkbox"/> <sub>1</sub> Yes<br><input type="checkbox"/> <sub>2</sub> No <b>[If no, skip to Q121]</b>                                                                                                |
| (i). Name of medication                                                                                                                             | _____                                                                                                                                                                                                             |
| (ii). Do you have the bottle or package that you could show?<br>[Interview to indicate whether bottle or package seen:<br>Seen: Yes _____/No _____] | <input type="checkbox"/> <sub>1</sub> Yes<br><input type="checkbox"/> <sub>2</sub> No                                                                                                                             |
| (iii). Was this prescribed by:                                                                                                                      | <input type="checkbox"/> <sub>1</sub> Doctor<br><input type="checkbox"/> <sub>2</sub> Clinic nurse<br><input type="checkbox"/> <sub>3</sub> None of the above<br><input type="checkbox"/> <sub>4</sub> Don't know |
| (iv). Was this over the counter medication                                                                                                          | <input type="checkbox"/> <sub>1</sub> Yes<br><input type="checkbox"/> <sub>2</sub> No                                                                                                                             |
| (v). No. of days taken                                                                                                                              | _____ days                                                                                                                                                                                                        |
| <b>121. Have you ever been told by a doctor that you have Endometriosis</b>                                                                         |                                                                                                                                                                                                                   |
| (a). Were you told this more than six months before this pregnancy?                                                                                 | <input type="checkbox"/> <sub>1</sub> Yes<br><input type="checkbox"/> <sub>2</sub> No <b>[If no, skip to Q122]</b>                                                                                                |
| (b). Were you told this in the last six months before this pregnancy?                                                                               | <input type="checkbox"/> <sub>1</sub> Yes<br><input type="checkbox"/> <sub>2</sub> No                                                                                                                             |
| (c). Were you told this during this pregnancy?                                                                                                      | <input type="checkbox"/> <sub>1</sub> Yes<br><input type="checkbox"/> <sub>2</sub> No                                                                                                                             |
| (i). If yes, in what week of the pregnancy?                                                                                                         | <input type="checkbox"/> <sub>1</sub> 0-4 weeks<br><input type="checkbox"/> <sub>2</sub> 5-8 weeks<br><input type="checkbox"/> <sub>3</sub> 9-12 weeks<br><input type="checkbox"/> <sub>4</sub> 13+ weeks         |
| (d). Have you taken any medication for this problem                                                                                                 | <input type="checkbox"/> <sub>1</sub> Yes<br><input type="checkbox"/> <sub>2</sub> No <b>[If no, skip to Q122]</b>                                                                                                |
| (i). Name of medication                                                                                                                             | _____                                                                                                                                                                                                             |
| (ii). Do you have the bottle or package that you could show?<br>[Interview to indicate whether bottle or package seen:<br>Seen: Yes _____/No _____] | <input type="checkbox"/> <sub>1</sub> Yes<br><input type="checkbox"/> <sub>2</sub> No                                                                                                                             |
| (iii). Was this prescribed by:                                                                                                                      | <input type="checkbox"/> <sub>1</sub> Doctor<br><input type="checkbox"/> <sub>2</sub> Clinic nurse                                                                                                                |

|                                                                                                                                                     |                                                                                                                                                                                                                   |
|-----------------------------------------------------------------------------------------------------------------------------------------------------|-------------------------------------------------------------------------------------------------------------------------------------------------------------------------------------------------------------------|
|                                                                                                                                                     | <input type="checkbox"/> <sub>3</sub> None of the above<br><input type="checkbox"/> <sub>4</sub> Don't know                                                                                                       |
| (iv). Was this over the counter medication                                                                                                          | <input type="checkbox"/> <sub>1</sub> Yes<br><input type="checkbox"/> <sub>2</sub> No                                                                                                                             |
| (v). No. of days taken                                                                                                                              | _____ days                                                                                                                                                                                                        |
| 122. Have you ever been told by a doctor that you have Ovarian cyst/                                                                                | <input type="checkbox"/> <sub>1</sub> Yes<br><input type="checkbox"/> <sub>2</sub> No <b>[If no, skip to Q123]</b>                                                                                                |
| (a). Were you told this more than six months before this pregnancy?                                                                                 | <input type="checkbox"/> <sub>1</sub> Yes<br><input type="checkbox"/> <sub>2</sub> No                                                                                                                             |
| (b). Were you told this in the last six months before this pregnancy?                                                                               | <input type="checkbox"/> <sub>1</sub> Yes<br><input type="checkbox"/> <sub>2</sub> No                                                                                                                             |
| (c). Were you told this during this pregnancy?                                                                                                      | <input type="checkbox"/> <sub>1</sub> Yes<br><input type="checkbox"/> <sub>2</sub> No                                                                                                                             |
| (i). If yes, in what week of the pregnancy?                                                                                                         | <input type="checkbox"/> <sub>1</sub> 0-4 weeks<br><input type="checkbox"/> <sub>2</sub> 5-8 weeks<br><input type="checkbox"/> <sub>3</sub> 9-12 weeks<br><input type="checkbox"/> <sub>4</sub> 13+ weeks         |
| (d). Have you taken any medication for this problem                                                                                                 | <input type="checkbox"/> <sub>1</sub> Yes<br><input type="checkbox"/> <sub>2</sub> No <b>[If no, skip to Q123]</b>                                                                                                |
| (i). Name of medication                                                                                                                             | _____                                                                                                                                                                                                             |
| (ii). Do you have the bottle or package that you could show?<br>[Interview to indicate whether bottle or package seen:<br>Seen: Yes _____/No _____] | <input type="checkbox"/> <sub>1</sub> Yes<br><input type="checkbox"/> <sub>2</sub> No                                                                                                                             |
| (iii). Was this prescribed by:                                                                                                                      | <input type="checkbox"/> <sub>1</sub> Doctor<br><input type="checkbox"/> <sub>2</sub> Clinic nurse<br><input type="checkbox"/> <sub>3</sub> None of the above<br><input type="checkbox"/> <sub>4</sub> Don't know |
| (iv). Was this over the counter medication                                                                                                          | <input type="checkbox"/> <sub>1</sub> Yes<br><input type="checkbox"/> <sub>2</sub> No                                                                                                                             |
| (v). No. of days taken                                                                                                                              | _____ days                                                                                                                                                                                                        |
| 123. Have you ever been told by a doctor that you have any cervical disease                                                                         | <input type="checkbox"/> <sub>1</sub> Yes<br><input type="checkbox"/> <sub>2</sub> No <b>[If no, skip to Q124]</b>                                                                                                |
| (a). Were you told this more than six months before this pregnancy?                                                                                 | <input type="checkbox"/> <sub>1</sub> Yes<br><input type="checkbox"/> <sub>2</sub> No                                                                                                                             |
| (b). Were you told this in the last six months before this pregnancy?                                                                               | <input type="checkbox"/> <sub>1</sub> Yes<br><input type="checkbox"/> <sub>2</sub> No                                                                                                                             |
| (c). Were you told this during this pregnancy?                                                                                                      | <input type="checkbox"/> <sub>1</sub> Yes<br><input type="checkbox"/> <sub>2</sub> No                                                                                                                             |
| (i). If yes, in what week of the pregnancy?                                                                                                         | <input type="checkbox"/> <sub>1</sub> 0-4 weeks<br><input type="checkbox"/> <sub>2</sub> 5-8 weeks<br><input type="checkbox"/> <sub>3</sub> 9-12 weeks<br><input type="checkbox"/> <sub>4</sub> 13+ weeks         |
| (d). Have you taken any medication for this problem                                                                                                 | <input type="checkbox"/> <sub>1</sub> Yes<br><input type="checkbox"/> <sub>2</sub> No <b>[If no, skip to Q124]</b>                                                                                                |
| (i). Name of medication                                                                                                                             | _____                                                                                                                                                                                                             |
| (ii). Do you have the bottle or package that you could show?<br>[Interview to indicate whether bottle or package seen:<br>Seen: Yes _____/No _____] | <input type="checkbox"/> <sub>1</sub> Yes<br><input type="checkbox"/> <sub>2</sub> No                                                                                                                             |
| (iii). Was this prescribed by:                                                                                                                      | <input type="checkbox"/> <sub>1</sub> Doctor<br><input type="checkbox"/> <sub>2</sub> Clinic nurse                                                                                                                |

|                                                                                                                                                     |                                                                                                                                                                                                                                                                                                                                                                                             |
|-----------------------------------------------------------------------------------------------------------------------------------------------------|---------------------------------------------------------------------------------------------------------------------------------------------------------------------------------------------------------------------------------------------------------------------------------------------------------------------------------------------------------------------------------------------|
|                                                                                                                                                     | <input type="checkbox"/> <sub>3</sub> None of the above<br><input type="checkbox"/> <sub>4</sub> Don't know                                                                                                                                                                                                                                                                                 |
| (iv). Was this over the counter medication                                                                                                          | <input type="checkbox"/> <sub>1</sub> Yes<br><input type="checkbox"/> <sub>2</sub> No                                                                                                                                                                                                                                                                                                       |
| (v). No. of days taken                                                                                                                              | _____ days                                                                                                                                                                                                                                                                                                                                                                                  |
| 124. Have you ever been told by a doctor that you have sexually transmitted infections?                                                             | <input type="checkbox"/> <sub>1</sub> Yes<br><input type="checkbox"/> <sub>2</sub> No <b>[If no, skip to Q125]</b>                                                                                                                                                                                                                                                                          |
| (a). Were you told this more than six months before this pregnancy?                                                                                 | <input type="checkbox"/> <sub>1</sub> Yes<br><input type="checkbox"/> <sub>2</sub> No                                                                                                                                                                                                                                                                                                       |
| (b). Were you told this in the last six months before this pregnancy?                                                                               | <input type="checkbox"/> <sub>1</sub> Yes<br><input type="checkbox"/> <sub>2</sub> No                                                                                                                                                                                                                                                                                                       |
| (c). Were you told this during this pregnancy?                                                                                                      | <input type="checkbox"/> <sub>1</sub> Yes<br><input type="checkbox"/> <sub>2</sub> No                                                                                                                                                                                                                                                                                                       |
| (i). If yes, in what week of the pregnancy?                                                                                                         | <input type="checkbox"/> <sub>1</sub> 0-4 weeks<br><input type="checkbox"/> <sub>2</sub> 5-8 weeks<br><input type="checkbox"/> <sub>3</sub> 9-12 weeks<br><input type="checkbox"/> <sub>4</sub> 13+ weeks                                                                                                                                                                                   |
| (d). Have you taken any medication for this problem                                                                                                 | <input type="checkbox"/> <sub>1</sub> Yes<br><input type="checkbox"/> <sub>2</sub> No <b>[If no, skip to Q125]</b>                                                                                                                                                                                                                                                                          |
| (i). Name of medication                                                                                                                             | _____                                                                                                                                                                                                                                                                                                                                                                                       |
| (ii). Do you have the bottle or package that you could show?<br>[Interview to indicate whether bottle or package seen:<br>Seen: Yes _____/No _____] | <input type="checkbox"/> <sub>1</sub> Yes<br><input type="checkbox"/> <sub>2</sub> No                                                                                                                                                                                                                                                                                                       |
| (iii). Was this prescribed by:                                                                                                                      | <input type="checkbox"/> <sub>1</sub> Doctor<br><input type="checkbox"/> <sub>2</sub> Clinic nurse<br><input type="checkbox"/> <sub>3</sub> None of the above<br><input type="checkbox"/> <sub>4</sub> Don't know                                                                                                                                                                           |
| (iv). Was this over the counter medication                                                                                                          | <input type="checkbox"/> <sub>1</sub> Yes<br><input type="checkbox"/> <sub>2</sub> No                                                                                                                                                                                                                                                                                                       |
| (v). No. of days taken                                                                                                                              | _____ days                                                                                                                                                                                                                                                                                                                                                                                  |
| (e). What was this disease?                                                                                                                         | <input type="checkbox"/> <sub>1</sub> herpes<br><input type="checkbox"/> <sub>2</sub> chlamydia<br><input type="checkbox"/> <sub>3</sub> gonorrhoea<br><input type="checkbox"/> <sub>4</sub> syphillis<br><input type="checkbox"/> <sub>5</sub> venereal warts<br><input type="checkbox"/> <sub>88</sub> other, please describe: _____<br><input type="checkbox"/> <sub>99</sub> don't know |
| 125. Have you ever been told by a doctor that you have kidney stones                                                                                | <input type="checkbox"/> <sub>1</sub> Yes<br><input type="checkbox"/> <sub>2</sub> No <b>[If no, skip to Q126]</b>                                                                                                                                                                                                                                                                          |
| (a). Were you told this more than six months before this pregnancy?                                                                                 | <input type="checkbox"/> <sub>1</sub> Yes<br><input type="checkbox"/> <sub>2</sub> No                                                                                                                                                                                                                                                                                                       |
| (b). Were you told this in the last six months before this pregnancy?                                                                               | <input type="checkbox"/> <sub>1</sub> Yes<br><input type="checkbox"/> <sub>2</sub> No                                                                                                                                                                                                                                                                                                       |
| (c). Were you told this during this pregnancy?                                                                                                      | <input type="checkbox"/> <sub>1</sub> Yes<br><input type="checkbox"/> <sub>2</sub> No                                                                                                                                                                                                                                                                                                       |
| (i). If yes, in what week of the pregnancy?                                                                                                         | <input type="checkbox"/> <sub>1</sub> 0-4 weeks<br><input type="checkbox"/> <sub>2</sub> 5-8 weeks<br><input type="checkbox"/> <sub>3</sub> 9-12 weeks<br><input type="checkbox"/> <sub>4</sub> 13+ weeks                                                                                                                                                                                   |
| (d). Have you taken any medication for this problem                                                                                                 | <input type="checkbox"/> <sub>1</sub> Yes<br><input type="checkbox"/> <sub>2</sub> No <b>[If no, skip to Q126]</b>                                                                                                                                                                                                                                                                          |
| (i). Name of medication                                                                                                                             | _____                                                                                                                                                                                                                                                                                                                                                                                       |



|                                                                                                                                                     |                                                                                                                                                                                                                   |
|-----------------------------------------------------------------------------------------------------------------------------------------------------|-------------------------------------------------------------------------------------------------------------------------------------------------------------------------------------------------------------------|
| (ii). Do you have the bottle or package that you could show?<br>[Interview to indicate whether bottle or package seen:<br>Seen: Yes _____/No _____] | <input type="checkbox"/> <sub>1</sub> Yes<br><input type="checkbox"/> <sub>2</sub> No                                                                                                                             |
| (iii). Was this prescribed by:                                                                                                                      | <input type="checkbox"/> <sub>1</sub> Doctor<br><input type="checkbox"/> <sub>2</sub> Clinic nurse<br><input type="checkbox"/> <sub>3</sub> None of the above<br><input type="checkbox"/> <sub>4</sub> Don't know |
| (iv). Was this over the counter medication                                                                                                          | <input type="checkbox"/> <sub>1</sub> Yes<br><input type="checkbox"/> <sub>2</sub> No                                                                                                                             |
| (v). No. of days taken                                                                                                                              | _____ days                                                                                                                                                                                                        |
| 126. Have you ever been told by a doctor that you have kidney infection                                                                             | <input type="checkbox"/> <sub>1</sub> Yes<br><input type="checkbox"/> <sub>2</sub> No <b>[If no, skip to Q127]</b>                                                                                                |
| (a). Were you told this more than six months before this pregnancy?                                                                                 | <input type="checkbox"/> <sub>1</sub> Yes<br><input type="checkbox"/> <sub>2</sub> No                                                                                                                             |
| (b). Were you told this in the last six months before this pregnancy?                                                                               | <input type="checkbox"/> <sub>1</sub> Yes<br><input type="checkbox"/> <sub>2</sub> No                                                                                                                             |
| (c). Were you told this during this pregnancy?                                                                                                      | <input type="checkbox"/> <sub>1</sub> Yes<br><input type="checkbox"/> <sub>2</sub> No                                                                                                                             |
| (i). If yes, in what week of the pregnancy?                                                                                                         | <input type="checkbox"/> <sub>1</sub> 0-4 weeks<br><input type="checkbox"/> <sub>2</sub> 5-8 weeks<br><input type="checkbox"/> <sub>3</sub> 9-12 weeks<br><input type="checkbox"/> <sub>4</sub> 13+ weeks         |
| (d). Have you taken any medication for this problem                                                                                                 | <input type="checkbox"/> <sub>1</sub> Yes<br><input type="checkbox"/> <sub>2</sub> No <b>[If no, skip to Q127]</b>                                                                                                |
| (i). Name of medication                                                                                                                             | _____                                                                                                                                                                                                             |
| (ii). Do you have the bottle or package that you could show?<br>[Interview to indicate whether bottle or package seen:<br>Seen: Yes _____/No _____] | <input type="checkbox"/> <sub>1</sub> Yes<br><input type="checkbox"/> <sub>2</sub> No                                                                                                                             |
| (iii). Was this prescribed by:                                                                                                                      | <input type="checkbox"/> <sub>1</sub> Doctor<br><input type="checkbox"/> <sub>2</sub> Clinic nurse<br><input type="checkbox"/> <sub>3</sub> None of the above<br><input type="checkbox"/> <sub>4</sub> Don't know |
| (iv). Was this over the counter medication                                                                                                          | <input type="checkbox"/> <sub>1</sub> Yes<br><input type="checkbox"/> <sub>2</sub> No                                                                                                                             |
| (v). No. of days taken                                                                                                                              | _____ days                                                                                                                                                                                                        |
| 127. Have you ever been told by a doctor that you have urinary tract infection?                                                                     | <input type="checkbox"/> <sub>1</sub> Yes<br><input type="checkbox"/> <sub>2</sub> No <b>[If no, skip to Q128]</b>                                                                                                |
| (a). Were you told this more than six months before this pregnancy?                                                                                 | <input type="checkbox"/> <sub>1</sub> Yes<br><input type="checkbox"/> <sub>2</sub> No                                                                                                                             |
| (b). Were you told this in the last six months before this pregnancy?                                                                               | <input type="checkbox"/> <sub>1</sub> Yes<br><input type="checkbox"/> <sub>2</sub> No                                                                                                                             |
| (c). Were you told this during this pregnancy?                                                                                                      | <input type="checkbox"/> <sub>1</sub> Yes<br><input type="checkbox"/> <sub>2</sub> No                                                                                                                             |
| (i). If yes, in what week of the pregnancy?                                                                                                         | <input type="checkbox"/> <sub>1</sub> 0-4 weeks<br><input type="checkbox"/> <sub>2</sub> 5-8 weeks<br><input type="checkbox"/> <sub>3</sub> 9-12 weeks<br><input type="checkbox"/> <sub>4</sub> 13+ weeks         |
| (d). Have you taken any medication for this problem                                                                                                 | <input type="checkbox"/> <sub>1</sub> Yes<br><input type="checkbox"/> <sub>2</sub> No <b>[If no, skip to Q128]</b>                                                                                                |
| (i). Name of medication                                                                                                                             | _____                                                                                                                                                                                                             |

|                                                                                                                                                     |                                                                                                                                                                                                                   |
|-----------------------------------------------------------------------------------------------------------------------------------------------------|-------------------------------------------------------------------------------------------------------------------------------------------------------------------------------------------------------------------|
| (ii). Do you have the bottle or package that you could show?<br>[Interview to indicate whether bottle or package seen:<br>Seen: Yes _____/No _____] | <input type="checkbox"/> <sub>1</sub> Yes<br><input type="checkbox"/> <sub>2</sub> No                                                                                                                             |
| (iii). Was this prescribed by:                                                                                                                      | <input type="checkbox"/> <sub>1</sub> Doctor<br><input type="checkbox"/> <sub>2</sub> Clinic nurse<br><input type="checkbox"/> <sub>3</sub> None of the above<br><input type="checkbox"/> <sub>4</sub> Don't know |
| (iv). Was this over the counter medication                                                                                                          | <input type="checkbox"/> <sub>1</sub> Yes<br><input type="checkbox"/> <sub>2</sub> No                                                                                                                             |
| (v). No. of days taken                                                                                                                              | _____ days                                                                                                                                                                                                        |
| 128. Have you ever been told by a doctor that you have incontinence?                                                                                | <input type="checkbox"/> <sub>1</sub> Yes<br><input type="checkbox"/> <sub>2</sub> No [If no, skip to Q129]                                                                                                       |
| (a). Were you told this more than six months before this pregnancy?                                                                                 | <input type="checkbox"/> <sub>1</sub> Yes<br><input type="checkbox"/> <sub>2</sub> No                                                                                                                             |
| (b). Were you told this in the last six months before this pregnancy?                                                                               | <input type="checkbox"/> <sub>1</sub> Yes<br><input type="checkbox"/> <sub>2</sub> No                                                                                                                             |
| (c). Were you told this during this pregnancy?                                                                                                      | <input type="checkbox"/> <sub>1</sub> Yes<br><input type="checkbox"/> <sub>2</sub> No                                                                                                                             |
| (i). If yes, in what week of the pregnancy?                                                                                                         | <input type="checkbox"/> <sub>1</sub> 0-4 weeks<br><input type="checkbox"/> <sub>2</sub> 5-8 weeks<br><input type="checkbox"/> <sub>3</sub> 9-12 weeks<br><input type="checkbox"/> <sub>4</sub> 13+ weeks         |
| (d). Have you taken any medication for this problem                                                                                                 | <input type="checkbox"/> <sub>1</sub> Yes<br><input type="checkbox"/> <sub>2</sub> No [If no, skip to Q129]                                                                                                       |
| (i). Name of medication                                                                                                                             | _____                                                                                                                                                                                                             |
| (ii). Do you have the bottle or package that you could show?<br>[Interview to indicate whether bottle or package seen:<br>Seen: Yes _____/No _____] | <input type="checkbox"/> <sub>1</sub> Yes<br><input type="checkbox"/> <sub>2</sub> No                                                                                                                             |
| (iii). Was this prescribed by:                                                                                                                      | <input type="checkbox"/> <sub>1</sub> Doctor<br><input type="checkbox"/> <sub>2</sub> Clinic nurse<br><input type="checkbox"/> <sub>3</sub> None of the above<br><input type="checkbox"/> <sub>4</sub> Don't know |
| (iv). Was this over the counter medication                                                                                                          | <input type="checkbox"/> <sub>1</sub> Yes<br><input type="checkbox"/> <sub>2</sub> No                                                                                                                             |
| (v). No. of days taken                                                                                                                              | _____ days                                                                                                                                                                                                        |
| <b>Other illnesses/health problems</b>                                                                                                              |                                                                                                                                                                                                                   |
| 129. Have you ever been told by a doctor that you have anorexia, bulimia or other eating disorders                                                  | <input type="checkbox"/> <sub>1</sub> Yes<br><input type="checkbox"/> <sub>2</sub> No [If no, skip to Q130]                                                                                                       |
| (a). Were you told this more than six months before this pregnancy?                                                                                 | <input type="checkbox"/> <sub>1</sub> Yes<br><input type="checkbox"/> <sub>2</sub> No                                                                                                                             |
| (b). Were you told this in the last six months before this pregnancy?                                                                               | <input type="checkbox"/> <sub>1</sub> Yes<br><input type="checkbox"/> <sub>2</sub> No                                                                                                                             |
| (c). Were you told this during this pregnancy?                                                                                                      | <input type="checkbox"/> <sub>1</sub> Yes<br><input type="checkbox"/> <sub>2</sub> No                                                                                                                             |
| (i). If yes, in what week of the pregnancy?                                                                                                         | <input type="checkbox"/> <sub>1</sub> 0-4 weeks<br><input type="checkbox"/> <sub>2</sub> 5-8 weeks<br><input type="checkbox"/> <sub>3</sub> 9-12 weeks<br><input type="checkbox"/> <sub>4</sub> 13+ weeks         |
| (d). Have you taken any medication for this problem                                                                                                 | <input type="checkbox"/> <sub>1</sub> Yes<br><input type="checkbox"/> <sub>2</sub> No [If no, skip to Q130]                                                                                                       |
| (i). Name of medication                                                                                                                             | _____                                                                                                                                                                                                             |

|                                                                                                                                                     |                                                                                                                                                                                                                   |
|-----------------------------------------------------------------------------------------------------------------------------------------------------|-------------------------------------------------------------------------------------------------------------------------------------------------------------------------------------------------------------------|
| (ii). Do you have the bottle or package that you could show?<br>[Interview to indicate whether bottle or package seen:<br>Seen: Yes _____/No _____] | <input type="checkbox"/> <sub>1</sub> Yes<br><input type="checkbox"/> <sub>2</sub> No                                                                                                                             |
| (iii). Was this prescribed by:                                                                                                                      | <input type="checkbox"/> <sub>1</sub> Doctor<br><input type="checkbox"/> <sub>2</sub> Clinic nurse<br><input type="checkbox"/> <sub>3</sub> None of the above<br><input type="checkbox"/> <sub>4</sub> Don't know |
| (iv). Was this over the counter medication                                                                                                          | <input type="checkbox"/> <sub>1</sub> Yes<br><input type="checkbox"/> <sub>2</sub> No                                                                                                                             |
| (v). No. of days taken                                                                                                                              | _____ days                                                                                                                                                                                                        |
| 130. Have you ever been told by a doctor that you have Migraine                                                                                     | <input type="checkbox"/> <sub>1</sub> Yes<br><input type="checkbox"/> <sub>2</sub> No <b>[If no, skip to Q131]</b>                                                                                                |
| (a). Were you told this more than six months before this pregnancy?                                                                                 | <input type="checkbox"/> <sub>1</sub> Yes<br><input type="checkbox"/> <sub>2</sub> No                                                                                                                             |
| (b). Were you told this in the last six months before this pregnancy?                                                                               | <input type="checkbox"/> <sub>1</sub> Yes<br><input type="checkbox"/> <sub>2</sub> No                                                                                                                             |
| (c). Were you told this during this pregnancy?                                                                                                      | <input type="checkbox"/> <sub>1</sub> Yes<br><input type="checkbox"/> <sub>2</sub> No                                                                                                                             |
| (i). If yes, in what week of the pregnancy?                                                                                                         | <input type="checkbox"/> <sub>1</sub> 0-4 weeks<br><input type="checkbox"/> <sub>2</sub> 5-8 weeks<br><input type="checkbox"/> <sub>3</sub> 9-12 weeks<br><input type="checkbox"/> <sub>4</sub> 13+ weeks         |
| (d). Have you taken any medication for this problem                                                                                                 | <input type="checkbox"/> <sub>1</sub> Yes<br><input type="checkbox"/> <sub>2</sub> No <b>[If no, skip to Q131]</b>                                                                                                |
| (i). Name of medication                                                                                                                             | _____                                                                                                                                                                                                             |
| (ii). Do you have the bottle or package that you could show?<br>[Interview to indicate whether bottle or package seen:<br>Seen: Yes _____/No _____] | <input type="checkbox"/> <sub>1</sub> Yes<br><input type="checkbox"/> <sub>2</sub> No                                                                                                                             |
| (iii). Was this prescribed by:                                                                                                                      | <input type="checkbox"/> <sub>1</sub> Doctor<br><input type="checkbox"/> <sub>2</sub> Clinic nurse<br><input type="checkbox"/> <sub>3</sub> None of the above<br><input type="checkbox"/> <sub>4</sub> Don't know |
| (iv). Was this over the counter medication                                                                                                          | <input type="checkbox"/> <sub>1</sub> Yes<br><input type="checkbox"/> <sub>2</sub> No                                                                                                                             |
| (v). No. of days taken                                                                                                                              | _____ days                                                                                                                                                                                                        |
| 131. Have you ever been told by a doctor that you have Epilepsy                                                                                     | <input type="checkbox"/> <sub>1</sub> Yes<br><input type="checkbox"/> <sub>2</sub> No <b>[If no, skip to Q132]</b>                                                                                                |
| (a). Were you told this more than six months before this pregnancy?                                                                                 | <input type="checkbox"/> <sub>1</sub> Yes<br><input type="checkbox"/> <sub>2</sub> No                                                                                                                             |
| (b). Were you told this in the last six months before this pregnancy?                                                                               | <input type="checkbox"/> <sub>1</sub> Yes<br><input type="checkbox"/> <sub>2</sub> No                                                                                                                             |
| (c). Were you told this during this pregnancy?                                                                                                      | <input type="checkbox"/> <sub>1</sub> Yes<br><input type="checkbox"/> <sub>2</sub> No                                                                                                                             |
| (i). If yes, in what week of the pregnancy?                                                                                                         | <input type="checkbox"/> <sub>1</sub> 0-4 weeks<br><input type="checkbox"/> <sub>2</sub> 5-8 weeks<br><input type="checkbox"/> <sub>3</sub> 9-12 weeks<br><input type="checkbox"/> <sub>4</sub> 13+ weeks         |
| (d). Have you taken any medication for this problem                                                                                                 | <input type="checkbox"/> <sub>1</sub> Yes<br><input type="checkbox"/> <sub>2</sub> No <b>[If no, skip to Q132]</b>                                                                                                |
| (i). Name of medication                                                                                                                             | _____                                                                                                                                                                                                             |

|                                                                                                                                                     |                                                                                                                                                                                                                   |
|-----------------------------------------------------------------------------------------------------------------------------------------------------|-------------------------------------------------------------------------------------------------------------------------------------------------------------------------------------------------------------------|
| (ii). Do you have the bottle or package that you could show?<br>[Interview to indicate whether bottle or package seen:<br>Seen: Yes _____/No _____] | <input type="checkbox"/> <sub>1</sub> Yes<br><input type="checkbox"/> <sub>2</sub> No                                                                                                                             |
| (iii). Was this prescribed by:                                                                                                                      | <input type="checkbox"/> <sub>1</sub> Doctor<br><input type="checkbox"/> <sub>2</sub> Clinic nurse<br><input type="checkbox"/> <sub>3</sub> None of the above<br><input type="checkbox"/> <sub>4</sub> Don't know |
| (iv). Was this over the counter medication                                                                                                          | <input type="checkbox"/> <sub>1</sub> Yes<br><input type="checkbox"/> <sub>2</sub> No                                                                                                                             |
| (v). No. of days taken                                                                                                                              | _____ days                                                                                                                                                                                                        |
| 132. Have you ever been told by a doctor that you have Cancer                                                                                       | <input type="checkbox"/> <sub>1</sub> Yes<br><input type="checkbox"/> <sub>2</sub> No <b>[If no, skip to Q133]</b>                                                                                                |
| (a). Were you told this more than six months before this pregnancy?                                                                                 | <input type="checkbox"/> <sub>1</sub> Yes<br><input type="checkbox"/> <sub>2</sub> No                                                                                                                             |
| (b). Were you told this in the last six months before this pregnancy?                                                                               | <input type="checkbox"/> <sub>1</sub> Yes<br><input type="checkbox"/> <sub>2</sub> No                                                                                                                             |
| (c). Were you told this during this pregnancy?                                                                                                      | <input type="checkbox"/> <sub>1</sub> Yes<br><input type="checkbox"/> <sub>2</sub> No                                                                                                                             |
| (i). If yes, in what week of the pregnancy?                                                                                                         | <input type="checkbox"/> <sub>1</sub> 0-4 weeks<br><input type="checkbox"/> <sub>2</sub> 5-8 weeks<br><input type="checkbox"/> <sub>3</sub> 9-12 weeks<br><input type="checkbox"/> <sub>4</sub> 13+ weeks         |
| (d). Have you taken any medication for this problem                                                                                                 | <input type="checkbox"/> <sub>1</sub> Yes<br><input type="checkbox"/> <sub>2</sub> No <b>[If no, skip to Q133]</b>                                                                                                |
| (i). Name of medication                                                                                                                             | _____                                                                                                                                                                                                             |
| (ii). Do you have the bottle or package that you could show?<br>[Interview to indicate whether bottle or package seen:<br>Seen: Yes _____/No _____] | <input type="checkbox"/> <sub>1</sub> Yes<br><input type="checkbox"/> <sub>2</sub> No                                                                                                                             |
| (iii). Was this prescribed by:                                                                                                                      | <input type="checkbox"/> <sub>1</sub> Doctor<br><input type="checkbox"/> <sub>2</sub> Clinic nurse<br><input type="checkbox"/> <sub>3</sub> None of the above<br><input type="checkbox"/> <sub>4</sub> Don't know |
| (iv). Was this over the counter medication                                                                                                          | <input type="checkbox"/> <sub>1</sub> Yes<br><input type="checkbox"/> <sub>2</sub> No                                                                                                                             |
| (v). No. of days taken                                                                                                                              | _____ days                                                                                                                                                                                                        |
| 133. Have you ever been told by a doctor that you have Depression or Anxiety                                                                        | <input type="checkbox"/> <sub>1</sub> Yes<br><input type="checkbox"/> <sub>2</sub> No <b>[If no, skip to Q134]</b>                                                                                                |
| (a). Were you told this more than six months before this pregnancy?                                                                                 | <input type="checkbox"/> <sub>1</sub> Yes<br><input type="checkbox"/> <sub>2</sub> No                                                                                                                             |
| (b). Were you told this in the last six months before this pregnancy?                                                                               | <input type="checkbox"/> <sub>1</sub> Yes<br><input type="checkbox"/> <sub>2</sub> No                                                                                                                             |
| (c). Were you told this during this pregnancy?                                                                                                      | <input type="checkbox"/> <sub>1</sub> Yes<br><input type="checkbox"/> <sub>2</sub> No                                                                                                                             |
| (i). If yes, in what week of the pregnancy?                                                                                                         | <input type="checkbox"/> <sub>1</sub> 0-4 weeks<br><input type="checkbox"/> <sub>2</sub> 5-8 weeks<br><input type="checkbox"/> <sub>3</sub> 9-12 weeks<br><input type="checkbox"/> <sub>4</sub> 13+ weeks         |
| (d). Have you taken any medication for this problem                                                                                                 | <input type="checkbox"/> <sub>1</sub> Yes<br><input type="checkbox"/> <sub>2</sub> No <b>[If no, skip to Q134]</b>                                                                                                |
| (i). Name of medication                                                                                                                             | _____                                                                                                                                                                                                             |

|                                                                                                                                                     |                                                                                                                                                                                                                                   |
|-----------------------------------------------------------------------------------------------------------------------------------------------------|-----------------------------------------------------------------------------------------------------------------------------------------------------------------------------------------------------------------------------------|
| (ii). Do you have the bottle or package that you could show?<br>[Interview to indicate whether bottle or package seen:<br>Seen: Yes _____/No _____] | <input type="checkbox"/> <sub>1</sub> Yes<br><input type="checkbox"/> <sub>2</sub> No                                                                                                                                             |
| (iii). Was this prescribed by:                                                                                                                      | <input type="checkbox"/> <sub>1</sub> Doctor<br><input type="checkbox"/> <sub>2</sub> Clinic nurse<br><input type="checkbox"/> <sub>3</sub> None of the above<br><input type="checkbox"/> <sub>4</sub> Don't know                 |
| (iv). Was this over the counter medication                                                                                                          | <input type="checkbox"/> <sub>1</sub> Yes<br><input type="checkbox"/> <sub>2</sub> No                                                                                                                                             |
| (v). No. of days taken                                                                                                                              | _____ days                                                                                                                                                                                                                        |
| 134. Have you ever been told by a doctor that you have any other long illnesses or health problems                                                  | <input type="checkbox"/> <sub>1</sub> Yes<br><input type="checkbox"/> <sub>2</sub> No <b>[If no, skip to Q135]</b>                                                                                                                |
| If so, please describe                                                                                                                              | _____                                                                                                                                                                                                                             |
| (a). Were you told this more than six months before this pregnancy?                                                                                 | <input type="checkbox"/> <sub>1</sub> Yes<br><input type="checkbox"/> <sub>2</sub> No                                                                                                                                             |
| (b). Were you told this in the last six months before this pregnancy?                                                                               | <input type="checkbox"/> <sub>1</sub> Yes<br><input type="checkbox"/> <sub>2</sub> No                                                                                                                                             |
| (c). Were you told this during this pregnancy?                                                                                                      | <input type="checkbox"/> <sub>1</sub> Yes<br><input type="checkbox"/> <sub>2</sub> No                                                                                                                                             |
| (i). If yes, in what week of the pregnancy?                                                                                                         | <input type="checkbox"/> <sub>1</sub> 0-4 weeks<br><input type="checkbox"/> <sub>2</sub> 5-8 weeks<br><input type="checkbox"/> <sub>3</sub> 9-12 weeks<br><input type="checkbox"/> <sub>4</sub> 13+ weeks                         |
| (d). Have you taken any medication for this problem                                                                                                 | <input type="checkbox"/> <sub>1</sub> Yes<br><input type="checkbox"/> <sub>2</sub> No <b>[If no, skip to Q135]</b>                                                                                                                |
| (i). Name of medication                                                                                                                             | _____                                                                                                                                                                                                                             |
| (ii). Do you have the bottle or package that you could show?<br>[Interview to indicate whether bottle or package seen:<br>Seen: Yes _____/No _____] | <input type="checkbox"/> <sub>1</sub> Yes<br><input type="checkbox"/> <sub>2</sub> No                                                                                                                                             |
| (iii). Was this prescribed by:                                                                                                                      | <input type="checkbox"/> <sub>1</sub> Doctor<br><input type="checkbox"/> <sub>2</sub> Clinic nurse<br><input type="checkbox"/> <sub>3</sub> None of the above<br><input type="checkbox"/> <sub>4</sub> Don't know                 |
| (iv). Was this over the counter medication                                                                                                          | <input type="checkbox"/> <sub>1</sub> Yes<br><input type="checkbox"/> <sub>2</sub> No                                                                                                                                             |
| (v). No. of days taken                                                                                                                              | _____ days                                                                                                                                                                                                                        |
| <b>Other diseases</b>                                                                                                                               |                                                                                                                                                                                                                                   |
| 135. Do you have a congenital deformity or birth defect?                                                                                            | <input type="checkbox"/> <sub>1</sub> Yes<br><input type="checkbox"/> <sub>2</sub> No                                                                                                                                             |
| 136. If yes, please describe?                                                                                                                       | _____                                                                                                                                                                                                                             |
| 137. Do your gums bleed when you brush your teeth at present?                                                                                       | <input type="checkbox"/> <sub>1</sub> No, rarely or never<br><input type="checkbox"/> <sub>2</sub> Yes, sometimes<br><input type="checkbox"/> <sub>3</sub> Yes, often<br><input type="checkbox"/> <sub>4</sub> Yes, almost always |
| <b>H. OTHER MEDICATION</b>                                                                                                                          |                                                                                                                                                                                                                                   |
| 138. Have you used other medication not previously mentioned?                                                                                       | <input type="checkbox"/> <sub>1</sub> Yes<br><input type="checkbox"/> <sub>2</sub> No <b>[If no, skip to Q145]</b>                                                                                                                |
| 139. If yes, please state these medication                                                                                                          | Medication 1:<br>_____                                                                                                                                                                                                            |

|                                                                                                                                                                     |                                                                                                                                                                                                                   |
|---------------------------------------------------------------------------------------------------------------------------------------------------------------------|-------------------------------------------------------------------------------------------------------------------------------------------------------------------------------------------------------------------|
|                                                                                                                                                                     | Medication 2:<br><hr/> Medication 3:<br><hr/> Medication 4:<br><hr/> Medication 5:<br><hr/>                                                                                                                       |
| 140. Do you have the bottle or package that you could show for medication 1?<br>[Interview to indicate whether bottle or package seen:<br>Seen: Yes _____/No _____] | <input type="checkbox"/> <sub>1</sub> Yes<br><input type="checkbox"/> <sub>2</sub> No                                                                                                                             |
| (a). Was this prescribed by:                                                                                                                                        | <input type="checkbox"/> <sub>1</sub> Doctor<br><input type="checkbox"/> <sub>2</sub> Clinic nurse<br><input type="checkbox"/> <sub>3</sub> None of the above<br><input type="checkbox"/> <sub>4</sub> Don't know |
| (b). Was this over the counter medication                                                                                                                           | <input type="checkbox"/> <sub>1</sub> Yes<br><input type="checkbox"/> <sub>2</sub> No                                                                                                                             |
| (c). No. of days taken                                                                                                                                              | _____ days                                                                                                                                                                                                        |
| (d). Did you take this more than six months before this pregnancy?                                                                                                  | <input type="checkbox"/> <sub>1</sub> Yes<br><input type="checkbox"/> <sub>2</sub> No                                                                                                                             |
| (e). Did you take this during this pregnancy?                                                                                                                       | <input type="checkbox"/> <sub>1</sub> Yes<br><input type="checkbox"/> <sub>2</sub> No                                                                                                                             |
| (f). If yes, in what week of the pregnancy?                                                                                                                         | <input type="checkbox"/> <sub>1</sub> 0-4 weeks<br><input type="checkbox"/> <sub>2</sub> 5-8 weeks<br><input type="checkbox"/> <sub>3</sub> 9-12 weeks<br><input type="checkbox"/> <sub>4</sub> 13+ weeks         |
|                                                                                                                                                                     |                                                                                                                                                                                                                   |
| 141. Do you have the bottle or package that you could show for medication 2?<br>[Interview to indicate whether bottle or package seen:<br>Seen: Yes _____/No _____] | <input type="checkbox"/> <sub>1</sub> Yes<br><input type="checkbox"/> <sub>2</sub> No                                                                                                                             |
| (a). Was this prescribed by:                                                                                                                                        | <input type="checkbox"/> <sub>1</sub> Doctor<br><input type="checkbox"/> <sub>2</sub> Clinic nurse<br><input type="checkbox"/> <sub>3</sub> None of the above<br><input type="checkbox"/> <sub>4</sub> Don't know |
| (b). Was this over the counter medication                                                                                                                           | <input type="checkbox"/> <sub>1</sub> Yes<br><input type="checkbox"/> <sub>2</sub> No                                                                                                                             |
| (c). No. of days taken                                                                                                                                              | _____ days                                                                                                                                                                                                        |
| (d). Did you take this more than six months before this pregnancy?                                                                                                  | <input type="checkbox"/> <sub>1</sub> Yes<br><input type="checkbox"/> <sub>2</sub> No                                                                                                                             |
| (e). Did you take this during this pregnancy?                                                                                                                       | <input type="checkbox"/> <sub>1</sub> Yes<br><input type="checkbox"/> <sub>2</sub> No                                                                                                                             |
| (f). If yes, in what week of the pregnancy?                                                                                                                         | <input type="checkbox"/> <sub>1</sub> 0-4 weeks<br><input type="checkbox"/> <sub>2</sub> 5-8 weeks<br><input type="checkbox"/> <sub>3</sub> 9-12 weeks<br><input type="checkbox"/> <sub>4</sub> 13+ weeks         |
|                                                                                                                                                                     |                                                                                                                                                                                                                   |
| 142. Do you have the bottle or package that you could show for medication 3?<br>[Interview to indicate whether bottle or package seen:<br>Seen: Yes _____/No _____] | <input type="checkbox"/> <sub>1</sub> Yes<br><input type="checkbox"/> <sub>2</sub> No                                                                                                                             |
| (a). Was this prescribed by:                                                                                                                                        | <input type="checkbox"/> <sub>1</sub> Doctor<br><input type="checkbox"/> <sub>2</sub> Clinic nurse<br><input type="checkbox"/> <sub>3</sub> None of the above<br><input type="checkbox"/> <sub>4</sub> Don't know |

|                                                                                                                                                                     |                                                                                                                                                                                                                                                   |
|---------------------------------------------------------------------------------------------------------------------------------------------------------------------|---------------------------------------------------------------------------------------------------------------------------------------------------------------------------------------------------------------------------------------------------|
| (b). Was this over the counter medication                                                                                                                           | <input type="checkbox"/> <sub>1</sub> Yes<br><input type="checkbox"/> <sub>2</sub> No                                                                                                                                                             |
| (c). No. of days taken                                                                                                                                              | _____ days                                                                                                                                                                                                                                        |
| (d). Did you take this more than six months before this pregnancy?                                                                                                  | <input type="checkbox"/> <sub>1</sub> Yes<br><input type="checkbox"/> <sub>2</sub> No                                                                                                                                                             |
| (e). Did you take this during this pregnancy?                                                                                                                       | <input type="checkbox"/> <sub>1</sub> Yes<br><input type="checkbox"/> <sub>2</sub> No                                                                                                                                                             |
| (f). If yes, in what week of the pregnancy?                                                                                                                         | <input type="checkbox"/> <sub>1</sub> 0-4 weeks<br><input type="checkbox"/> <sub>2</sub> 5-8 weeks<br><input type="checkbox"/> <sub>3</sub> 9-12 weeks<br><input type="checkbox"/> <sub>4</sub> 13+ weeks                                         |
|                                                                                                                                                                     |                                                                                                                                                                                                                                                   |
| 143. Do you have the bottle or package that you could show for medication 4?<br>[Interview to indicate whether bottle or package seen:<br>Seen: Yes _____/No _____] | <input type="checkbox"/> <sub>1</sub> Yes<br><input type="checkbox"/> <sub>2</sub> No                                                                                                                                                             |
| (a). Was this prescribed by:                                                                                                                                        | <input type="checkbox"/> <sub>1</sub> Doctor<br><input type="checkbox"/> <sub>2</sub> Clinic nurse<br><input type="checkbox"/> <sub>3</sub> None of the above<br><input type="checkbox"/> <sub>4</sub> Don't know                                 |
| (b). Was this over the counter medication                                                                                                                           | <input type="checkbox"/> <sub>1</sub> Yes<br><input type="checkbox"/> <sub>2</sub> No                                                                                                                                                             |
| (c). No. of days taken                                                                                                                                              | _____ days                                                                                                                                                                                                                                        |
| (d). Did you take this more than six months before this pregnancy?                                                                                                  | <input type="checkbox"/> <sub>1</sub> Yes<br><input type="checkbox"/> <sub>2</sub> No                                                                                                                                                             |
| (e). Did you take this during this pregnancy?                                                                                                                       | <input type="checkbox"/> <sub>1</sub> Yes<br><input type="checkbox"/> <sub>2</sub> No                                                                                                                                                             |
| (f). If yes, in what week of the pregnancy?                                                                                                                         | <input type="checkbox"/> <sub>1</sub> 0-4 weeks<br><input type="checkbox"/> <sub>2</sub> 5-8 weeks<br><input type="checkbox"/> <sub>3</sub> 9-12 weeks<br><input type="checkbox"/> <sub>4</sub> 13+ weeks                                         |
|                                                                                                                                                                     |                                                                                                                                                                                                                                                   |
| 144. Do you have the bottle or package that you could show for medication 5?<br>[Interview to indicate whether bottle or package seen:<br>Seen: Yes _____/No _____] | <input type="checkbox"/> <sub>1</sub> Yes<br><input type="checkbox"/> <sub>2</sub> No                                                                                                                                                             |
| (a). Was this prescribed by:                                                                                                                                        | <input type="checkbox"/> <sub>1</sub> Doctor<br><input type="checkbox"/> <sub>2</sub> Clinic nurse<br><input type="checkbox"/> <sub>3</sub> None of the above<br><input type="checkbox"/> <sub>4</sub> Don't know                                 |
| (b). Was this over the counter medication                                                                                                                           | <input type="checkbox"/> <sub>1</sub> Yes<br><input type="checkbox"/> <sub>2</sub> No                                                                                                                                                             |
| (c). No. of days taken                                                                                                                                              | _____ days                                                                                                                                                                                                                                        |
| (d). Did you take this more than six months before this pregnancy?                                                                                                  | <input type="checkbox"/> <sub>1</sub> Yes<br><input type="checkbox"/> <sub>2</sub> No                                                                                                                                                             |
| (e). Did you take this during this pregnancy?                                                                                                                       | <input type="checkbox"/> <sub>1</sub> Yes<br><input type="checkbox"/> <sub>2</sub> No                                                                                                                                                             |
| (f). If yes, in what week of the pregnancy?                                                                                                                         | <input type="checkbox"/> <sub>1</sub> 0-4 weeks<br><input type="checkbox"/> <sub>2</sub> 5-8 weeks<br><input type="checkbox"/> <sub>3</sub> 9-12 weeks<br><input type="checkbox"/> <sub>4</sub> 13+ weeks                                         |
| <b>I WORK AND LEISURE</b>                                                                                                                                           |                                                                                                                                                                                                                                                   |
| 145. What was your work situation when you became pregnant? ( <i>Fill on one or several boxes for each.</i> )                                                       | <input type="checkbox"/> <sub>1</sub> Student [skip to Q162]<br><input type="checkbox"/> <sub>2</sub> At home [skip to Q162]<br><input type="checkbox"/> <sub>3</sub> Intern/apprentice<br><input type="checkbox"/> <sub>4</sub> Military service |

|                                                                                                                                                                                                                                                                                                                                                                        |                                                                                                                                                                                                                                                                                                                                                                                                                                                                                                                                                                                                                                                                                                                            |
|------------------------------------------------------------------------------------------------------------------------------------------------------------------------------------------------------------------------------------------------------------------------------------------------------------------------------------------------------------------------|----------------------------------------------------------------------------------------------------------------------------------------------------------------------------------------------------------------------------------------------------------------------------------------------------------------------------------------------------------------------------------------------------------------------------------------------------------------------------------------------------------------------------------------------------------------------------------------------------------------------------------------------------------------------------------------------------------------------------|
|                                                                                                                                                                                                                                                                                                                                                                        | <input type="checkbox"/> <sub>5</sub> Unemployed/laid off<br><input type="checkbox"/> <sub>6</sub> Rehabilitation/disabled [skip to Q162]<br><input type="checkbox"/> <sub>7</sub> Employed in public sector<br><input type="checkbox"/> <sub>8</sub> Self-employed<br><input type="checkbox"/> <sub>9</sub> Family member without steady income in family company<br><input type="checkbox"/> <sub>10</sub> manufacturing<br><input type="checkbox"/> <sub>11</sub> chemical<br><input type="checkbox"/> <sub>12</sub> mining<br><input type="checkbox"/> <sub>13</sub> commercial and retail<br><input type="checkbox"/> <sub>14</sub> agricultural and farming<br><input type="checkbox"/> <sub>88</sub> Other<br><hr/> |
| 146. What kind of work do/did you do?                                                                                                                                                                                                                                                                                                                                  | <input type="checkbox"/> <sub>1</sub> general assistant<br><input type="checkbox"/> <sub>2</sub> clerical/administrative<br><input type="checkbox"/> <sub>3</sub> machine operator<br><input type="checkbox"/> <sub>4</sub> farm assistant<br><input type="checkbox"/> <sub>5</sub> supervisor/manager<br><input type="checkbox"/> <sub>6</sub> engineering, designer or planning<br><input type="checkbox"/> <sub>88</sub> other, please specify: _____                                                                                                                                                                                                                                                                   |
| 147. Did you have an extra job (with or without salary) when you became pregnant? ( <i>For example, accountant, hair dresser, singer in a dance band, club leader</i> )                                                                                                                                                                                                | <input type="checkbox"/> <sub>1</sub> Yes<br><input type="checkbox"/> <sub>2</sub> No<br>Describe: _____                                                                                                                                                                                                                                                                                                                                                                                                                                                                                                                                                                                                                   |
| 148. Have you been absent from work more than two weeks during this pregnancy?                                                                                                                                                                                                                                                                                         | <input type="checkbox"/> <sub>1</sub> Yes<br><input type="checkbox"/> <sub>2</sub> No                                                                                                                                                                                                                                                                                                                                                                                                                                                                                                                                                                                                                                      |
| 149. Are you absent from your work at the present time?                                                                                                                                                                                                                                                                                                                | <input type="checkbox"/> <sub>1</sub> Yes<br><input type="checkbox"/> <sub>2</sub> No                                                                                                                                                                                                                                                                                                                                                                                                                                                                                                                                                                                                                                      |
| 150. If yes, what is the reason for your absence? ( <i>Fill in one or several boxes.</i> )                                                                                                                                                                                                                                                                             | <input type="checkbox"/> <sub>1</sub> Medical leave<br><input type="checkbox"/> <sub>2</sub> Leave of absence<br><input type="checkbox"/> <sub>3</sub> Sick child<br><input type="checkbox"/> <sub>88</sub> Other: _____                                                                                                                                                                                                                                                                                                                                                                                                                                                                                                   |
| 151 The usual number of paid working hours a week before you became pregnant and at present.                                                                                                                                                                                                                                                                           | Before the pregnancy hours _____<br>During the pregnancy hours _____                                                                                                                                                                                                                                                                                                                                                                                                                                                                                                                                                                                                                                                       |
| 152. Describe the type of work carried out at your place of work as accurately as possible. ( <i>Write for example, hospital department for children with cancer, body shop at a garage for diesel vehicles, farming with grain and swine, work in the home.</i> )                                                                                                     | _____<br>_____<br>_____<br>_____<br>_____<br>_____<br>_____<br>_____<br>_____                                                                                                                                                                                                                                                                                                                                                                                                                                                                                                                                                                                                                                              |
| Indicate the appropriate answer for each of the following questions concerning your present work situation, using the following score:<br>1 = yes, everyday, more than half of the working day<br>2 = yes, everyday, less than half of the working day<br>3 = yes, periodically, but not daily<br>4 = seldom or never<br>( <i>Fill in only one box in each line.</i> ) |                                                                                                                                                                                                                                                                                                                                                                                                                                                                                                                                                                                                                                                                                                                            |



|                                                                                                                                                                                |                                                                                                                                                                                                                                                                                                                                                                                                                                                                                                                                                                                                                                                                                                                                                                                                                                                                                                                                                                                 |   |   |   |
|--------------------------------------------------------------------------------------------------------------------------------------------------------------------------------|---------------------------------------------------------------------------------------------------------------------------------------------------------------------------------------------------------------------------------------------------------------------------------------------------------------------------------------------------------------------------------------------------------------------------------------------------------------------------------------------------------------------------------------------------------------------------------------------------------------------------------------------------------------------------------------------------------------------------------------------------------------------------------------------------------------------------------------------------------------------------------------------------------------------------------------------------------------------------------|---|---|---|
| If the respondent is not involved in any occupational activity, then <b>skip to Q162</b> . For the purposes of these questions, housework is included as occupational activity |                                                                                                                                                                                                                                                                                                                                                                                                                                                                                                                                                                                                                                                                                                                                                                                                                                                                                                                                                                                 |   |   |   |
| 153. Too much to do, that the work situation is taxing                                                                                                                         | 1                                                                                                                                                                                                                                                                                                                                                                                                                                                                                                                                                                                                                                                                                                                                                                                                                                                                                                                                                                               | 2 | 3 | 4 |
| 154. Bending and turning many times in an hour                                                                                                                                 |                                                                                                                                                                                                                                                                                                                                                                                                                                                                                                                                                                                                                                                                                                                                                                                                                                                                                                                                                                                 |   |   |   |
| 155. Working with hands above shoulder level                                                                                                                                   |                                                                                                                                                                                                                                                                                                                                                                                                                                                                                                                                                                                                                                                                                                                                                                                                                                                                                                                                                                                 |   |   |   |
| 156. Working in a standing or walking position                                                                                                                                 |                                                                                                                                                                                                                                                                                                                                                                                                                                                                                                                                                                                                                                                                                                                                                                                                                                                                                                                                                                                 |   |   |   |
| 157. Can choose to work faster on some days, and slower on some days                                                                                                           |                                                                                                                                                                                                                                                                                                                                                                                                                                                                                                                                                                                                                                                                                                                                                                                                                                                                                                                                                                                 |   |   |   |
| 158. Have a lot of uncomfortable background noise                                                                                                                              |                                                                                                                                                                                                                                                                                                                                                                                                                                                                                                                                                                                                                                                                                                                                                                                                                                                                                                                                                                                 |   |   |   |
| 159. Have a lot of background noise that causes you to raise your voice when talking to others even within a distance of one metre                                             |                                                                                                                                                                                                                                                                                                                                                                                                                                                                                                                                                                                                                                                                                                                                                                                                                                                                                                                                                                                 |   |   |   |
| 160. When are your working hours? ( <i>Fill in one or several boxes.</i> )                                                                                                     | <input type="checkbox"/> <sub>1</sub> Permanent day work<br><input type="checkbox"/> <sub>2</sub> Permanent afternoon or evening work<br><input type="checkbox"/> <sub>3</sub> Permanent night work<br><input type="checkbox"/> <sub>4</sub> Shift work (day and night) or shift rotations<br><input type="checkbox"/> <sub>5</sub> No set times (extra work, extra shifts, temporary employment, etc.)/<br><input type="checkbox"/> <sub>88</sub> Other<br><hr/>                                                                                                                                                                                                                                                                                                                                                                                                                                                                                                               |   |   |   |
| 161. During your pregnancy do you lift anything that weighs more than 10 kg at work? ( <i>10 kilos is the equivalent of a full bucket of water.</i> )                          | <input type="checkbox"/> <sub>1</sub> .Infrequently or never<br><input type="checkbox"/> <sub>2</sub> Yes, less than 20 times a week<br><input type="checkbox"/> <sub>3</sub> Yes, more than 20 times a week<br><input type="checkbox"/> <sub>4</sub> Yes, 10-20 times a day<br><input type="checkbox"/> <sub>5</sub> Yes, more than 20 times a day                                                                                                                                                                                                                                                                                                                                                                                                                                                                                                                                                                                                                             |   |   |   |
| 162. During your pregnancy do you lift anything that weighs more than 10 kg at home? ( <i>10 kilos is the equivalent of a full bucket of water.</i> )                          | <input type="checkbox"/> <sub>1</sub> Infrequently or never<br><input type="checkbox"/> <sub>2</sub> Yes, less than 20 times a week<br><input type="checkbox"/> <sub>3</sub> Yes, more than 20 times a week<br><input type="checkbox"/> <sub>4</sub> Yes, 10-20 times a day<br><input type="checkbox"/> <sub>5</sub> Yes, more than 20 times a day                                                                                                                                                                                                                                                                                                                                                                                                                                                                                                                                                                                                                              |   |   |   |
| 163. What was the baby's father work situation when you became pregnant? ( <i>Fill on one or several boxes for each.</i> )                                                     | <input type="checkbox"/> <sub>1</sub> Student [skip to Q166]<br><input type="checkbox"/> <sub>2</sub> At home [skip to Q166]<br><input type="checkbox"/> <sub>3</sub> Intern/apprentice<br><input type="checkbox"/> <sub>4</sub> Military service<br><input type="checkbox"/> <sub>5</sub> Unemployed/laid off<br><input type="checkbox"/> <sub>6</sub> Rehabilitation/disabled [skip to Q166]<br><input type="checkbox"/> <sub>7</sub> Employed in public sector<br><input type="checkbox"/> <sub>8</sub> Self-employed<br><input type="checkbox"/> <sub>9</sub> Family member without steady income in family company<br><input type="checkbox"/> <sub>10</sub> manufacturing<br><input type="checkbox"/> <sub>11</sub> chemical<br><input type="checkbox"/> <sub>12</sub> mining<br><input type="checkbox"/> <sub>13</sub> commercial and retail<br><input type="checkbox"/> <sub>14</sub> agricultural and farming<br><input type="checkbox"/> <sub>88</sub> Other<br><hr/> |   |   |   |
| 164. Describe the type of work carried out at the baby's father's place of work as accurately as possible. ( <i>Write for example, hospital department for children</i> )      | <hr/> <hr/> <hr/>                                                                                                                                                                                                                                                                                                                                                                                                                                                                                                                                                                                                                                                                                                                                                                                                                                                                                                                                                               |   |   |   |

|                                                                                                                                                                                |                                                                                                                                                                                                                                                                                          |
|--------------------------------------------------------------------------------------------------------------------------------------------------------------------------------|------------------------------------------------------------------------------------------------------------------------------------------------------------------------------------------------------------------------------------------------------------------------------------------|
| <i>with cancer, body shop at a garage for diesel vehicles, farming with grain and swine, work in the home.)</i>                                                                | _____                                                                                                                                                                                                                                                                                    |
| 165. How often do you use a cell phone?                                                                                                                                        | <input type="checkbox"/> <sub>1</sub> Infrequently<br><input type="checkbox"/> <sub>2</sub> Never<br><input type="checkbox"/> <sub>3</sub> A few times a week<br><input type="checkbox"/> <sub>4</sub> Daily<br><input type="checkbox"/> <sub>5</sub> On average more than an hour daily |
| 166. How often do you work with a computer, laser printer or copying machine (at a distance of less than two metres) after you became pregnant?                                | <input type="checkbox"/> <sub>1</sub> Never<br><input type="checkbox"/> <sub>2</sub> A few times a week<br><input type="checkbox"/> <sub>3</sub> Daily<br><input type="checkbox"/> <sub>4</sub> On average more than an hour daily                                                       |
| 167. How often have you worked with x-ray equipment (at a distance of less than two metres) after you became pregnant? ( <i>This does not include treatment as a patient</i> ) | <input type="checkbox"/> <sub>1</sub> Never<br><input type="checkbox"/> <sub>2</sub> A few times a week<br><input type="checkbox"/> <sub>3</sub> Daily<br><input type="checkbox"/> <sub>4</sub> On average more than an hour daily                                                       |
| <b>Have you been in contact with any of the following substances either at work or in your leisure time during the last six months, and if yes, for how many days?</b>         |                                                                                                                                                                                                                                                                                          |
| 168. Lead vapors, lead dust, lead particles or lead alloys                                                                                                                     | <input type="checkbox"/> <sub>1</sub> Yes<br><input type="checkbox"/> <sub>2</sub> No                                                                                                                                                                                                    |
| (a). If yes, for how many days (daily = 180 days)                                                                                                                              | _____ days                                                                                                                                                                                                                                                                               |
| 169. Chrome, arsenic, cadmium or combinations of these                                                                                                                         | <input type="checkbox"/> <sub>1</sub> Yes<br><input type="checkbox"/> <sub>2</sub> No                                                                                                                                                                                                    |
| (a). If yes, for how many days (daily = 180 days)                                                                                                                              | _____ days                                                                                                                                                                                                                                                                               |
| 170. petrol or exhaust vapour (does not apply to filling gasoline in your own car)                                                                                             | <input type="checkbox"/> <sub>1</sub> Yes<br><input type="checkbox"/> <sub>2</sub> No                                                                                                                                                                                                    |
| (a). If yes, for how many days (daily = 180 days)                                                                                                                              | _____ days                                                                                                                                                                                                                                                                               |
| 171. Mercury vapors, mercury or work with amalgam fillings (does not apply to your own dental treatment)                                                                       | <input type="checkbox"/> <sub>1</sub> Yes<br><input type="checkbox"/> <sub>2</sub> No                                                                                                                                                                                                    |
| (a). If yes, for how many days (daily = 180 days)                                                                                                                              | _____ days                                                                                                                                                                                                                                                                               |
| 172. Disinfectants, vermin poisons                                                                                                                                             | <input type="checkbox"/> <sub>1</sub> Yes<br><input type="checkbox"/> <sub>2</sub> No                                                                                                                                                                                                    |
| (a). If yes, for how many days (daily = 180 days)                                                                                                                              | _____ days                                                                                                                                                                                                                                                                               |
| 173. Weed killers, insecticides, fungicides                                                                                                                                    | <input type="checkbox"/> <sub>1</sub> Yes<br><input type="checkbox"/> <sub>2</sub> No                                                                                                                                                                                                    |
| (a). If yes, for how many days (daily = 180 days)                                                                                                                              | _____ days                                                                                                                                                                                                                                                                               |
| 174. Oil-based paint                                                                                                                                                           | <input type="checkbox"/> <sub>1</sub> Yes<br><input type="checkbox"/> <sub>2</sub> No                                                                                                                                                                                                    |
| (a). If yes, for how many days (daily = 180 days)                                                                                                                              | _____ days                                                                                                                                                                                                                                                                               |
| 175. Substances used in welding                                                                                                                                                | <input type="checkbox"/> <sub>1</sub> Yes<br><input type="checkbox"/> <sub>2</sub> No                                                                                                                                                                                                    |
| (a). If yes, for how many days (daily = 180 days)                                                                                                                              | _____ days                                                                                                                                                                                                                                                                               |
| 176. Substances used in soldering                                                                                                                                              | <input type="checkbox"/> <sub>1</sub> Yes<br><input type="checkbox"/> <sub>2</sub> No                                                                                                                                                                                                    |
| (a). If yes, for how many days (daily = 180 days)                                                                                                                              | _____ days                                                                                                                                                                                                                                                                               |
| 177. Formalin/ formaldehyde                                                                                                                                                    | <input type="checkbox"/> <sub>1</sub> Yes<br><input type="checkbox"/> <sub>2</sub> No                                                                                                                                                                                                    |
| (a). If yes, for how many days (daily = 180 days)                                                                                                                              | _____ days                                                                                                                                                                                                                                                                               |
| 178. Photographic chemicals (fixatives or developers)                                                                                                                          | <input type="checkbox"/> <sub>1</sub> Yes<br><input type="checkbox"/> <sub>2</sub> No                                                                                                                                                                                                    |
| (a). If yes, for how many days (daily = 180 days)                                                                                                                              | _____ days                                                                                                                                                                                                                                                                               |
| 179. Motor oil, lubrication oil or other types of oil                                                                                                                          | <input type="checkbox"/> <sub>1</sub> Yes<br><input type="checkbox"/> <sub>2</sub> No                                                                                                                                                                                                    |

|                                                                                                                                                                                                                                             |                                                                                                                                                           |   |   |   |   |
|---------------------------------------------------------------------------------------------------------------------------------------------------------------------------------------------------------------------------------------------|-----------------------------------------------------------------------------------------------------------------------------------------------------------|---|---|---|---|
| (a). If yes, for how many days (daily = 180 days)                                                                                                                                                                                           | _____ days                                                                                                                                                |   |   |   |   |
| 180. Industrial dyes or ink                                                                                                                                                                                                                 | <input type="checkbox"/> <sub>1</sub> Yes<br><input type="checkbox"/> <sub>2</sub> No                                                                     |   |   |   |   |
| (a). If yes, for how many days (daily = 180 days)                                                                                                                                                                                           | _____ days                                                                                                                                                |   |   |   |   |
| 181. Chemotherapeutic substances/chemotherapy treatment (does not apply to your own medical treatment)                                                                                                                                      | <input type="checkbox"/> <sub>1</sub> Yes<br><input type="checkbox"/> <sub>2</sub> No                                                                     |   |   |   |   |
| (a). If yes, for how many days (daily = 180 days)                                                                                                                                                                                           | _____ days                                                                                                                                                |   |   |   |   |
| 182. Laughing gas or other anesthetic gases (does not apply to you own treatment as a patient)                                                                                                                                              | <input type="checkbox"/> <sub>1</sub> Yes<br><input type="checkbox"/> <sub>2</sub> No                                                                     |   |   |   |   |
| (a). If yes, for how many days (daily = 180 days)                                                                                                                                                                                           | _____ days                                                                                                                                                |   |   |   |   |
| 183. Water-based or latex paint                                                                                                                                                                                                             | <input type="checkbox"/> <sub>1</sub> Yes<br><input type="checkbox"/> <sub>2</sub> No                                                                     |   |   |   |   |
| (a). If yes, for how many days (daily = 180 days)                                                                                                                                                                                           | _____ days                                                                                                                                                |   |   |   |   |
| 184. Paint thinner, paint-lacquer-glue remover or other solvents (ex. lynol, turpentine, toluene, carbon tetrachloride)                                                                                                                     | <input type="checkbox"/> <sub>1</sub> Yes<br><input type="checkbox"/> <sub>2</sub> No                                                                     |   |   |   |   |
| (a). If yes, for how many days (daily = 180 days)                                                                                                                                                                                           | _____ days                                                                                                                                                |   |   |   |   |
| 185. Other substances and conditions, describe: _____                                                                                                                                                                                       | <input type="checkbox"/> <sub>1</sub> Yes<br><input type="checkbox"/> <sub>2</sub> No                                                                     |   |   |   |   |
| (a). If yes, for how many days (daily = 180 days)                                                                                                                                                                                           | _____ days                                                                                                                                                |   |   |   |   |
| 186. How often have you been to a night club since you became pregnant?                                                                                                                                                                     | <input type="checkbox"/> <sub>1</sub> 1-2 times a week<br><input type="checkbox"/> <sub>2</sub> Less often<br><input type="checkbox"/> <sub>3</sub> Never |   |   |   |   |
| 187. Are you in contact with animals either at work or in your leisure?                                                                                                                                                                     | <input type="checkbox"/> <sub>1</sub> Yes<br><input type="checkbox"/> <sub>2</sub> No <b>[If no, skip to Q202]</b>                                        |   |   |   |   |
| If yes, what sort of animals?<br>Please indicate how often are you in contact with them on a weekly basis, using the following code:<br>0 = never<br>1 = daily<br>2 = 3-6 times a week<br>3 = 1-2 times a week<br>4 = less than once a week |                                                                                                                                                           |   |   |   |   |
|                                                                                                                                                                                                                                             | 0                                                                                                                                                         | 1 | 2 | 3 | 4 |
| 188. Dog                                                                                                                                                                                                                                    |                                                                                                                                                           |   |   |   |   |
| 189. Cat                                                                                                                                                                                                                                    |                                                                                                                                                           |   |   |   |   |
| 190. Guinea Pig                                                                                                                                                                                                                             |                                                                                                                                                           |   |   |   |   |
| 191. Hamster                                                                                                                                                                                                                                |                                                                                                                                                           |   |   |   |   |
| 192. Rabbit                                                                                                                                                                                                                                 |                                                                                                                                                           |   |   |   |   |
| 193. Bird                                                                                                                                                                                                                                   |                                                                                                                                                           |   |   |   |   |
| 194. Aquarium Fish                                                                                                                                                                                                                          |                                                                                                                                                           |   |   |   |   |
| 195. Cow                                                                                                                                                                                                                                    |                                                                                                                                                           |   |   |   |   |
| 196 Pig                                                                                                                                                                                                                                     |                                                                                                                                                           |   |   |   |   |
| 197 Sheep, goat                                                                                                                                                                                                                             |                                                                                                                                                           |   |   |   |   |
| 199. Horse                                                                                                                                                                                                                                  |                                                                                                                                                           |   |   |   |   |
| 200. Poultry                                                                                                                                                                                                                                |                                                                                                                                                           |   |   |   |   |
| 201. Other: _____                                                                                                                                                                                                                           |                                                                                                                                                           |   |   |   |   |
| <b>J. HABITS</b>                                                                                                                                                                                                                            |                                                                                                                                                           |   |   |   |   |
| 202. Did your mother smoke when she was pregnant with you?                                                                                                                                                                                  | <input type="checkbox"/> <sub>1</sub> Yes<br><input type="checkbox"/> <sub>2</sub> No<br>Don't know                                                       |   |   |   |   |
| 203. Are you exposed to passive smoking at home?                                                                                                                                                                                            | <input type="checkbox"/> <sub>1</sub> Yes                                                                                                                 |   |   |   |   |

|                                                                                                                                                                                                                                                                                                                                              |                                                                                                                                            |   |   |   |
|----------------------------------------------------------------------------------------------------------------------------------------------------------------------------------------------------------------------------------------------------------------------------------------------------------------------------------------------|--------------------------------------------------------------------------------------------------------------------------------------------|---|---|---|
|                                                                                                                                                                                                                                                                                                                                              | <input type="checkbox"/> <sub>2</sub> No                                                                                                   |   |   |   |
| 204. If yes, how many hours a day are you exposed to passive smoking?                                                                                                                                                                                                                                                                        | _____ hours a day                                                                                                                          |   |   |   |
| 2056. Are you exposed to passive smoking at work?                                                                                                                                                                                                                                                                                            | <input type="checkbox"/> <sub>1</sub> Yes<br><input type="checkbox"/> <sub>2</sub> No                                                      |   |   |   |
| 206. If yes, how many hours a day are you exposed to passive smoking?                                                                                                                                                                                                                                                                        | _____ hours a day                                                                                                                          |   |   |   |
| 207. Did the baby's father smoke before you became pregnant?                                                                                                                                                                                                                                                                                 | <input type="checkbox"/> <sub>1</sub> Yes<br><input type="checkbox"/> <sub>2</sub> No                                                      |   |   |   |
| 208. Does he smoke now?                                                                                                                                                                                                                                                                                                                      | <input type="checkbox"/> <sub>1</sub> Yes<br><input type="checkbox"/> <sub>2</sub> No                                                      |   |   |   |
| 209. Have you ever smoked?                                                                                                                                                                                                                                                                                                                   | <input type="checkbox"/> <sub>1</sub> Yes<br><input type="checkbox"/> <sub>2</sub> No (proceed question 104)                               |   |   |   |
| 210. Do you smoke now (after you became pregnant)?                                                                                                                                                                                                                                                                                           | <input type="checkbox"/> <sub>1</sub> No<br><input type="checkbox"/> <sub>2</sub> Sometimes<br><input type="checkbox"/> <sub>3</sub> Daily |   |   |   |
| (a). If yes, how many                                                                                                                                                                                                                                                                                                                        | _____ cigarettes per week<br>_____ cigarettes per day                                                                                      |   |   |   |
| 211. Did you smoke during the last 3 months before you became pregnant this time?                                                                                                                                                                                                                                                            | <input type="checkbox"/> <sub>1</sub> No<br><input type="checkbox"/> <sub>2</sub> Sometimes<br><input type="checkbox"/> <sub>3</sub> Daily |   |   |   |
| (a). If yes, how many                                                                                                                                                                                                                                                                                                                        | _____ cigarettes per week<br>_____ cigarettes per day                                                                                      |   |   |   |
| 212. How old were you when you started to smoke on a daily basis?                                                                                                                                                                                                                                                                            | _____ years                                                                                                                                |   |   |   |
| 213. Have you stopped smoking completely?                                                                                                                                                                                                                                                                                                    | <input type="checkbox"/> <sub>1</sub> Yes<br><input type="checkbox"/> <sub>2</sub> No                                                      |   |   |   |
| 214. If yes, how old were you when you stopped smoking?                                                                                                                                                                                                                                                                                      | _____ years                                                                                                                                |   |   |   |
| 215. If you stopped smoking after you became pregnant, in which week of pregnancy did you stop?                                                                                                                                                                                                                                              | _____ week of pregnancy                                                                                                                    |   |   |   |
| <p>Have you used any of the following substances?<br/>         If yes, please indicate when you used them, using the following code:<br/>         1 = never<br/>         2 = previously<br/>         3 = last month before this pregnancy<br/>         4 = during this pregnancy</p>                                                         |                                                                                                                                            |   |   |   |
| 216. Hash                                                                                                                                                                                                                                                                                                                                    | 1                                                                                                                                          | 2 | 3 | 4 |
| 217. Ecstasy                                                                                                                                                                                                                                                                                                                                 |                                                                                                                                            |   |   |   |
| 218. Heroin                                                                                                                                                                                                                                                                                                                                  |                                                                                                                                            |   |   |   |
| 219. Cocaine                                                                                                                                                                                                                                                                                                                                 |                                                                                                                                            |   |   |   |
| 220. Amphetamine                                                                                                                                                                                                                                                                                                                             |                                                                                                                                            |   |   |   |
| 221. Other:<br>_____                                                                                                                                                                                                                                                                                                                         |                                                                                                                                            |   |   |   |
| 222. Have you ever consumed alcohol?                                                                                                                                                                                                                                                                                                         | <input type="checkbox"/> <sub>1</sub> Yes<br><input type="checkbox"/> <sub>2</sub> No <b>[If no, skip to Q230]</b>                         |   |   |   |
| <p>Alcohol units are used to compare the different types of alcoholic beverages. 1 alcohol unit (= 1.5 cl. pure alcohol) is equivalent to:<br/>         1 bottle/can energy drink or cider<br/>         1 glass (1/3 liter) of beer<br/>         1 wine glass red or white wine<br/>         1 wine glass sherry or other fortified wine</p> |                                                                                                                                            |   |   |   |

|                                                                                                                      |                                                                                                                                                                                                                                                                                                                                                                                                                                                                                |  |
|----------------------------------------------------------------------------------------------------------------------|--------------------------------------------------------------------------------------------------------------------------------------------------------------------------------------------------------------------------------------------------------------------------------------------------------------------------------------------------------------------------------------------------------------------------------------------------------------------------------|--|
| 1 snaps glass spirits or liqueur                                                                                     |                                                                                                                                                                                                                                                                                                                                                                                                                                                                                |  |
| 223. How often did you consume alcohol in the 3 months before you became pregnant?                                   | <input type="checkbox"/> <sub>1</sub> Approximately 6-7 time a week<br><input type="checkbox"/> <sub>2</sub> Approximately 4-5 times a week<br><input type="checkbox"/> <sub>3</sub> approximately 2-3 times a week<br><input type="checkbox"/> <sub>4</sub> approximately once a week<br><input type="checkbox"/> <sub>5</sub> approximately 1-3 times a month<br><input type="checkbox"/> <sub>6</sub> less than once a month<br><input type="checkbox"/> <sub>7</sub> Never |  |
| 224. How often do you consume alcohol during this pregnancy?                                                         | <input type="checkbox"/> <sub>1</sub> Approximately 6-7 time a week<br><input type="checkbox"/> <sub>2</sub> Approximately 4-5 times a week<br><input type="checkbox"/> <sub>3</sub> approximately 2-3 times a week<br><input type="checkbox"/> <sub>4</sub> approximately once a week<br><input type="checkbox"/> <sub>5</sub> approximately 1-3 times a month<br><input type="checkbox"/> <sub>6</sub> less than once a month<br><input type="checkbox"/> <sub>7</sub> Never |  |
| 225. What type of alcohol do you usually drink? ( <i>Fill in one or several boxes.</i> )                             | <input type="checkbox"/> <sub>1</sub> Light beer<br><input type="checkbox"/> <sub>2</sub> Beer<br><input type="checkbox"/> <sub>3</sub> Red wine<br><input type="checkbox"/> <sub>4</sub> White wine<br><input type="checkbox"/> <sub>5</sub> Low alcohol sodas<br><input type="checkbox"/> <sub>6</sub> Fortified wines ( <i>sherry, port wine, Madeira</i> )/ <input type="checkbox"/> <sub>7</sub> Spirits ( <i>vodka, gin, snaps, cognac, whisky, liqueur</i> )            |  |
| 226. Did you drink 5 units or more at least once during the last 3 months before this pregnancy?                     | <input type="checkbox"/> <sub>1</sub> Several times per week<br><input type="checkbox"/> <sub>2</sub> Once a week<br><input type="checkbox"/> <sub>3</sub> 1-3 times a month<br><input type="checkbox"/> <sub>4</sub> Less than once a month<br><input type="checkbox"/> <sub>5</sub> Never                                                                                                                                                                                    |  |
| 227. Did you drink 5 units or more at least once during this pregnancy?                                              | <input type="checkbox"/> <sub>1</sub> Several times per week<br><input type="checkbox"/> <sub>2</sub> Once a week<br><input type="checkbox"/> <sub>3</sub> 1-3 times a month<br><input type="checkbox"/> <sub>4</sub> Less than once a month<br><input type="checkbox"/> <sub>5</sub> Never                                                                                                                                                                                    |  |
| 228. How many units of alcohol did you usually drink when you consume alcohol in the last 3 months before pregnancy? | <input type="checkbox"/> <sub>1</sub> 10 or more<br><input type="checkbox"/> <sub>2</sub> 7-9<br><input type="checkbox"/> <sub>3</sub> 5-6<br><input type="checkbox"/> <sub>4</sub> 3-4<br><input type="checkbox"/> <sub>4</sub> 1-2<br><input type="checkbox"/> <sub>5</sub> Less that 1                                                                                                                                                                                      |  |
| 229. How many units of alcohol do you usually drink when you consume alcohol during this pregnancy?                  | <input type="checkbox"/> <sub>1</sub> 10 or more<br><input type="checkbox"/> <sub>2</sub> 7-9<br><input type="checkbox"/> <sub>3</sub> 5-6<br><input type="checkbox"/> <sub>4</sub> 3-4<br><input type="checkbox"/> <sub>4</sub> 1-2<br><input type="checkbox"/> <sub>5</sub> Less that 1                                                                                                                                                                                      |  |
| <b>K. WEIGHT AND WEIGHT CONTROL</b>                                                                                  |                                                                                                                                                                                                                                                                                                                                                                                                                                                                                |  |
| 230. Do you think you were overweight before this pregnancy?                                                         | <input type="checkbox"/> <sub>1</sub> Yes, a lot<br><input type="checkbox"/> <sub>2</sub> Yes, a little<br><input type="checkbox"/> <sub>3</sub> No                                                                                                                                                                                                                                                                                                                            |  |
| 231. Are you worried about putting on more weight than necessary during this pregnancy?                              | <input type="checkbox"/> <sub>1</sub> Yes, very worried<br><input type="checkbox"/> <sub>2</sub> Somewhat worried<br><input type="checkbox"/> <sub>3</sub> No, not especially worried                                                                                                                                                                                                                                                                                          |  |
| 232. Has anyone said that you were too thin while you felt that you were too fat during the last 2 years?            | <input type="checkbox"/> <sub>1</sub> Yes, often/<br><input type="checkbox"/> <sub>2</sub> Yes, occasionally<br><input type="checkbox"/> <sub>3</sub> No                                                                                                                                                                                                                                                                                                                       |  |

|                                                                                                                                                                                                                                                                                                                                                                                                               |   |   |   |   |   |
|---------------------------------------------------------------------------------------------------------------------------------------------------------------------------------------------------------------------------------------------------------------------------------------------------------------------------------------------------------------------------------------------------------------|---|---|---|---|---|
| <p>Have you ever used any of the following to control your weight in the last 6 months <b>before this pregnancy</b>? If yes, please state how often, using the following codes:<br/> 1 = at least once a week<br/> 2 = seldom<br/> 3 = never</p>                                                                                                                                                              |   |   |   |   |   |
| 233. Vomiting                                                                                                                                                                                                                                                                                                                                                                                                 | 1 | 2 | 3 |   |   |
| 234. Laxatives                                                                                                                                                                                                                                                                                                                                                                                                |   |   |   |   |   |
| 235. Fasting                                                                                                                                                                                                                                                                                                                                                                                                  |   |   |   |   |   |
| 236. Hard physical exercise                                                                                                                                                                                                                                                                                                                                                                                   |   |   |   |   |   |
| <p>Have you ever used any of the following to control your weight <b>during this pregnancy</b>? If yes, please state how often, using the following codes:<br/> 1 = at least once a week<br/> 2 = seldom<br/> 3 = never</p>                                                                                                                                                                                   |   |   |   |   |   |
| 237. Vomiting                                                                                                                                                                                                                                                                                                                                                                                                 | 1 | 2 | 3 |   |   |
| 238. Laxatives                                                                                                                                                                                                                                                                                                                                                                                                |   |   |   |   |   |
| 239. Fasting                                                                                                                                                                                                                                                                                                                                                                                                  |   |   |   |   |   |
| 240. Hard physical exercise                                                                                                                                                                                                                                                                                                                                                                                   |   |   |   |   |   |
| <b>L. PHYSICAL ACTIVITY</b>                                                                                                                                                                                                                                                                                                                                                                                   |   |   |   |   |   |
| <p>How often did you usually exercise in the last 3 months <b>before this pregnancy</b>? For each exercise, please indicate if you do this, and if yes, please indicate how often, using the following code:<br/> 1 = never<br/> 2 = 1-3 times per month<br/> 3 = once a week<br/> 4 = twice a week<br/> 5 = 3 times or more week<br/> <i>(Fill in each line, both before and during this pregnancy.)</i></p> |   |   |   |   |   |
|                                                                                                                                                                                                                                                                                                                                                                                                               | 1 | 2 | 3 | 4 | 5 |
| 241. Walking                                                                                                                                                                                                                                                                                                                                                                                                  |   |   |   |   |   |
| 242. Brisk walking                                                                                                                                                                                                                                                                                                                                                                                            |   |   |   |   |   |
| 243. Running/jogging/cross-country running                                                                                                                                                                                                                                                                                                                                                                    |   |   |   |   |   |
| 244. Bicycling                                                                                                                                                                                                                                                                                                                                                                                                |   |   |   |   |   |
| 245. weight training                                                                                                                                                                                                                                                                                                                                                                                          |   |   |   |   |   |
| 246. Special gymnastics/aerobics for pregnant women                                                                                                                                                                                                                                                                                                                                                           |   |   |   |   |   |
| 247. Aerobics/gymnastics/dance without running and jumping                                                                                                                                                                                                                                                                                                                                                    |   |   |   |   |   |
| 248. Aerobics/gymnastics with running and jumping                                                                                                                                                                                                                                                                                                                                                             |   |   |   |   |   |
| 249. Dancing                                                                                                                                                                                                                                                                                                                                                                                                  |   |   |   |   |   |
| 2450. Team sports                                                                                                                                                                                                                                                                                                                                                                                             |   |   |   |   |   |
| 251. Swimming                                                                                                                                                                                                                                                                                                                                                                                                 |   |   |   |   |   |
| 252. Water aerobics                                                                                                                                                                                                                                                                                                                                                                                           |   |   |   |   |   |
| 253. Riding                                                                                                                                                                                                                                                                                                                                                                                                   |   |   |   |   |   |
| 254. Other                                                                                                                                                                                                                                                                                                                                                                                                    |   |   |   |   |   |
| <p>How often do you usually exercise <b>during this pregnancy</b>?<br/> For each exercise, please indicate if you do this, and if yes, please indicate how often, using the following code:<br/> 1 = never<br/> 2 = 1-3 times per month<br/> 3 = once a week<br/> 4 = twice a week<br/> 5 = 3 times or more week<br/> <i>(Fill in each line, both before and during this pregnancy.)</i></p>                  |   |   |   |   |   |
| 255. Walking                                                                                                                                                                                                                                                                                                                                                                                                  | 1 | 2 | 3 | 4 | 5 |
| 256. Brisk walking                                                                                                                                                                                                                                                                                                                                                                                            |   |   |   |   |   |

|                                                                                                                                                                                                           |                                                                                                                                                                                                                                                                                                                                                   |  |  |  |  |  |
|-----------------------------------------------------------------------------------------------------------------------------------------------------------------------------------------------------------|---------------------------------------------------------------------------------------------------------------------------------------------------------------------------------------------------------------------------------------------------------------------------------------------------------------------------------------------------|--|--|--|--|--|
| 257. Running/jogging/cross-country running                                                                                                                                                                |                                                                                                                                                                                                                                                                                                                                                   |  |  |  |  |  |
| 258. Bicycling                                                                                                                                                                                            |                                                                                                                                                                                                                                                                                                                                                   |  |  |  |  |  |
| 259. weight training                                                                                                                                                                                      |                                                                                                                                                                                                                                                                                                                                                   |  |  |  |  |  |
| 260. Special gymnastics/aerobics for pregnant women                                                                                                                                                       |                                                                                                                                                                                                                                                                                                                                                   |  |  |  |  |  |
| 261. Aerobics/gymnastics/dance without running and jumping                                                                                                                                                |                                                                                                                                                                                                                                                                                                                                                   |  |  |  |  |  |
| 262. Aerobics/gymnastics with running and jumping                                                                                                                                                         |                                                                                                                                                                                                                                                                                                                                                   |  |  |  |  |  |
| 263. Dancing                                                                                                                                                                                              |                                                                                                                                                                                                                                                                                                                                                   |  |  |  |  |  |
| 264. Team sports                                                                                                                                                                                          |                                                                                                                                                                                                                                                                                                                                                   |  |  |  |  |  |
| 265. Swimming                                                                                                                                                                                             |                                                                                                                                                                                                                                                                                                                                                   |  |  |  |  |  |
| 266. Water aerobics                                                                                                                                                                                       |                                                                                                                                                                                                                                                                                                                                                   |  |  |  |  |  |
| 267. Riding                                                                                                                                                                                               |                                                                                                                                                                                                                                                                                                                                                   |  |  |  |  |  |
| 268. Other                                                                                                                                                                                                |                                                                                                                                                                                                                                                                                                                                                   |  |  |  |  |  |
| 269. How often were you so physically active <b>in your leisure time</b> that you get out of breath or sweat in the last 3 months before this pregnancy?                                                  | <input type="checkbox"/> <sub>1</sub> Never<br><input type="checkbox"/> <sub>2</sub> Less than once a week<br><input type="checkbox"/> <sub>3</sub> Once a week<br><input type="checkbox"/> <sub>4</sub> 2 times a week<br><input type="checkbox"/> <sub>5</sub> 3-4 times a week<br><input type="checkbox"/> <sub>6</sub> 5 times a week or more |  |  |  |  |  |
| 270 How often are you currently so physically active <b>in your leisure time</b> that you get out of breath or sweat during this pregnancy?                                                               | <input type="checkbox"/> <sub>1</sub> Never<br><input type="checkbox"/> <sub>2</sub> Less than once a week<br><input type="checkbox"/> <sub>3</sub> Once a week<br><input type="checkbox"/> <sub>4</sub> 2 times a week<br><input type="checkbox"/> <sub>5</sub> 3-4 times a week<br><input type="checkbox"/> <sub>6</sub> 5 times a week or more |  |  |  |  |  |
| 271. How often were you so physically active <b>at work</b> that you get out of breath or sweat in the last 3 months before this pregnancy?                                                               | <input type="checkbox"/> <sub>1</sub> Never<br><input type="checkbox"/> <sub>2</sub> Less than once a week<br><input type="checkbox"/> <sub>3</sub> Once a week<br><input type="checkbox"/> <sub>4</sub> 2 times a week<br><input type="checkbox"/> <sub>5</sub> 3-4 times a week<br><input type="checkbox"/> <sub>6</sub> 5 times a week or more |  |  |  |  |  |
| 272. How often are you currently so physically active <b>at work</b> that you get out of breath or sweat during this pregnancy?                                                                           | <input type="checkbox"/> <sub>1</sub> Never<br><input type="checkbox"/> <sub>2</sub> Less than once a week<br><input type="checkbox"/> <sub>3</sub> Once a week<br><input type="checkbox"/> <sub>4</sub> 2 times a week<br><input type="checkbox"/> <sub>5</sub> 3-4 times a week<br><input type="checkbox"/> <sub>6</sub> 5 times a week or more |  |  |  |  |  |
| <b>We would be grateful if you would write anything else you would like to tell us about this pregnancy or previous births/pregnancies that are not addressed in this questionnaire on the next page.</b> |                                                                                                                                                                                                                                                                                                                                                   |  |  |  |  |  |
| <b>COMMENTS</b>                                                                                                                                                                                           |                                                                                                                                                                                                                                                                                                                                                   |  |  |  |  |  |
| 273. Are your contact numbers the same?                                                                                                                                                                   | <input type="checkbox"/> <sub>1</sub> Yes <b>[if yes, skip to Q274]</b><br><input type="checkbox"/> <sub>2</sub> No                                                                                                                                                                                                                               |  |  |  |  |  |
| 274. If NO, what is your new contact number/s?                                                                                                                                                            | Home: _____<br>Cell: _____<br>Other: _____                                                                                                                                                                                                                                                                                                        |  |  |  |  |  |
| 275. Are you living at the same address?                                                                                                                                                                  | <input type="checkbox"/> <sub>1</sub> Yes <b>[if yes, skip to Q283]</b><br><input type="checkbox"/> <sub>2</sub> No<br><input type="checkbox"/> <sub>99</sub> Refused to answer <b>[skip to Q283]</b>                                                                                                                                             |  |  |  |  |  |
| 276. If No, What is your new address?                                                                                                                                                                     |                                                                                                                                                                                                                                                                                                                                                   |  |  |  |  |  |

|                                                                                                                                          |                                                                                                                                                                                                                                                                                                                                                                          |  |
|------------------------------------------------------------------------------------------------------------------------------------------|--------------------------------------------------------------------------------------------------------------------------------------------------------------------------------------------------------------------------------------------------------------------------------------------------------------------------------------------------------------------------|--|
|                                                                                                                                          | House No.<br>_____<br>Road/Street<br>_____<br>City<br>_____<br>Postal Code<br>_____                                                                                                                                                                                                                                                                                      |  |
| 277. When did you move to your new address?                                                                                              | _____ month _____ year                                                                                                                                                                                                                                                                                                                                                   |  |
|                                                                                                                                          |                                                                                                                                                                                                                                                                                                                                                                          |  |
| 278. What type of new house do you currently live in?                                                                                    | <input type="checkbox"/> <sub>1</sub> Detached house, Semidetached<br><input type="checkbox"/> <sub>2</sub> Farm<br><input type="checkbox"/> <sub>3</sub> Flat, Terraced flat, Apartment building<br><input type="checkbox"/> <sub>4</sub> Refused to answer<br><input type="checkbox"/> <sub>88</sub> Other _____                                                       |  |
| 279. Has there been water damage, visible signs of fungus/mildew or a smell of mildew in your new home ? (Fill in one or several boxes.) | <input type="checkbox"/> <sub>1</sub> No<br><input type="checkbox"/> <sub>2</sub> Yes, water damage<br><input type="checkbox"/> <sub>3</sub> Yes, signs of fungus and mould<br><input type="checkbox"/> <sub>4</sub> Yes, a smell of mildew<br><input type="checkbox"/> <sub>99</sub> don't know                                                                         |  |
| 280. Is your new home drinking water from the tap or from a river or dam?                                                                | <input type="checkbox"/> <sub>1</sub> tap<br><input type="checkbox"/> <sub>2</sub> river or dam<br><input type="checkbox"/> <sub>3</sub> well<br><input type="checkbox"/> <sub>88</sub> other, please specify: _____                                                                                                                                                     |  |
| 281. Have you used a room heater in one or more rooms in this house?                                                                     | <input type="checkbox"/> <sub>1</sub> Yes<br><input type="checkbox"/> <sub>2</sub> No [if No, skip to Q281]<br><input type="checkbox"/> <sub>99</sub> don't know (skip to Q281)                                                                                                                                                                                          |  |
| (a). Was this heater fueled by                                                                                                           | <input type="checkbox"/> <sub>1</sub> paraffin<br><input type="checkbox"/> <sub>2</sub> gas<br><input type="checkbox"/> <sub>3</sub> electricity<br><input type="checkbox"/> <sub>4</sub> wood<br><input type="checkbox"/> <sub>5</sub> coal<br><input type="checkbox"/> <sub>88</sub> other, please specify: _____<br><input type="checkbox"/> <sub>99</sub> don't know |  |
| 282. Is a stove or oven used for cooking in this house?                                                                                  | <input type="checkbox"/> <sub>1</sub> Yes<br><input type="checkbox"/> <sub>2</sub> No [if No, skip to Q282]<br><input type="checkbox"/> <sub>99</sub> Don't know [skip to Q282]                                                                                                                                                                                          |  |
| (a). What is the primary source of heat for this stove or oven?                                                                          | <input type="checkbox"/> <sub>1</sub> paraffin<br><input type="checkbox"/> <sub>2</sub> gas<br><input type="checkbox"/> <sub>3</sub> electricity<br><input type="checkbox"/> <sub>4</sub> wood<br><input type="checkbox"/> <sub>5</sub> coal<br><input type="checkbox"/> <sub>88</sub> other, please specify: _____<br><input type="checkbox"/> <sub>99</sub> don't know |  |
| 283. Have you been scanned by ultrasound during the pregnancy?                                                                           | <input type="checkbox"/> <sub>1</sub> Yes<br><input type="checkbox"/> <sub>2</sub> No [if No, skip to Q286]<br><input type="checkbox"/> <sub>99</sub> Don't know [skip to Q286]                                                                                                                                                                                          |  |
| 284. If Yes, At what week of pregnancy were you scanned?                                                                                 | _____ weeks                                                                                                                                                                                                                                                                                                                                                              |  |
| 285. Did the ultrasound show normal conditions?                                                                                          | <input type="checkbox"/> <sub>1</sub> Yes [if yes, skip to Q286]<br><input type="checkbox"/> <sub>2</sub> No<br><input type="checkbox"/> <sub>99</sub> Don't know [skip to Q286]                                                                                                                                                                                         |  |
| 286. If No, please explain                                                                                                               |                                                                                                                                                                                                                                                                                                                                                                          |  |



|                                                                               |                                                                                                                                                                                               |  |
|-------------------------------------------------------------------------------|-----------------------------------------------------------------------------------------------------------------------------------------------------------------------------------------------|--|
| 287. Have you had bleedings from the vagina at anytime during this pregnancy? | <input type="checkbox"/> <sub>1</sub> Yes<br><input type="checkbox"/> <sub>2</sub> No <b>[If No, skip to Q288]</b><br><input type="checkbox"/> <sub>99</sub> Don't know <b>[skip to Q288]</b> |  |
| 288. What is the reason for your bleeding?                                    | Explain:                                                                                                                                                                                      |  |
| 289. Did you have any contractions?                                           | <input type="checkbox"/> <sub>1</sub> Yes<br><input type="checkbox"/> <sub>2</sub> No<br><input type="checkbox"/> <sub>99</sub> Don't know                                                    |  |

**Thank you!**
